# Supplementary material
Source: HighWire-hosted journal article supplement (http://www.jneurosci.org/highwire/filestream/599028/field_highwire_adjunct_files/0/330_Cahoy_S_Table_S3a_MAS5_Data_Table_2007-09-11.xls)
Supplement: 330_Cahoy_S_Table_S3a_MAS5_Data_Table_2007-09-11.xls [file 330_Cahoy_S_Table_S3a_MAS5_Data_Table_2007-09-11.xls]

## Sheet: 2007-06-06 Master Data Table
Supplemental Table S3a: 3'-Array MAS 5.0 master data table of 20,932 probe sets with significant expression in the CNS.
Probe Set ID	Cultured Astroglia	Astrocytes P1	Astrocytes P7-P8	Astrocytes P17	Astrocytes Gray P17	Neurons P7n	Neurons P7	Neurons P16n	Neurons P16	OPCs	Oligos	Myelin Oligos	Forebrain P17		Gene Symbol	Gene Title	Cultured Astrocytes	Astrocytes P1	Astrocytes P7	Astrocytes P17	Astrocytes Cortical P17	Neurons P7n	Neurons P16n	Neurons P7	Neurons P16	OPCs	Oligos	Myelin Oligos	Forebrain P17
1443306_at	64	269	260	379	494	269	183	73	90	284	51	34	94		0 day neonate cerebellum cDNA, RIKEN full-length enriched library, clone:C230004E12 product:hypothetical protein, full insert sequence	0 day neonate cerebellum cDNA, RIKEN full-length enriched library, clone:C230004E12 product:hypothetical protein, full insert sequence	A	P	P	P	P	P	A	P	A	P	A	A	A
1445202_at	14	91	83	40	31	2138	2559	1798	1536	135	18	10	3354		0 day neonate cerebellum cDNA, RIKEN full-length enriched library, clone:C230022P04 product:unclassifiable, full insert sequence	0 day neonate cerebellum cDNA, RIKEN full-length enriched library, clone:C230022P04 product:unclassifiable, full insert sequence	A	A	A	A	A	P	P	P	P	A	A	A	P
1442188_at	91	200	161	152	127	10	29	10	44	339	183	29	8		0 day neonate cerebellum cDNA, RIKEN full-length enriched library, clone:C230031C13 product:unclassifiable, full insert sequence	0 day neonate cerebellum cDNA, RIKEN full-length enriched library, clone:C230031C13 product:unclassifiable, full insert sequence	A	P	P	P	A	A	A	A	A	P	A	A	A
1440487_at	10	330	480	363	867	688	1014	862	504	1180	363	189	727		0 day neonate cerebellum cDNA, RIKEN full-length enriched library, clone:C230056E17 product:unclassifiable, full insert sequence	0 day neonate cerebellum cDNA, RIKEN full-length enriched library, clone:C230056E17 product:unclassifiable, full insert sequence	A	P	P	P	P	P	P	P	P	P	P	P	P
1415973_at	4186	22587	15831	4264	1595	8862	7764	5388	4604	14853	20622	13905	6303		0 day neonate cerebellum cDNA, RIKEN full-length enriched library, clone:C230070N19 product:myristoylated alanine rich protein kinase C substrate, full insert sequence	0 day neonate cerebellum cDNA, RIKEN full-length enriched library, clone:C230070N19 product:myristoylated alanine rich protein kinase C substrate, full insert sequence	P	P	P	P	P	P	P	P	P	P	P	P	P
1456700_x_at	8399	31914	22338	8336	3337	15995	12357	8050	6605	14923	20655	14003	11225		0 day neonate cerebellum cDNA, RIKEN full-length enriched library, clone:C230070N19 product:myristoylated alanine rich protein kinase C substrate, full insert sequence	0 day neonate cerebellum cDNA, RIKEN full-length enriched library, clone:C230070N19 product:myristoylated alanine rich protein kinase C substrate, full insert sequence	P	P	P	P	P	P	P	P	P	P	P	P	P
1441983_at	4	777	350	24	38	745	657	1093	887	220	56	13	1530		0 day neonate cerebellum cDNA, RIKEN full-length enriched library, clone:C230096I08 product:hypothetical protein, full insert sequence	0 day neonate cerebellum cDNA, RIKEN full-length enriched library, clone:C230096I08 product:hypothetical protein, full insert sequence	A	P	P	A	A	P	P	P	P	P	A	A	P
1442823_at	82	176	125	35	9	775	798	863	479	250	102	40	1086		0 day neonate eyeball cDNA, RIKEN full-length enriched library, clone:E130001F20 product:hypothetical protein, full insert sequence	0 day neonate eyeball cDNA, RIKEN full-length enriched library, clone:E130001F20 product:hypothetical protein, full insert sequence	A	P	P	A	A	P	P	P	P	P	A	A	P
1439906_at	230	2137	836	620	975	1881	1046	4058	2059	2256	672	580	2555		0 day neonate eyeball cDNA, RIKEN full-length enriched library, clone:E130004J04 product:unclassifiable, full insert sequence	0 day neonate eyeball cDNA, RIKEN full-length enriched library, clone:E130004J04 product:unclassifiable, full insert sequence	P	P	P	P	P	P	P	P	P	P	P	P	P
1455406_at	502	719	770	616	697	2250	1110	1019	897	1679	1493	269	875		0 day neonate head cDNA, RIKEN full-length enriched library, clone:4833431M13 product:unclassifiable, full insert sequence	0 day neonate head cDNA, RIKEN full-length enriched library, clone:4833431M13 product:unclassifiable, full insert sequence	P	P	P	P	P	P	P	P	P	P	P	P	P
1457384_at	121	179	119	138	220	178	129	160	109	245	211	173	132		0 day neonate head cDNA, RIKEN full-length enriched library, clone:4833438M18 product:unclassifiable, full insert sequence	0 day neonate head cDNA, RIKEN full-length enriched library, clone:4833438M18 product:unclassifiable, full insert sequence	P	P	P	P	P	P	P	P	P	P	P	P	P
1455468_at	1009	2345	3043	4166	6329	892	526	711	557	1317	582	182	1020		0 day neonate kidney cDNA, RIKEN full-length enriched library, clone:D630029P09 product:unclassifiable, full insert sequence	0 day neonate kidney cDNA, RIKEN full-length enriched library, clone:D630029P09 product:unclassifiable, full insert sequence	P	P	P	P	P	P	P	P	P	P	P	P	P
1457257_x_at	2427	2028	1477	5519	4283	82	71	38	54	1687	698	400	213		0 day neonate lung cDNA, RIKEN full-length enriched library, clone:E030046E07 product:unclassifiable, full insert sequence	0 day neonate lung cDNA, RIKEN full-length enriched library, clone:E030046E07 product:unclassifiable, full insert sequence	P	P	P	P	P	P	P	P	A	P	P	P	P
1442691_at	41	127	130	123	176	94	37	20	65	49	128	218	61		0 day neonate lung cDNA, RIKEN full-length enriched library, clone:E030049N05 product:unclassifiable, full insert sequence	0 day neonate lung cDNA, RIKEN full-length enriched library, clone:E030049N05 product:unclassifiable, full insert sequence	A	P	P	P	P	P	A	A	P	A	P	P	P
1437375_at	416	1644	1483	1521	1581	1451	1106	883	505	528	407	365	1402		0 day neonate thymus cDNA, RIKEN full-length enriched library, clone:A430010E21 product:unclassifiable, full insert sequence	0 day neonate thymus cDNA, RIKEN full-length enriched library, clone:A430010E21 product:unclassifiable, full insert sequence	P	P	P	P	P	P	P	P	P	P	P	P	P
1416628_at	2360	2520	3590	3310	3053	2248	3216	2625	2196	4815	5628	5018	2631		0610006I08Rik	RIKEN cDNA 0610006I08 gene	P	P	P	P	P	P	P	P	P	P	P	P	P
1428380_at	3811	3003	5312	4061	3977	1131	2907	2595	2595	4284	4334	4976	2157		0610007C21Rik	RIKEN cDNA 0610007C21 gene	P	P	P	P	P	P	P	P	P	P	P	P	P
1428544_at	1264	394	676	605	489	320	524	535	686	372	766	1095	289		0610007L01Rik	RIKEN cDNA 0610007L01 gene	P	P	P	P	P	P	P	P	P	P	P	P	P
1433900_at	1515	1012	1398	1270	1166	2178	1211	1453	1474	1491	1585	1011	1187		0610007L01Rik	RIKEN cDNA 0610007L01 gene	P	P	P	P	P	P	P	P	P	P	P	P	P
1429027_at	597	291	265	331	211	94	129	203	265	339	145	148	108		0610007N19Rik	RIKEN cDNA 0610007N19 gene	P	P	P	P	A	A	A	A	A	A	A	A	A
1419351_a_at	1628	741	1023	1136	1319	1012	842	916	821	1038	849	670	1190		0610007P06Rik	RIKEN cDNA 0610007P06 gene	P	P	P	P	P	P	P	P	P	P	P	P	P
1419352_at	2439	680	1574	1385	1642	1337	1432	1144	1336	1474	1301	1220	1727		0610007P06Rik	RIKEN cDNA 0610007P06 gene	P	P	P	P	P	P	P	P	P	P	P	P	P
1454161_s_at	906	981	2405	1549	1289	779	1030	1242	852	2012	2538	3234	820		0610007P14Rik	RIKEN cDNA 0610007P14 gene	P	P	P	P	P	P	P	P	P	P	P	P	P
1431132_x_at	372	462	390	215	283	377	595	627	317	326	270	314	557		0610007P22Rik	RIKEN cDNA 0610007P22 gene	P	A	P	P	A	P	P	P	P	P	P	P	P
1437969_s_at	632	419	770	612	510	491	769	530	554	689	603	753	501		0610007P22Rik	RIKEN cDNA 0610007P22 gene	P	P	P	P	P	P	P	P	P	P	P	P	P
1452800_a_at	2798	1396	1979	2767	3300	2582	2784	3330	2786	1478	1149	886	3382		0610008C08Rik /// LOC621156 /// LOC631337	RIKEN cDNA 0610008C08 gene /// hypothetical LOC621156 /// hypothetical protein LOC631337	P	P	P	P	P	P	P	P	P	P	P	P	P
1418083_at	3174	1529	1702	2536	2792	1270	1370	1843	1679	2054	2563	3111	2202		0610009B22Rik	RIKEN cDNA 0610009B22 gene	P	P	P	P	P	P	P	P	P	P	P	P	P
1417054_a_at	3785	4482	4147	4028	3351	2047	2897	2907	1980	3534	5073	3482	3415		0610009D07Rik	RIKEN cDNA 0610009D07 gene	P	P	P	P	P	P	P	P	P	P	P	P	P
1417055_at	1733	1709	2021	1661	2085	502	1416	1045	931	1750	2033	1393	1080		0610009D07Rik	RIKEN cDNA 0610009D07 gene	P	P	P	P	P	P	P	P	P	P	P	P	P
1436681_x_at	895	1267	1047	758	977	584	727	996	674	848	1116	909	942		0610009D07Rik	RIKEN cDNA 0610009D07 gene	P	P	P	P	P	P	P	P	P	P	P	P	P
1452756_at	910	1357	3483	2632	2420	644	603	765	763	700	358	353	409		0610009J22Rik	RIKEN cDNA 0610009J22 gene	P	P	P	P	P	P	P	P	P	P	P	P	P
1434118_at	216	138	188	250	213	208	168	214	184	196	112	181	126		0610009K11Rik	RIKEN cDNA 0610009K11 gene	P	A	P	P	P	P	A	P	P	P	P	A	A
1451401_a_at	752	424	594	817	798	619	599	1005	1040	472	440	532	867		0610009K11Rik	RIKEN cDNA 0610009K11 gene	P	P	P	P	P	P	P	P	P	P	P	P	P
1453141_at	335	328	327	385	250	144	204	244	157	448	354	227	147		0610009L18Rik	RIKEN cDNA 0610009L18 gene	P	P	P	P	P	P	P	P	P	P	P	P	P
1416358_at	426	250	344	213	238	320	598	429	390	291	211	154	187		0610009O03Rik	RIKEN cDNA 0610009O03 gene	P	P	P	P	A	P	P	P	P	P	P	P	P
1452685_at	201	263	399	355	248	113	219	242	213	319	257	262	146		0610009O20Rik	RIKEN cDNA 0610009O20 gene	P	A	P	P	A	A	P	P	P	P	P	P	A
1450098_at	123	144	166	184	223	52	87	88	83	76	78	63	72		0610010D20Rik	RIKEN cDNA 0610010D20 gene	P	P	P	P	P	P	P	P	A	A	P	A	A
1427138_at	229	241	520	467	387	185	272	208	160	536	226	76	200		0610010D24Rik	RIKEN cDNA 0610010D24 gene	P	P	P	P	P	P	P	P	P	P	P	P	P
1433936_at	423	429	795	557	656	301	542	572	512	929	1050	931	385		0610010E21Rik	RIKEN cDNA 0610010E21 gene	P	P	P	P	P	P	P	P	P	P	P	P	P
1428652_at	716	812	629	379	764	5283	3543	2939	2062	1061	1848	2212	3058		0610010F05Rik	RIKEN cDNA 0610010F05 gene	P	P	P	P	P	P	P	P	P	P	P	P	P
1456660_a_at	88	100	126	93	110	273	231	177	168	124	141	243	122		0610010F05Rik	RIKEN cDNA 0610010F05 gene	P	P	P	P	P	P	P	P	P	P	P	P	P
1433463_at	4897	4108	3200	5824	4589	4851	4684	2689	3261	4723	6017	6800	2954		0610010K06Rik	RIKEN cDNA 0610010K06 gene	P	P	P	P	P	P	P	P	P	P	P	P	P
1428679_s_at	294	391	579	312	263	325	729	483	516	494	329	234	273		0610010K14Rik	RIKEN cDNA 0610010K14 gene	P	P	P	P	P	P	P	P	P	P	P	P	P
1429252_at	315	340	553	399	397	270	463	333	343	524	308	230	202		0610010K14Rik	RIKEN cDNA 0610010K14 gene	P	P	P	P	P	P	P	P	P	P	P	P	P
1427878_at	3784	1374	1205	3013	3101	1281	1626	2274	1831	785	958	2408	1743		0610010O12Rik	RIKEN cDNA 0610010O12 gene	P	P	P	P	P	P	P	P	P	P	P	P	P
1431126_a_at	980	900	861	893	960	470	519	935	491	871	534	522	574		0610011F06Rik	RIKEN cDNA 0610011F06 gene	P	P	P	P	P	P	P	P	P	P	P	P	P
1434771_at	726	430	515	581	576	552	524	921	581	933	502	370	639		0610011F06Rik	RIKEN cDNA 0610011F06 gene	P	P	P	P	P	P	P	P	P	P	P	P	P
1423909_at	5557	1380	2286	3426	3376	30	109	222	263	3343	1315	163	547		0610011I04Rik	RIKEN cDNA 0610011I04 gene	P	P	P	P	P	A	A	A	A	P	P	A	P
1425603_at	2590	606	404	712	992	48	82	205	146	602	202	58	111		0610011I04Rik	RIKEN cDNA 0610011I04 gene	P	P	P	P	P	P	P	P	P	P	P	A	P
1441811_x_at	4203	915	1333	2279	2475	7	111	257	242	2459	1078	104	401		0610011I04Rik	RIKEN cDNA 0610011I04 gene	P	P	P	P	P	A	P	A	A	P	P	A	P
1426017_a_at	897	388	800	730	624	661	917	1171	883	819	855	724	579		0610011L14Rik	RIKEN cDNA 0610011L14 gene	P	P	P	P	P	P	P	P	P	P	P	P	P
1437835_a_at	478	293	405	462	253	378	449	361	397	394	455	411	300		0610011L14Rik	RIKEN cDNA 0610011L14 gene	P	P	P	P	P	P	P	P	P	P	P	P	P
1437836_x_at	191	120	137	161	182	95	136	226	305	202	205	234	138		0610011L14Rik	RIKEN cDNA 0610011L14 gene	P	P	A	P	P	A	A	P	A	A	P	P	P
1436133_at	169	303	219	239	282	207	203	225	194	228	177	58	261		0610011N22Rik	RIKEN cDNA 0610011N22 gene	P	P	P	P	P	P	P	P	P	P	P	A	P
1449096_at	905	456	485	913	948	407	381	698	569	586	439	722	1123		0610011N22Rik	RIKEN cDNA 0610011N22 gene	P	P	P	P	P	P	A	P	P	P	P	P	P
1455248_at	674	776	768	620	667	394	467	548	452	721	356	314	708		0610011N22Rik	RIKEN cDNA 0610011N22 gene	P	P	P	P	P	P	P	P	P	P	P	P	P
1417710_at	8603	9217	9784	6481	5576	4722	5306	4643	3677	8092	6502	3824	3798		0610012D09Rik	RIKEN cDNA 0610012D09 gene	P	P	P	P	P	P	P	P	P	P	P	P	P
1438171_x_at	4200	9911	5957	3440	3864	4231	3213	4649	2296	3310	3338	2088	3722		0610012D09Rik	RIKEN cDNA 0610012D09 gene	P	P	P	P	P	P	P	P	P	P	P	P	P
1428972_at	409	368	382	201	278	306	502	690	403	187	203	288	398		0610012D17Rik	RIKEN cDNA 0610012D17 gene	P	P	P	P	P	P	P	P	P	P	P	P	P
1428973_s_at	459	272	292	268	287	205	432	431	324	177	174	281	354		0610012D17Rik	RIKEN cDNA 0610012D17 gene	P	P	P	P	P	P	P	P	P	P	P	P	P
1417002_at	1506	1270	1755	1939	1793	1022	2673	2412	2033	2036	2485	2540	1996		0610012G03Rik	RIKEN cDNA 0610012G03 gene	P	P	P	P	P	P	P	P	P	P	P	P	P
1417003_at	73	70	30	45	148	362	203	391	209	168	195	212	174		0610012G03Rik /// LOC638521	RIKEN cDNA 0610012G03 gene /// hypothetical protein LOC638521	A	A	A	A	A	P	P	P	P	P	P	P	P
1448540_a_at	790	982	1134	987	846	761	1417	1441	1025	838	1202	1261	1439		0610012G03Rik /// LOC638521	RIKEN cDNA 0610012G03 gene /// hypothetical protein LOC638521	P	P	P	P	P	P	P	P	P	P	P	P	P
1428078_at	889	749	1039	893	1519	227	143	207	287	612	303	153	415		0610013E23Rik	RIKEN cDNA 0610013E23 gene	P	P	P	P	P	P	P	P	P	P	P	P	P
1420339_at	349	272	258	243	325	483	277	172	242	313	277	173	374		0610016J10Rik	RIKEN cDNA 0610016J10 gene	P	P	P	P	P	P	P	P	P	P	P	P	P
1449821_a_at	2283	1215	1775	1103	1343	1354	1219	753	837	1435	1224	1618	650		0610016J10Rik /// LOC619602	RIKEN cDNA 0610016J10 gene /// hypothetical LOC619602	P	P	P	P	P	P	P	P	P	P	P	P	P
1430417_s_at	393	436	439	468	521	1397	1212	750	946	806	714	887	638		0610025P10Rik	RIKEN cDNA 0610025P10 gene	P	P	P	P	P	P	P	P	P	P	P	P	P
1435538_at	373	835	510	779	714	971	501	316	398	1225	835	946	536		0610030E20Rik	RIKEN cDNA 0610030E20 gene	P	P	P	P	A	P	A	P	P	P	P	P	P
1453243_at	88	216	111	157	155	106	61	18	96	256	221	279	168		0610030E20Rik	RIKEN cDNA 0610030E20 gene	A	A	A	A	A	A	A	A	A	A	A	P	A
1416830_at	2690	1154	2752	2717	2184	390	872	1064	1791	1595	1178	2156	760		0610031J06Rik	RIKEN cDNA 0610031J06 gene	P	P	P	P	P	P	P	P	P	P	P	P	P
1451321_a_at	1481	397	440	601	422	1408	1192	1232	981	676	205	38	809		0610033I05Rik	RIKEN cDNA 0610033I05 gene	P	P	P	P	P	P	P	P	P	P	P	A	P
1426467_s_at	688	687	1654	827	884	442	729	568	671	868	748	602	361		0610037L13Rik	RIKEN cDNA 0610037L13 gene	P	P	P	P	P	P	P	P	P	P	P	P	P
1426468_at	868	1109	1356	970	1020	523	639	512	595	1441	745	673	504		0610037L13Rik	RIKEN cDNA 0610037L13 gene	P	P	P	P	P	P	P	P	P	P	P	P	P
1429879_at	126	443	229	244	363	520	199	425	276	352	246	399	245		0610037L13Rik	RIKEN cDNA 0610037L13 gene	A	P	P	P	P	P	P	P	P	P	P	P	P
1456370_s_at	91	211	211	282	279	325	161	238	247	356	261	537	143		0610037L13Rik	RIKEN cDNA 0610037L13 gene	A	A	P	P	A	P	P	P	P	P	P	P	A
1451187_at	3868	3055	2056	2503	2508	2828	2281	2871	1854	3396	3527	3078	1904		0610037P05Rik	RIKEN cDNA 0610037P05 gene	P	P	P	P	P	P	P	P	P	P	P	P	P
1425299_s_at	3222	3131	3431	2545	1748	1118	3011	2261	2724	3669	3262	2978	2116		0610038D11Rik /// LOC623390 /// LOC627985 /// LOC631562 /// LOC665860	RIKEN cDNA 0610038D11 gene /// similar to UPF0315 protein /// similar to UPF0315 protein /// similar to UPF0315 protein /// similar to UPF0315 protein	P	P	P	P	P	P	P	P	P	P	P	P	P
1428880_at	1620	340	703	1175	1453	537	699	1128	941	542	657	841	1420		0610038F07Rik	RIKEN cDNA 0610038F07 gene	P	P	P	P	P	P	P	P	P	P	P	P	P
1452941_at	479	319	484	615	795	354	344	322	413	420	440	467	529		0610038F07Rik	RIKEN cDNA 0610038F07 gene	P	P	P	P	P	P	P	P	P	P	P	P	P
1428797_at	718	479	567	366	530	789	913	568	477	663	440	306	281		0610039J04Rik	RIKEN cDNA 0610039J04 gene	P	P	P	P	P	P	P	P	P	P	P	P	P
1428798_s_at	442	249	412	276	339	569	678	359	292	625	358	163	203		0610039J04Rik	RIKEN cDNA 0610039J04 gene	P	P	P	P	P	P	P	P	P	P	P	P	P
1456161_at	149	157	163	203	201	47	111	156	91	177	250	308	129		0610040B10Rik	RIKEN cDNA 0610040B10 gene	P	P	P	P	P	P	P	P	P	P	P	P	P
1423133_at	1635	898	1673	1664	1521	689	1184	1105	1036	1786	2056	2617	1089		0610040D20Rik	RIKEN cDNA 0610040D20 gene	P	P	P	P	P	P	P	P	P	P	P	P	P
1424404_at	52	514	951	823	1019	8	29	7	39	1783	468	306	156		0610040J01Rik	RIKEN cDNA 0610040J01 gene	A	P	P	P	P	A	A	A	A	P	P	P	P
1423208_at	747	1031	882	722	719	1343	836	997	708	1076	1421	984	1286		0610041E09Rik	RIKEN cDNA 0610041E09 gene	P	P	P	P	P	P	P	P	P	P	P	P	P
1423209_at	97	264	130	121	103	182	127	173	149	265	331	176	179		0610041E09Rik	RIKEN cDNA 0610041E09 gene	A	P	A	P	A	P	P	P	A	P	P	P	P
1425780_a_at	3947	2553	2236	1719	1936	1636	1497	1531	1847	3323	4685	3457	2193		0610041E09Rik	RIKEN cDNA 0610041E09 gene	P	P	P	P	P	P	P	P	P	P	P	P	P
1450904_at	3619	3680	2344	2536	2897	2938	2430	2217	2031	4308	5776	3375	3326		0610041E09Rik	RIKEN cDNA 0610041E09 gene	P	P	P	P	P	P	P	P	P	P	P	P	P
1424505_at	196	321	436	709	1045	239	331	352	332	360	380	622	340		0610042C05Rik	RIKEN cDNA 0610042C05 gene	A	A	P	P	P	A	A	P	P	P	P	P	A
1429613_at	109	43	97	92	153	63	119	165	152	122	351	236	237		0710001B24Rik	RIKEN cDNA 0710001B24 gene	A	A	A	A	A	A	P	A	A	A	P	P	A
1436060_at	188	419	280	208	282	488	558	518	414	854	368	305	401		0710005M24Rik	RIKEN cDNA 0710005M24 gene	P	P	P	P	P	P	P	P	P	P	P	P	P
1454715_at	12	111	32	35	26	4375	3654	3957	3286	1086	290	96	3349		0710005M24Rik	RIKEN cDNA 0710005M24 gene	A	A	A	A	A	P	P	P	P	P	P	A	P
1435109_at	214	174	430	484	504	273	408	690	432	473	381	333	270		0710007G10Rik /// 3010001K23Rik	RIKEN cDNA 0710007G10 gene /// RIKEN cDNA 3010001K23 gene	P	A	P	P	P	P	P	P	P	P	P	P	P
1424311_at	6485	5495	6099	6569	5198	2459	3658	3603	2749	5160	5800	5220	3227		0710008K08Rik	RIKEN cDNA 0710008K08 gene	P	P	P	P	P	P	P	P	P	P	P	P	P
1423829_at	2134	3491	3514	4539	6647	4392	3736	5381	3925	3513	4888	4263	5238		0910001A06Rik	RIKEN cDNA 0910001A06 gene	P	P	P	P	P	P	P	P	P	P	P	P	P
1436088_at	381	1032	1550	1305	1955	4515	4211	2044	1855	1625	1428	965	2583		0910001A06Rik	RIKEN cDNA 0910001A06 gene	P	P	P	P	P	P	P	P	P	P	P	P	P
1434214_at	304	258	488	343	305	273	507	471	344	359	421	435	411		0910001L09Rik	RIKEN cDNA 0910001L09 gene	P	P	P	P	P	P	P	P	P	P	P	P	P
1436182_at	148	1220	765	485	437	3519	2334	1638	1322	1017	562	257	2479		10 days embryo whole body cDNA, RIKEN full-length enriched library, clone:2610306G12 product:unclassifiable, full insert sequence	10 days embryo whole body cDNA, RIKEN full-length enriched library, clone:2610306G12 product:unclassifiable, full insert sequence	P	P	P	P	P	P	P	P	P	P	P	P	P
1458060_at	126	122	81	101	90	80	101	124	202	81	876	2416	154		10 days lactation, adult female mammary gland cDNA, RIKEN full-length enriched library, clone:D730006C24 product:unclassifiable, full insert sequence	10 days lactation, adult female mammary gland cDNA, RIKEN full-length enriched library, clone:D730006C24 product:unclassifiable, full insert sequence	A	A	A	A	A	P	P	P	P	A	P	P	A
1460588_at	145	480	307	191	240	346	432	645	385	361	327	472	502		10 days lactation, adult female mammary gland cDNA, RIKEN full-length enriched library, clone:D730013G10 product:unclassifiable, full insert sequence	10 days lactation, adult female mammary gland cDNA, RIKEN full-length enriched library, clone:D730013G10 product:unclassifiable, full insert sequence	P	P	P	P	P	P	P	P	P	P	P	P	P
1442873_at	26	99	38	31	14	180	101	166	92	439	212	298	267		10 days neonate cerebellum cDNA, RIKEN full-length enriched library, clone:B930049N01 product:unclassifiable, full insert sequence	10 days neonate cerebellum cDNA, RIKEN full-length enriched library, clone:B930049N01 product:unclassifiable, full insert sequence	A	P	P	A	A	P	P	P	P	P	P	P	P
1440273_at	57	1680	396	199	128	92	143	105	105	447	129	51	112		10 days neonate cerebellum cDNA, RIKEN full-length enriched library, clone:B930073D03 product:hypothetical protein, full insert sequence	10 days neonate cerebellum cDNA, RIKEN full-length enriched library, clone:B930073D03 product:hypothetical protein, full insert sequence	P	P	P	P	P	P	P	P	P	P	P	A	P
1440027_at	160	481	256	186	213	438	352	286	318	360	447	444	374		10 days neonate cerebellum cDNA, RIKEN full-length enriched library, clone:B930082K12 product:unclassifiable, full insert sequence	10 days neonate cerebellum cDNA, RIKEN full-length enriched library, clone:B930082K12 product:unclassifiable, full insert sequence	A	P	P	P	A	P	P	P	P	P	P	P	P
1438310_at	126	360	134	122	70	2857	1514	2248	1829	434	191	43	3390		10 days neonate cerebellum cDNA, RIKEN full-length enriched library, clone:B930095L19 product:unclassifiable, full insert sequence	10 days neonate cerebellum cDNA, RIKEN full-length enriched library, clone:B930095L19 product:unclassifiable, full insert sequence	P	P	P	P	P	P	P	P	P	P	P	A	P
1458625_at	21	23	20	41	10	166	206	257	146	680	412	105	202		10 days neonate cortex cDNA, RIKEN full-length enriched library, clone:A830014C22 product:unclassifiable, full insert sequence	10 days neonate cortex cDNA, RIKEN full-length enriched library, clone:A830014C22 product:unclassifiable, full insert sequence	A	A	A	A	A	P	P	P	P	P	P	P	P
1442370_at	5	7	20	34	16	787	456	563	350	33	13	24	383		10 days neonate cortex cDNA, RIKEN full-length enriched library, clone:A830028E23 product:unclassifiable, full insert sequence	10 days neonate cortex cDNA, RIKEN full-length enriched library, clone:A830028E23 product:unclassifiable, full insert sequence	A	A	P	A	A	P	P	P	P	A	A	A	P
1456781_at	50	337	245	150	141	112	80	22	50	332	1103	1013	81		10 days neonate cortex cDNA, RIKEN full-length enriched library, clone:A830044L07 product:unclassifiable, full insert sequence	10 days neonate cortex cDNA, RIKEN full-length enriched library, clone:A830044L07 product:unclassifiable, full insert sequence	A	P	P	P	P	A	A	P	A	P	P	P	A
1455249_at	526	646	501	732	646	2182	1851	1880	1889	1182	1629	1270	2649		10 days neonate skin cDNA, RIKEN full-length enriched library, clone:4732480G12 product:unclassifiable, full insert sequence	10 days neonate skin cDNA, RIKEN full-length enriched library, clone:4732480G12 product:unclassifiable, full insert sequence	P	P	P	P	P	P	P	P	P	P	P	P	P
1440608_at	145	190	113	238	135	138	116	127	103	430	194	111	131		10 days neonate skin cDNA, RIKEN full-length enriched library, clone:4732488M12 product:unclassifiable, full insert sequence	10 days neonate skin cDNA, RIKEN full-length enriched library, clone:4732488M12 product:unclassifiable, full insert sequence	P	P	P	P	A	P	P	P	P	P	P	P	P
1454660_at	21	50	47	32	33	141	227	328	216	33	19	38	163		1100001E04Rik	RIKEN cDNA 1100001E04 gene	A	A	P	A	A	P	P	P	P	A	A	A	P
1427875_a_at	7490	6750	6214	4264	3625	3888	7215	4863	5600	8001	7294	6594	4451		1100001I22Rik	RIKEN cDNA 1100001I22 gene	P	P	P	P	P	P	P	P	P	P	P	P	P
1438655_a_at	12235	16043	12750	9833	7116	7249	14005	7123	9699	14781	14493	12619	11562		1100001I22Rik	RIKEN cDNA 1100001I22 gene	P	P	P	P	P	P	P	P	P	P	P	P	P
1423440_at	484	175	170	176	152	492	327	335	309	463	275	121	296		1110001A07Rik	RIKEN cDNA 1110001A07 gene	P	A	P	A	A	P	P	P	P	P	P	A	P
1437480_at	947	661	590	462	436	793	700	610	404	1315	1003	811	440		1110001A07Rik	RIKEN cDNA 1110001A07 gene	P	P	P	P	P	P	P	P	P	P	P	P	P
1435755_at	660	324	514	567	361	293	670	463	510	701	587	431	397		1110001A16Rik	RIKEN cDNA 1110001A16 gene	P	P	P	P	P	P	P	P	P	P	P	P	P
1416367_at	325	595	773	969	841	198	470	454	317	544	260	236	247		1110001J03Rik	RIKEN cDNA 1110001J03 gene	P	P	P	P	P	P	P	P	P	P	P	P	P
1434697_at	2221	3437	3834	2270	2435	1875	3667	2924	2976	3768	3969	3150	2797		1110001P04Rik	RIKEN cDNA 1110001P04 gene	P	P	P	P	P	P	P	P	P	P	P	P	P
1448388_a_at	6328	9671	8348	6133	6999	5740	3848	1832	3843	6032	8350	12071	4367		1110002B05Rik	RIKEN cDNA 1110002B05 gene	P	P	P	P	P	P	P	P	P	P	P	P	P
1447870_x_at	26	76	14	15	108	334	199	247	198	66	24	36	388		1110002E22Rik	RIKEN cDNA 1110002E22 gene	A	A	A	A	A	P	P	P	P	A	A	A	P
1423087_a_at	828	251	687	398	368	416	711	764	874	534	779	795	422		1110002E23Rik	RIKEN cDNA 1110002E23 gene	P	P	P	P	P	P	P	P	P	P	P	P	P
1437336_x_at	7422	3902	4483	5546	2874	6550	5704	6749	5299	3255	6064	7520	5684		1110002E23Rik	RIKEN cDNA 1110002E23 gene	P	P	P	P	P	P	P	P	P	P	P	P	P
1429484_at	137	106	137	206	284	161	249	154	164	206	272	254	223		1110002L01Rik	RIKEN cDNA 1110002L01 gene	P	A	A	P	P	P	A	P	P	P	P	P	P
1452256_at	469	296	272	355	557	218	237	175	292	279	188	176	434		1110002N22Rik	RIKEN cDNA 1110002N22 gene	P	P	P	P	P	P	P	P	P	P	P	P	P
1416767_a_at	7239	3478	3472	4573	4763	8929	5255	8376	6420	3311	5365	7953	7961		1110003E01Rik	RIKEN cDNA 1110003E01 gene	P	P	P	P	P	P	P	P	P	P	P	P	P
1416768_at	5575	2107	2564	4050	3876	3474	4014	5077	4697	3549	4197	6918	4676		1110003E01Rik	RIKEN cDNA 1110003E01 gene	P	P	P	P	P	P	P	P	P	P	P	P	P
1435464_at	2976	1645	2132	4430	3349	1797	2112	2468	2438	2862	2029	1536	2726		1110003E01Rik	RIKEN cDNA 1110003E01 gene	P	P	P	P	P	P	P	P	P	P	P	P	P
1429735_at	546	4986	1282	1472	2052	85	76	49	194	2022	3740	3798	314		1110003F05Rik	RIKEN cDNA 1110003F05 gene	P	P	P	P	P	P	A	P	P	P	P	P	P
1429736_at	251	1074	623	498	801	6	52	45	122	415	903	1164	300		1110003F05Rik	RIKEN cDNA 1110003F05 gene	P	P	P	P	P	A	A	A	P	P	P	P	P
1441964_at	398	2573	1073	931	1140	5	46	3	130	1553	2601	3402	261		1110003F05Rik	RIKEN cDNA 1110003F05 gene	P	P	P	P	P	A	A	P	P	P	P	P	P
1428926_at	448	425	567	900	1050	2149	1981	1787	1757	1567	1173	1840	1688		1110003O08Rik	RIKEN cDNA 1110003O08 gene	P	P	P	P	P	P	P	P	P	P	P	P	P
1429058_at	3730	1974	2255	1977	908	1065	1081	1386	1100	806	284	273	1120		1110004B13Rik	RIKEN cDNA 1110004B13 gene	P	P	P	P	P	P	P	P	P	P	P	P	P
1429059_s_at	504	176	339	273	162	136	211	326	258	146	84	62	201		1110004B13Rik	RIKEN cDNA 1110004B13 gene	P	P	P	P	P	A	P	P	P	A	A	A	A
1424315_at	1027	292	723	546	455	663	837	894	780	667	518	350	681		1110004E09Rik	RIKEN cDNA 1110004E09 gene	P	P	P	P	P	P	P	P	P	P	P	P	P
1437682_x_at	589	308	384	164	244	680	392	1178	408	191	207	192	543		1110004E09Rik	RIKEN cDNA 1110004E09 gene	P	P	P	P	P	P	P	P	P	P	P	P	P
1423335_at	1831	1668	1676	1688	1656	2586	2212	1731	1788	2353	2465	1893	1762		1110004F10Rik	RIKEN cDNA 1110004F10 gene	P	P	P	P	P	P	P	P	P	P	P	P	P
1451448_a_at	943	1135	1716	1782	1224	1015	1376	1157	1146	1944	1568	1408	1112		1110005A03Rik	RIKEN cDNA 1110005A03 gene	P	P	P	P	P	P	P	P	P	P	P	P	P
1453485_s_at	570	596	1116	948	788	589	1087	1043	809	1243	1031	988	621		1110005A03Rik	RIKEN cDNA 1110005A03 gene	P	P	P	P	P	P	P	P	P	P	P	P	P
1416095_x_at	2592	2665	2493	2004	1936	1779	2494	2093	2060	2612	3203	2920	2754		1110005A23Rik	RIKEN cDNA 1110005A23 gene	P	P	P	P	P	P	P	P	P	P	P	P	P
1456626_a_at	300	252	351	221	243	180	357	225	318	458	529	438	328		1110005A23Rik /// LOC625193 /// LOC636633	RIKEN cDNA 1110005A23 gene /// similar to cytokine induced protein 29 kDa /// similar to cytokine induced protein 29 kDa	P	P	P	P	P	P	P	P	P	P	P	P	P
1439438_a_at	2828	3777	2745	1858	2297	2352	2697	3301	2137	2008	2940	2617	3135		1110005A23Rik /// LOC625193 /// LOC636633	RIKEN cDNA 1110005A23 gene /// similar to cytokine induced protein 29 kDa /// similar to cytokine induced protein 29 kDa	P	P	P	P	P	P	P	P	P	P	P	P	P
1431094_at	154	310	94	64	32	946	846	757	614	275	79	20	186		1110006E14Rik	RIKEN cDNA 1110006E14 gene	P	P	P	A	A	P	P	P	P	P	A	A	P
1451143_at	249	209	330	259	284	279	521	552	708	695	425	254	325		1110006G06Rik	RIKEN cDNA 1110006G06 gene	P	P	P	P	P	P	P	P	P	P	P	P	P
1437451_at	75	48	67	18	70	36	305	54	821	129	48	63	128		1110006O17Rik	RIKEN cDNA 1110006O17 gene	P	A	P	A	A	A	P	P	P	P	A	A	P
1424348_at	512	455	658	546	508	339	537	293	434	780	507	514	226		1110007A13Rik	RIKEN cDNA 1110007A13 gene	P	P	P	P	P	P	A	P	P	P	P	P	P
1445884_at	98	463	141	117	121	283	166	153	140	259	195	149	124		1110007A13Rik	RIKEN cDNA 1110007A13 gene	A	P	P	A	A	P	P	P	P	P	P	P	A
1438254_at	395	1293	853	593	558	650	542	469	360	845	671	496	314		1110007A13Rik	RIKEN cDNA 1110007A13 gene	P	P	P	P	P	P	P	P	P	P	P	P	P
1429189_at	2559	1345	3176	5091	3318	1358	2544	3076	2622	19140	19460	8297	3796		1110007C02Rik	RIKEN cDNA 1110007C02 gene	P	P	P	P	P	P	P	P	P	P	P	P	P
1431359_a_at	759	203	289	364	198	79	179	209	249	184	1763	3536	205		1110007C09Rik	RIKEN cDNA 1110007C09 gene	P	P	P	P	P	A	P	P	P	P	P	P	P
1424354_at	79	59	6	18	60	19	61	16	191	17	32	13	64		1110007F12Rik	RIKEN cDNA 1110007F12 gene	P	A	A	A	A	A	A	P	P	A	A	A	A
1428528_at	1665	1897	1554	1660	1579	1389	1148	1189	1030	1642	1814	1973	1063		1110007L15Rik	RIKEN cDNA 1110007L15 gene	P	P	P	P	P	P	P	P	P	P	P	P	P
1451700_a_at	1335	1227	1580	750	730	964	2010	1714	1396	1028	1740	2764	997		1110007L15Rik	RIKEN cDNA 1110007L15 gene	P	P	P	P	P	P	P	P	P	P	P	P	P
1427997_at	2016	2029	1157	2013	2454	1574	945	833	1074	1126	1270	1107	1190		1110007M04Rik	RIKEN cDNA 1110007M04 gene	P	P	P	P	P	P	P	P	P	P	P	P	P
1435333_at	658	579	693	827	1346	1060	959	1106	751	461	362	299	1293		1110007M04Rik	RIKEN cDNA 1110007M04 gene	P	P	P	P	P	P	P	P	P	P	P	P	P
1452795_at	2089	1816	1653	1677	1881	531	1231	1381	1189	1510	1598	1575	770		1110008B24Rik	RIKEN cDNA 1110008B24 gene	P	P	P	P	P	P	P	P	P	P	P	P	P
1416699_at	11058	6711	11921	12530	11758	9307	8947	8436	7874	6739	7056	8001	7178		1110008F13Rik	RIKEN cDNA 1110008F13 gene	P	P	P	P	P	P	P	P	P	P	P	P	P
1436506_a_at	1036	2971	2175	893	1490	2930	2811	1843	1202	1930	3869	3074	1961		1110008H02Rik	RIKEN cDNA 1110008H02 gene	P	P	P	P	P	P	P	P	P	P	P	P	P
1419333_at	415	439	528	903	901	383	726	1185	866	696	506	477	605		1110008J03Rik	RIKEN cDNA 1110008J03 gene	P	P	P	P	P	P	P	P	P	P	P	P	P
1428775_at	352	90	176	154	186	210	219	176	287	277	177	55	208		1110008L16Rik	RIKEN cDNA 1110008L16 gene	P	A	P	P	A	P	A	P	A	P	P	A	P
1423947_at	277	49	113	98	120	115	291	398	247	60	75	46	177		1110008P14Rik	RIKEN cDNA 1110008P14 gene	P	A	P	P	A	P	P	P	P	A	A	A	P
1447982_at	303	108	329	154	292	576	322	422	288	146	193	444	392		1110008P14Rik	RIKEN cDNA 1110008P14 gene	P	A	P	P	P	P	P	P	P	A	P	P	P
1459890_s_at	3027	190	338	396	410	467	1353	2518	2009	245	327	440	1467		1110008P14Rik	RIKEN cDNA 1110008P14 gene	P	A	P	P	P	P	P	P	P	P	P	P	P
1435322_at	1921	1017	1666	2237	2389	544	496	985	1231	1149	1679	2110	1396		1110011C06Rik	RIKEN cDNA 1110011C06 gene	P	P	P	P	P	P	P	P	P	P	P	P	P
1433820_a_at	1745	1778	2598	3113	2627	174	226	132	419	1643	998	2248	331		1110012D08Rik	RIKEN cDNA 1110012D08 gene	P	P	P	P	P	P	A	P	P	P	P	P	P
1433821_at	1465	1532	2092	2600	1761	299	415	440	489	1750	1103	1605	412		1110012D08Rik	RIKEN cDNA 1110012D08 gene	P	P	P	P	P	P	P	P	P	P	P	P	P
1429053_at	236	471	508	1207	1058	2547	1224	1424	1264	1746	506	315	1544		1110012J17Rik	RIKEN cDNA 1110012J17 gene	P	P	P	P	P	P	P	P	P	P	P	P	P
1442363_at	126	175	147	176	183	420	237	278	262	292	113	115	202		1110012J17Rik	RIKEN cDNA 1110012J17 gene	A	A	A	A	A	P	P	P	P	P	A	A	A
1451302_at	1031	747	863	760	817	468	987	701	612	865	843	972	712		1110012L19Rik	RIKEN cDNA 1110012L19 gene	P	P	P	P	P	P	P	P	P	P	P	P	P
1424773_at	582	157	483	521	405	214	481	327	434	361	402	515	199		1110012M11Rik	RIKEN cDNA 1110012M11 gene	A	A	P	A	A	A	A	P	A	A	A	A	A
1437043_a_at	830	477	825	899	691	421	770	509	678	531	583	897	357		1110012M11Rik	RIKEN cDNA 1110012M11 gene	P	P	P	P	P	P	P	P	P	P	P	P	P
1455895_x_at	194	192	263	198	174	170	232	163	159	204	170	92	120		1110012M11Rik	RIKEN cDNA 1110012M11 gene	P	P	P	P	P	P	P	A	P	P	P	A	P
1454893_at	569	284	250	266	365	567	747	994	605	578	322	513	378		1110013L07Rik	RIKEN cDNA 1110013L07 gene	P	P	P	P	P	P	P	P	P	P	P	P	P
1424149_at	568	689	739	511	399	443	749	386	325	949	889	640	220		1110014D18Rik	RIKEN cDNA 1110014D18 gene	P	P	P	P	P	P	P	P	P	P	P	P	P
1448141_at	386	211	249	156	260	404	695	673	556	363	514	539	569		1110014J01Rik	RIKEN cDNA 1110014J01 gene	P	P	P	P	P	P	P	P	P	P	P	P	P
1436747_at	3283	3056	2153	2832	2112	2086	2405	1886	2963	3939	2615	2681	1730		1110014K08Rik /// LOC664786 /// LOC664849 /// LOC669054 /// LOC672175	RIKEN cDNA 1110014K08 gene /// hypothetical protein LOC664786 /// hypothetical protein LOC664849 /// hypothetical protein LOC669054 /// hypothetical protein LOC672175	P	P	P	P	P	P	P	P	P	P	P	P	P
1454825_at	686	684	1004	879	609	1487	1556	1296	1219	1012	767	793	753		1110014N23Rik	RIKEN cDNA 1110014N23 gene	P	P	P	P	P	P	P	P	P	P	P	P	P
1426943_at	715	808	894	1074	879	1087	1357	1156	995	1550	1098	1184	480		1110015K06Rik	RIKEN cDNA 1110015K06 gene	P	P	P	P	A	P	P	P	P	P	P	P	P
1443793_x_at	221	341	288	293	263	487	434	582	364	380	355	412	331		1110015K06Rik	RIKEN cDNA 1110015K06 gene	P	P	P	P	P	P	P	P	P	P	P	P	P
1429468_at	1111	773	1213	1729	1615	2097	1314	1750	1997	1194	1574	1949	1636		1110018F16Rik	RIKEN cDNA 1110018F16 gene	P	P	P	P	P	P	P	P	P	P	P	P	P
1433767_at	2017	2098	2574	2337	1781	3263	3028	3067	2545	2547	2386	2847	3099		1110018G07Rik	RIKEN cDNA 1110018G07 gene	P	P	P	P	P	P	P	P	P	P	P	P	P
1454721_at	220	168	343	226	185	369	406	411	369	321	235	295	273		1110018G07Rik	RIKEN cDNA 1110018G07 gene	P	P	P	P	P	P	P	P	P	P	P	P	P
1428655_at	916	1025	1074	1327	1199	1482	1520	1499	1516	2368	2974	3097	1237		1110018J12Rik	RIKEN cDNA 1110018J12 gene	P	P	P	P	P	P	P	P	P	P	P	P	P
1434441_at	1124	824	860	902	878	97	270	231	786	1204	679	361	334		1110018J18Rik	RIKEN cDNA 1110018J18 gene	P	P	P	P	P	P	P	P	P	P	P	P	P
1429024_at	533	803	639	445	630	98	107	132	203	263	113	66	221		1110018J23Rik	RIKEN cDNA 1110018J23 gene	P	P	P	P	P	P	A	P	P	P	A	A	P
1415733_a_at	1804	2391	1380	1726	1662	886	1347	1976	1142	1092	1373	1371	1425		1110019J04Rik	RIKEN cDNA 1110019J04 gene	P	P	P	P	P	P	P	P	P	P	P	P	P
1428874_at	2088	1558	1736	1707	1388	1253	1829	1562	1593	1584	2325	3108	1624		1110019N10Rik	RIKEN cDNA 1110019N10 gene	P	P	P	P	P	P	P	P	P	P	P	P	P
1437285_at	162	366	240	277	483	45	35	80	24	55	65	68	102		1110020G09Rik	RIKEN cDNA 1110020G09 gene	P	P	P	P	P	P	P	P	A	A	A	P	P
1437286_x_at	166	454	392	299	605	30	35	54	33	72	70	97	123		1110020G09Rik	RIKEN cDNA 1110020G09 gene	P	P	P	P	P	A	P	P	A	P	P	P	P
1437287_at	1585	2040	2985	4255	6092	763	291	295	433	934	737	1074	1388		1110020G09Rik	RIKEN cDNA 1110020G09 gene	P	P	P	P	P	P	P	P	P	P	P	P	P
1453422_a_at	168	197	313	264	471	71	56	84	82	81	94	153	111		1110020G09Rik	RIKEN cDNA 1110020G09 gene	P	P	P	P	P	P	P	P	P	P	P	P	P
1424277_at	325	896	819	431	432	425	506	111	194	700	552	210	187		1110020L19Rik	RIKEN cDNA 1110020L19 gene	P	P	P	P	P	P	A	P	A	P	P	A	P
1424364_a_at	759	567	872	1033	817	257	643	907	786	447	746	881	840		1110020P15Rik	RIKEN cDNA 1110020P15 gene	P	P	P	P	P	P	P	P	P	P	P	P	P
1434341_x_at	334	160	223	442	367	143	192	312	312	110	213	365	450		1110020P15Rik /// LOC622178	RIKEN cDNA 1110020P15 gene /// similar to ubiquinol-cytochrome c reductase complex 7.2kDa protein isoform a	P	A	P	P	P	A	P	P	P	P	P	P	P
1428795_at	1808	2393	2198	1850	1578	828	705	869	710	1680	597	104	718		1110021L09Rik	RIKEN cDNA 1110021L09 gene	P	P	P	P	P	P	P	P	P	P	P	P	P
1430530_s_at	125	181	235	60	81	293	545	184	188	571	517	2563	208		1110025F24Rik	RIKEN cDNA 1110025F24 gene	A	P	P	A	A	P	P	P	A	P	P	P	A
1453562_a_at	88	119	190	83	114	177	260	175	171	341	387	1700	134		1110025F24Rik	RIKEN cDNA 1110025F24 gene	A	A	P	A	A	A	A	P	A	P	P	P	A
1436214_at	315	1259	441	498	655	255	198	288	218	453	341	353	244		1110028C15Rik	RIKEN cDNA 1110028C15 gene	P	P	P	P	P	P	P	P	P	P	P	P	P
1455602_x_at	415	1090	569	596	723	236	182	263	264	503	295	286	380		1110028C15Rik	RIKEN cDNA 1110028C15 gene	P	P	P	P	P	P	P	P	P	P	P	P	P
1458128_at	120	382	153	201	215	106	98	270	85	120	93	140	65		1110028C15Rik	RIKEN cDNA 1110028C15 gene	A	P	P	P	P	A	P	P	A	A	A	A	A
1434338_at	897	771	977	892	1092	649	602	494	710	674	1014	1005	658		1110029E03Rik	RIKEN cDNA 1110029E03 gene	P	P	P	P	P	P	P	P	P	P	P	P	P
1455294_at	513	604	291	430	376	803	463	555	573	451	231	57	483		1110029L17Rik	RIKEN cDNA 1110029L17 gene	P	P	P	P	P	P	P	P	P	P	P	A	P
1455219_at	131	227	161	146	147	230	220	162	134	231	192	153	97		1110030E23Rik	RIKEN cDNA 1110030E23 gene	P	P	P	P	P	P	P	P	P	P	P	P	P
1423745_at	6733	894	2103	2406	1924	6333	11337	12917	10261	3733	2685	2780	8424		1110031B06Rik	RIKEN cDNA 1110031B06 gene	P	P	P	P	P	P	P	P	P	P	P	P	P
1438176_x_at	21350	8720	8396	11601	9619	19360	22373	20811	22438	11844	11253	9364	21097		1110031B06Rik	RIKEN cDNA 1110031B06 gene	P	P	P	P	P	P	P	P	P	P	P	P	P
1418331_at	670	929	2078	1825	1267	412	717	663	732	2141	1339	1648	637		1110031I02Rik	RIKEN cDNA 1110031I02 gene	P	P	P	P	P	P	P	P	P	P	P	P	P
1417211_a_at	2423	336	1239	1461	1083	217	521	595	869	828	1506	3809	678		1110032A03Rik	RIKEN cDNA 1110032A03 gene	P	P	P	P	P	P	P	P	P	P	P	P	P
1428520_at	1039	837	1330	1135	1018	900	1597	1094	1022	1158	897	777	702		1110032A13Rik	RIKEN cDNA 1110032A13 gene	P	P	P	P	P	P	P	P	P	P	P	P	P
1416805_at	501	53	55	53	40	163	162	266	176	140	78	28	230		1110032E23Rik	RIKEN cDNA 1110032E23 gene	P	P	P	A	A	P	P	P	P	P	P	A	P
1456509_at	8	351	431	62	37	259	187	607	344	208	57	10	532		1110032F04Rik	RIKEN cDNA 1110032F04 gene	A	P	P	A	A	P	P	P	P	P	A	A	P
1424497_at	865	490	792	670	554	433	414	386	382	693	830	1277	447		1110032O16Rik	RIKEN cDNA 1110032O16 gene	P	P	P	P	P	P	P	P	P	P	P	P	P
1435984_at	63	920	149	150	191	450	133	170	102	489	424	250	42		1110033F14Rik	RIKEN cDNA 1110033F14 gene	P	P	P	P	P	P	P	P	P	P	P	P	A
1452730_at	148	77	219	168	34	157	883	236	490	293	229	199	175		1110033J19Rik	RIKEN cDNA 1110033J19 gene	P	A	P	P	A	P	A	P	P	P	P	A	P
1419889_at	44	333	302	137	53	24	22	25	31	22	10	17	21		1110033M05Rik	RIKEN cDNA 1110033M05 gene	P	P	P	P	A	A	A	A	A	A	A	A	A
1454723_at	1124	2073	1971	2193	2059	1863	1163	1043	733	1318	1856	2440	1110		1110033M05Rik	RIKEN cDNA 1110033M05 gene	P	P	P	P	P	P	P	P	P	P	P	P	P
1453183_at	200	171	150	117	149	137	198	145	114	242	168	157	159		1110034A24Rik	RIKEN cDNA 1110034A24 gene	P	P	P	P	P	P	P	P	P	P	P	P	P
1454968_at	247	136	205	95	103	287	227	181	141	207	179	222	154		1110034A24Rik	RIKEN cDNA 1110034A24 gene	P	P	P	P	P	P	P	P	P	P	P	P	P
1434692_at	584	781	798	1009	1086	806	640	543	523	1035	677	555	567		1110034B05Rik	RIKEN cDNA 1110034B05 gene	P	P	P	P	P	P	P	P	P	P	P	P	P
1435742_at	137	200	272	170	188	140	135	193	169	260	230	178	115		1110034C04Rik	RIKEN cDNA 1110034C04 gene	P	P	P	P	P	P	A	P	P	P	P	P	P
1437617_x_at	254	227	271	288	330	218	367	372	568	545	232	238	201		1110034G24Rik	RIKEN cDNA 1110034G24 gene	P	P	P	P	P	P	P	P	P	P	P	P	P
1452888_at	151	93	221	232	247	131	203	212	282	281	203	209	128		1110034G24Rik	RIKEN cDNA 1110034G24 gene	P	P	P	P	P	P	P	P	P	P	P	P	P
1453013_at	866	1009	1161	926	923	667	542	532	637	1705	1856	1438	465		1110034O07Rik	RIKEN cDNA 1110034O07 gene	P	P	P	P	P	P	P	P	P	P	P	P	P
1455288_at	674	309	910	525	424	96	226	132	150	480	390	1210	144		1110036O03Rik	RIKEN cDNA 1110036O03 gene	P	P	P	P	P	A	A	P	A	P	P	P	A
1427906_at	1100	585	681	602	640	329	350	317	572	849	667	445	581		1110037F02Rik	RIKEN cDNA 1110037F02 gene	P	P	P	P	P	P	P	P	P	P	P	P	P
1427907_at	1214	1339	844	834	992	652	549	591	829	919	818	787	1074		1110037F02Rik	RIKEN cDNA 1110037F02 gene	P	P	P	P	P	P	P	P	P	P	P	P	P
1441081_a_at	1374	856	725	422	442	802	872	407	437	1025	1046	605	168		1110038B12Rik	RIKEN cDNA 1110038B12 gene	P	P	P	P	P	P	P	P	P	P	P	P	P
1428071_at	429	498	828	775	634	533	594	620	620	687	668	813	412		1110038D17Rik	RIKEN cDNA 1110038D17 gene	P	P	P	P	P	P	P	P	P	P	P	P	P
1416885_at	1110	930	1312	992	746	449	742	582	657	1547	1082	752	649		1110038F14Rik	RIKEN cDNA 1110038F14 gene	P	P	P	P	P	P	P	P	P	P	P	P	P
1435842_at	281	2676	2516	2262	2271	1477	1244	2957	2567	2046	951	223	4760		1110038O08Rik	RIKEN cDNA 1110038O08 gene	P	P	P	P	P	P	P	P	P	P	P	P	P
1436702_at	184	275	582	937	1036	493	391	889	714	535	177	68	666		1110038O08Rik	RIKEN cDNA 1110038O08 gene	P	P	P	P	P	P	P	P	P	P	P	A	P
1424805_a_at	406	268	393	337	178	275	409	498	525	541	465	384	165		1110039B18Rik	RIKEN cDNA 1110039B18 gene	A	A	A	A	A	A	P	P	P	P	A	P	A
1424806_s_at	416	358	635	439	406	316	620	677	666	808	694	612	305		1110039B18Rik	RIKEN cDNA 1110039B18 gene	P	P	P	P	P	P	P	P	P	P	P	P	P
1442371_at	354	536	558	509	548	980	1164	779	703	924	417	371	900		1110048D14Rik	RIKEN cDNA 1110048D14 gene	P	P	P	P	P	P	P	P	P	P	P	P	P
1428675_at	2457	819	944	1583	1650	1798	1799	4010	3356	1582	1740	3127	2084		1110049F12Rik	RIKEN cDNA 1110049F12 gene	P	P	P	P	P	P	P	P	P	P	P	P	P
1449213_at	1908	987	1619	1343	1115	524	922	889	737	1519	1831	1596	516		1110049G11Rik	RIKEN cDNA 1110049G11 gene	P	P	P	P	P	P	P	P	P	P	P	P	P
1429099_at	56	607	383	264	284	123	109	60	79	377	290	303	70		1110051B16Rik	RIKEN cDNA 1110051B16 gene	A	P	P	P	P	A	P	P	A	P	P	P	P
1445710_x_at	115	1925	868	788	686	164	223	89	71	1009	948	776	130		1110051B16Rik	RIKEN cDNA 1110051B16 gene	A	P	P	P	P	P	A	P	A	P	P	P	P
1428501_at	1834	718	878	1023	1089	1389	2023	1973	1737	1214	988	997	1481		1110051M20Rik	RIKEN cDNA 1110051M20 gene	P	P	P	P	P	P	P	P	P	P	P	P	P
1447228_at	156	308	202	256	380	397	262	319	300	145	182	272	272		1110051M20Rik	RIKEN cDNA 1110051M20 gene	P	P	P	P	P	P	P	P	P	P	P	P	P
1447229_x_at	116	251	145	162	306	223	224	274	244	126	134	204	261		1110051M20Rik	RIKEN cDNA 1110051M20 gene	P	P	P	P	P	P	P	P	P	P	P	P	P
1436187_at	243	163	287	613	490	20	21	29	36	175	26	28	77		1110054M08Rik	RIKEN cDNA 1110054M08 gene	P	P	P	P	P	A	A	A	A	P	A	A	A
1429087_at	201	314	140	166	173	526	517	790	581	329	283	166	671		1110054O05Rik	RIKEN cDNA 1110054O05 gene	P	P	P	P	P	P	P	P	P	P	P	P	P
1429242_at	141	213	208	92	138	284	218	300	193	221	202	210	278		1110054O05Rik	RIKEN cDNA 1110054O05 gene	P	P	P	P	P	P	P	P	P	P	P	P	P
1429243_at	222	226	214	210	284	157	179	232	217	317	346	308	371		1110054O05Rik	RIKEN cDNA 1110054O05 gene	P	A	P	A	A	A	A	A	A	P	P	A	A
1428085_at	2220	1158	1674	1902	2312	1258	1823	2056	1389	1559	3242	5587	1781		1110057K04Rik	RIKEN cDNA 1110057K04 gene	P	P	P	P	P	P	P	P	P	P	P	P	P
1436519_a_at	930	527	422	1153	1112	799	504	524	481	621	1331	2559	695		1110057K04Rik	RIKEN cDNA 1110057K04 gene	P	P	P	P	P	P	P	P	P	P	P	P	P
1418327_at	901	680	576	919	969	390	860	929	712	598	875	817	949		1110058L19Rik	RIKEN cDNA 1110058L19 gene	P	P	P	P	P	P	P	P	P	P	P	P	P
1416841_at	1390	1855	1215	1248	1505	952	924	1255	1084	894	858	1125	1264		1110059E24Rik	RIKEN cDNA 1110059E24 gene	P	P	P	P	P	P	P	P	P	P	P	P	P
1436203_a_at	64	85	288	232	113	27	25	70	110	6	9	13	43		1110059G02Rik	RIKEN cDNA 1110059G02 gene	P	P	P	P	P	P	P	P	P	A	A	A	P
1436204_at	162	127	490	365	170	64	110	143	248	13	13	22	93		1110059G02Rik	RIKEN cDNA 1110059G02 gene	P	P	P	P	P	A	P	P	P	A	A	A	P
1418048_at	2042	1203	1082	910	1105	1402	1304	1731	1567	1704	1416	1602	1930		1110059G10Rik	RIKEN cDNA 1110059G10 gene	P	P	P	P	P	P	P	P	P	P	P	P	P
1429107_at	380	433	407	453	455	347	455	511	579	610	794	937	490		1110059H15Rik	RIKEN cDNA 1110059H15 gene	P	P	P	P	P	P	P	P	P	P	P	P	P
1453029_s_at	2168	3129	2018	1522	1984	3025	2166	3555	2829	2073	3378	4135	2654		1110059H15Rik	RIKEN cDNA 1110059H15 gene	P	P	P	P	P	P	P	P	P	P	P	P	P
1460455_at	795	1901	1163	902	1467	4717	2128	4275	3243	922	1629	2014	4764		1110059H15Rik	RIKEN cDNA 1110059H15 gene	P	P	P	P	P	P	P	P	P	P	P	P	P
1415722_a_at	4113	3854	3689	3948	3867	2970	2723	2103	2273	2027	2598	3471	2796		1110059P08Rik	RIKEN cDNA 1110059P08 gene	P	P	P	P	P	P	P	P	P	P	P	P	P
1441646_at	220	200	196	207	188	212	206	173	134	148	196	155	146		1110059P08Rik	RIKEN cDNA 1110059P08 gene	P	P	P	P	A	P	P	P	P	P	P	P	P
1430291_at	500	61	39	79	64	203	189	182	105	48	157	1438	187		1110060D06Rik /// Dock5	RIKEN cDNA 1110060D06 gene /// dedicator of cytokinesis 5	P	A	A	A	A	P	A	P	P	A	P	P	P
1436796_at	366	1024	702	611	711	655	762	599	575	517	359	195	481		1110061A14Rik	RIKEN cDNA 1110061A14 gene	P	P	P	P	P	P	P	P	P	P	P	P	P
1435105_at	218	187	262	209	85	1353	1971	1864	1545	1435	1152	1119	697		1110061N23Rik	RIKEN cDNA 1110061N23 gene	A	A	P	P	A	P	P	P	P	P	P	P	P
1425066_a_at	370	547	525	509	505	481	534	419	401	628	575	712	292		1110061O04Rik	RIKEN cDNA 1110061O04 gene	P	P	P	P	P	P	P	P	P	P	P	P	P
1455040_s_at	13	33	11	2	18	90	138	308	311	25	293	71	357		1110062M06Rik	RIKEN cDNA 1110062M06 gene	A	A	A	A	A	P	P	P	P	A	P	A	P
1439543_at	20	13	34	114	93	31	370	21	951	8	22	32	178		1110064A23Rik	RIKEN cDNA 1110064A23 gene	A	A	A	A	A	A	A	P	P	A	A	A	A
1435160_at	1694	1694	1868	1541	1758	4355	3642	1572	1801	3207	3339	3913	1933		1110064P04Rik	RIKEN cDNA 1110064P04 gene	P	P	P	P	P	P	P	P	P	P	P	P	P
1452893_s_at	497	363	2563	4114	2910	412	1196	676	538	1225	436	231	564		1110065P19Rik /// 2310040A07Rik	RIKEN cDNA 1110065P19 gene /// RIKEN cDNA 2310040A07 gene	P	P	P	P	P	P	P	P	P	P	P	P	P
1455545_at	1464	1760	3283	2418	2070	1535	3122	2176	1779	2014	2411	3600	1882		1110065P20Rik	RIKEN cDNA 1110065P20 gene	P	P	P	P	P	P	P	P	P	P	P	P	P
1424318_at	6679	9689	6360	8825	11029	5073	5501	5722	4979	6490	1516	223	6745		1110067D22Rik	RIKEN cDNA 1110067D22 gene	P	P	P	P	P	P	P	P	P	P	P	P	P
1451313_a_at	3862	7406	3979	3326	6982	5098	3127	5530	2840	2469	1191	215	5804		1110067D22Rik	RIKEN cDNA 1110067D22 gene	P	P	P	P	P	P	P	P	P	P	P	P	P
1424058_at	574	542	542	400	402	280	413	225	316	504	528	560	84		1190002C06Rik	RIKEN cDNA 1190002C06 gene	P	P	P	P	A	P	A	P	P	P	P	P	A
1429652_at	966	1554	813	1091	958	1111	1029	886	734	1233	1001	955	863		1190002C06Rik	RIKEN cDNA 1190002C06 gene	P	P	P	P	P	P	P	P	P	P	P	P	P
1418003_at	509	498	1511	2289	2094	85	166	132	1113	2711	750	79	348		1190002H23Rik	RIKEN cDNA 1190002H23 gene	P	P	P	P	P	P	P	P	P	P	P	A	P
1438511_a_at	212	432	411	363	814	57	76	132	431	3244	1415	95	309		1190002H23Rik	RIKEN cDNA 1190002H23 gene	P	P	P	P	P	P	P	P	P	P	P	P	P
1435620_at	600	574	507	488	537	918	1286	1385	1036	762	769	853	1095		1190002J23Rik	RIKEN cDNA 1190002J23 gene	P	P	P	P	P	P	P	P	P	P	P	P	P
1433581_at	914	794	651	596	581	695	556	998	725	806	1612	1761	1728		1190002N15Rik	RIKEN cDNA 1190002N15 gene	P	P	P	P	P	P	P	P	P	P	P	P	P
1433582_at	562	467	346	395	337	980	558	727	551	435	869	947	751		1190002N15Rik	RIKEN cDNA 1190002N15 gene	P	P	P	P	P	P	P	P	P	P	P	P	P
1426879_at	439	115	222	284	373	215	225	418	339	415	206	183	361		1190005F20Rik	RIKEN cDNA 1190005F20 gene	P	P	P	P	P	P	P	P	P	P	P	P	P
1452609_at	227	138	425	1196	681	127	186	25	61	33	89	224	183		1190005I06Rik	RIKEN cDNA 1190005I06 gene	P	A	P	P	P	A	A	P	A	A	P	P	A
1428475_at	1276	793	1090	780	746	1112	1552	1789	1555	960	1911	1402	1555		1190005P17Rik	RIKEN cDNA 1190005P17 gene	P	P	P	P	P	P	P	P	P	P	P	P	P
1456641_at	994	91	140	235	195	119	94	46	61	141	385	1044	153		1190007F08Rik	RIKEN cDNA 1190007F08 gene	P	A	P	P	A	A	A	A	A	A	P	P	A
1417402_at	1120	539	1067	1016	927	184	352	426	547	972	867	603	480		1190017O12Rik	RIKEN cDNA 1190017O12 gene	P	P	P	P	P	A	A	P	P	P	P	P	P
1441368_at	121	463	684	1558	1666	45	33	38	36	33	16	46	247		12 days embryo embryonic body between diaphragm region and neck cDNA, RIKEN full-length enriched library, clone:9430084D06 product:unclassifiable, full insert sequence	12 days embryo embryonic body between diaphragm region and neck cDNA, RIKEN full-length enriched library, clone:9430084D06 product:unclassifiable, full insert sequence	P	P	P	P	P	A	A	A	A	A	A	A	P
1441716_at	63	323	117	168	252	926	247	187	197	188	135	177	491		12 days embryo eyeball cDNA, RIKEN full-length enriched library, clone:D230024G22 product:unclassifiable, full insert sequence	12 days embryo eyeball cDNA, RIKEN full-length enriched library, clone:D230024G22 product:unclassifiable, full insert sequence	A	P	P	P	P	P	P	P	P	P	A	P	P
1441108_at	40	465	99	121	131	243	91	65	92	220	142	86	46		12 days embryo eyeball cDNA, RIKEN full-length enriched library, clone:D230035N06 product:unclassifiable, full insert sequence	12 days embryo eyeball cDNA, RIKEN full-length enriched library, clone:D230035N06 product:unclassifiable, full insert sequence	A	P	P	P	P	P	P	P	P	P	P	P	P
1436692_at	95	451	267	181	166	184	113	46	81	446	2065	2477	287		12 days embryo head cDNA, RIKEN full-length enriched library, clone:3000003N14 product:hypothetical protein, full insert sequence	12 days embryo head cDNA, RIKEN full-length enriched library, clone:3000003N14 product:hypothetical protein, full insert sequence	P	P	P	P	P	P	P	P	P	P	P	P	P
1436592_at	81	363	136	25	89	315	412	292	216	418	161	70	316		12 days embryo head cDNA, RIKEN full-length enriched library, clone:3010015L05 product:unclassifiable, full insert sequence	12 days embryo head cDNA, RIKEN full-length enriched library, clone:3010015L05 product:unclassifiable, full insert sequence	A	P	P	A	P	P	P	P	P	P	P	A	P
1458271_at	7	136	33	12	34	630	557	347	235	16	5	14	251		12 days embryo spinal cord cDNA, RIKEN full-length enriched library, clone:C530003P15 product:unclassifiable, full insert sequence	12 days embryo spinal cord cDNA, RIKEN full-length enriched library, clone:C530003P15 product:unclassifiable, full insert sequence	A	P	A	A	A	P	P	P	P	A	A	A	P
1439035_at	305	325	222	249	270	1038	481	588	506	431	349	203	826		12 days embryo spinal cord cDNA, RIKEN full-length enriched library, clone:C530050B12 product:unclassifiable, full insert sequence	12 days embryo spinal cord cDNA, RIKEN full-length enriched library, clone:C530050B12 product:unclassifiable, full insert sequence	P	P	P	P	P	P	P	P	P	P	P	P	P
1439632_at	39	232	145	191	126	1179	1070	679	672	721	3063	2331	650		12 days embryo spinal ganglion cDNA, RIKEN full-length enriched library, clone:D130046A02 product:unclassifiable, full insert sequence	12 days embryo spinal ganglion cDNA, RIKEN full-length enriched library, clone:D130046A02 product:unclassifiable, full insert sequence	A	P	P	P	A	P	P	P	P	P	P	P	P
1444180_at	129	461	252	492	801	241	158	172	173	331	299	179	148		12 days embryo spinal ganglion cDNA, RIKEN full-length enriched library, clone:D130055E11 product:unclassifiable, full insert sequence	12 days embryo spinal ganglion cDNA, RIKEN full-length enriched library, clone:D130055E11 product:unclassifiable, full insert sequence	A	P	P	P	P	A	A	A	A	P	A	A	A
1456953_at	39	70	66	75	16	1353	894	1150	964	226	87	62	1124		12 days embryo spinal ganglion cDNA, RIKEN full-length enriched library, clone:D130062H10 product:unclassifiable, full insert sequence	12 days embryo spinal ganglion cDNA, RIKEN full-length enriched library, clone:D130062H10 product:unclassifiable, full insert sequence	A	P	A	A	A	P	P	P	P	P	A	A	P
1441127_at	479	2635	1413	1953	3021	325	276	297	272	1864	826	132	855		12 days embryo spinal ganglion cDNA, RIKEN full-length enriched library, clone:D130065D02 product:unclassifiable, full insert sequence	12 days embryo spinal ganglion cDNA, RIKEN full-length enriched library, clone:D130065D02 product:unclassifiable, full insert sequence	P	P	P	P	P	P	P	P	P	P	P	P	P
1439990_at	271	525	363	300	266	1469	1064	1636	826	2703	753	108	1072		12 days embryo spinal ganglion cDNA, RIKEN full-length enriched library, clone:D130065P14 product:unclassifiable, full insert sequence	12 days embryo spinal ganglion cDNA, RIKEN full-length enriched library, clone:D130065P14 product:unclassifiable, full insert sequence	P	P	P	P	P	P	P	P	P	P	P	A	P
1424106_at	3339	2537	2609	4175	4024	2682	2879	3463	2689	2366	2960	2842	2880		1200003C05Rik	RIKEN cDNA 1200003C05 gene	P	P	P	P	P	P	P	P	P	P	P	P	P
1441959_s_at	9254	8240	7285	11153	10921	7464	6063	5712	7110	8657	10260	9888	7299		1200003C05Rik	RIKEN cDNA 1200003C05 gene	P	P	P	P	P	P	P	P	P	P	P	P	P
1451238_at	4370	3531	3274	5343	4816	3553	3262	3505	3413	3773	4277	4419	4037		1200003C05Rik	RIKEN cDNA 1200003C05 gene	P	P	P	P	P	P	P	P	P	P	P	P	P
1429473_at	182	252	208	129	214	190	168	138	178	251	211	230	214		1200003I07Rik	RIKEN cDNA 1200003I07 gene	P	P	P	P	P	P	P	P	P	P	P	P	P
1427932_s_at	856	524	462	575	629	944	477	305	681	386	180	145	470		1200003I10Rik /// 1200015M12Rik /// 1200016E24Rik /// A130040M12Rik /// E430024C06Rik	RIKEN cDNA 1200003I10 gene /// RIKEN cDNA 1200015M12 gene /// RIKEN cDNA 1200016E24 gene /// RIKEN cDNA A130040M12 gene /// RIKEN cDNA E430024C06 gene	P	A	P	P	A	P	A	P	P	P	A	A	P
1423887_a_at	239	530	333	262	360	605	601	691	462	517	449	370	318		1200003M09Rik	RIKEN cDNA 1200003M09 gene	P	P	P	P	P	P	P	P	P	P	P	A	P
1423888_at	206	412	365	289	308	649	576	473	400	766	524	317	142		1200003M09Rik	RIKEN cDNA 1200003M09 gene	A	A	P	P	A	P	A	P	A	P	P	A	A
1456579_x_at	97	200	227	158	177	405	368	306	212	299	230	141	186		1200003M09Rik	RIKEN cDNA 1200003M09 gene	P	P	P	A	P	P	P	P	P	P	P	A	P
1432848_a_at	2382	424	699	667	677	114	138	192	262	1258	3003	6075	477		1200004M23Rik	RIKEN cDNA 1200004M23 gene	P	P	P	P	P	P	P	P	P	P	P	P	P
1451486_at	170	106	298	514	550	44	143	109	568	610	196	163	212		1200006F02Rik	RIKEN cDNA 1200006F02 gene	P	P	P	P	P	P	P	P	P	P	P	P	P
1417768_at	3353	4822	4036	4215	5092	3529	2557	2838	3154	2294	2628	3142	5885		1200006O19Rik	RIKEN cDNA 1200006O19 gene	P	P	P	P	P	P	P	P	P	P	P	P	P
1457355_at	108	183	179	228	187	495	216	289	180	148	177	178	367		1200006O19Rik	RIKEN cDNA 1200006O19 gene	A	P	P	P	A	P	P	P	P	A	P	A	P
1418134_at	4593	3731	3776	4641	5809	8781	4347	5561	5688	3988	4785	6512	8904		1200007B05Rik	RIKEN cDNA 1200007B05 gene	P	P	P	P	P	P	P	P	P	P	P	P	P
1448970_at	2185	2124	2550	3285	3682	3253	2149	3077	2796	1626	1981	2514	3981		1200007B05Rik	RIKEN cDNA 1200007B05 gene	P	P	P	P	P	P	P	P	P	P	P	P	P
1423333_at	618	275	406	368	293	227	375	253	261	391	330	284	188		1200007D18Rik	RIKEN cDNA 1200007D18 gene	P	P	P	P	P	P	P	P	P	P	P	P	P
1423334_at	252	83	175	100	44	68	228	211	158	194	133	10	69		1200007D18Rik	RIKEN cDNA 1200007D18 gene	P	A	P	P	A	P	P	P	P	P	A	A	P
1437908_a_at	3518	3169	3088	1948	2182	4904	3695	4062	2588	1729	1042	211	4127		1200007D18Rik	RIKEN cDNA 1200007D18 gene	P	P	P	P	P	P	P	P	P	P	P	P	P
1438793_x_at	272	203	193	161	225	210	216	428	290	174	219	146	314		1200007D18Rik	RIKEN cDNA 1200007D18 gene	A	P	P	A	A	P	P	A	A	A	A	A	P
1429065_at	1267	847	1467	1370	1530	50	135	144	248	621	409	347	357		1200009F10Rik	RIKEN cDNA 1200009F10 gene	P	P	P	P	P	P	P	P	P	P	P	P	P
1429219_at	1156	996	910	845	623	95	156	127	179	379	419	273	150		1200009F10Rik	RIKEN cDNA 1200009F10 gene	P	P	P	P	P	P	P	P	P	P	P	P	A
1428420_a_at	118	73	87	253	248	21	19	18	42	45	10	4	42		1200009I06Rik	RIKEN cDNA 1200009I06 gene	P	A	A	P	P	A	A	A	A	A	A	A	A
1428922_at	285	7257	12464	14936	14001	151	283	93	322	7579	3940	629	1228		1200009O22Rik	RIKEN cDNA 1200009O22 gene	P	P	P	P	P	P	P	P	P	P	P	P	P
1452961_at	164	1840	4253	4983	5399	93	124	198	221	2568	1003	181	424		1200009O22Rik	RIKEN cDNA 1200009O22 gene	P	P	P	P	P	P	P	P	P	P	P	P	P
1454998_at	1063	743	574	783	768	1370	1144	1311	1202	710	708	785	1358		1200011I18Rik	RIKEN cDNA 1200011I18 gene	P	P	P	P	P	P	P	P	P	P	P	P	P
1427737_a_at	254	276	185	162	224	231	265	387	266	272	200	215	370		1200011M11Rik	RIKEN cDNA 1200011M11 gene	P	P	P	P	P	P	P	P	P	P	P	P	P
1428144_at	724	483	592	384	380	457	588	379	355	802	350	261	275		1200011O22Rik	RIKEN cDNA 1200011O22 gene	P	P	P	P	P	P	P	P	P	P	P	P	P
1437194_x_at	1378	1171	897	556	527	786	894	489	506	1128	640	230	494		1200011O22Rik	RIKEN cDNA 1200011O22 gene	P	P	P	P	P	P	P	P	P	P	P	P	P
1415721_a_at	863	716	1327	1253	1034	1404	1479	1390	1609	1595	1256	1035	1090		1200013P24Rik	RIKEN cDNA 1200013P24 gene	P	P	P	P	P	P	P	P	P	P	P	P	P
1423118_at	362	320	267	253	313	307	364	292	328	479	271	228	250		1200014J11Rik	RIKEN cDNA 1200014J11 gene	P	A	P	P	A	A	A	P	P	P	A	A	A
1439363_at	37	121	34	68	105	119	84	79	63	248	254	116	51		1200014J11Rik	RIKEN cDNA 1200014J11 gene	A	P	A	A	P	P	A	P	A	P	P	P	A
1419264_at	367	383	369	489	280	312	305	385	321	433	362	396	373		1200014M14Rik	RIKEN cDNA 1200014M14 gene	P	P	P	P	P	P	P	P	P	P	P	P	P
1419265_at	438	363	431	297	263	291	384	413	274	456	402	327	250		1200014M14Rik	RIKEN cDNA 1200014M14 gene	P	P	P	P	A	P	P	P	P	P	P	P	P
1451172_at	14026	12798	10980	15748	12913	7271	8070	9698	9946	8841	11277	16910	8464		1200015A19Rik	RIKEN cDNA 1200015A19 gene	P	P	P	P	P	P	P	P	P	P	P	P	P
1428196_a_at	1700	1971	2118	2394	1717	2181	1752	1997	2172	2553	3171	3289	2912		1200015F23Rik	RIKEN cDNA 1200015F23 gene	P	P	P	P	P	P	P	P	P	P	P	P	P
1452704_at	577	545	719	544	631	949	874	1810	956	746	774	880	1003		1200015F23Rik	RIKEN cDNA 1200015F23 gene	P	P	P	P	P	P	P	P	P	P	P	P	P
1435137_s_at	343	252	290	224	292	394	267	112	466	188	127	127	325		1200015M12Rik /// 1200016E24Rik /// A130040M12Rik /// E430024C06Rik	RIKEN cDNA 1200015M12 gene /// RIKEN cDNA 1200016E24 gene /// RIKEN cDNA A130040M12 gene /// RIKEN cDNA E430024C06 gene	P	P	P	P	P	P	P	P	P	P	P	A	P
1430141_at	29	47	90	67	71	47	34	46	55	38	155	242	48		1200015N20Rik	RIKEN cDNA 1200015N20 gene	A	A	P	A	A	A	A	A	A	A	P	P	A
1448557_at	419	3922	3474	6763	8384	1508	927	1613	1933	1626	2906	1547	2504		1200015N20Rik	RIKEN cDNA 1200015N20 gene	P	P	P	P	P	P	P	P	P	P	P	P	P
1460476_s_at	21	185	437	515	635	84	98	79	139	153	570	328	143		1200015N20Rik	RIKEN cDNA 1200015N20 gene	A	P	P	P	P	A	A	P	A	A	P	P	P
1436761_s_at	121	1935	1298	722	2485	425	275	674	544	367	789	335	1118		1200015N20Rik	RIKEN cDNA 1200015N20 gene	P	P	P	P	P	P	P	P	P	P	P	P	P
1428654_at	346	337	333	424	564	275	232	254	271	397	398	465	325		1200016B10Rik	RIKEN cDNA 1200016B10 gene	P	P	P	P	P	P	P	P	P	P	P	P	P
1452859_at	250	219	190	281	380	112	107	167	182	267	279	323	260		1200016B10Rik	RIKEN cDNA 1200016B10 gene	P	A	P	P	P	A	A	A	A	P	P	P	P
1423486_at	3257	1909	1999	2903	3069	2091	2823	2413	2057	2014	3020	4286	3271		1200020A08Rik	RIKEN cDNA 1200020A08 gene	P	P	P	P	P	P	P	P	P	P	P	P	P
1455150_at	60	21	17	35	10	417	267	694	406	247	93	257	757		13 days embryo forelimb cDNA, RIKEN full-length enriched library, clone:5930438H13 product:unclassifiable, full insert sequence	13 days embryo forelimb cDNA, RIKEN full-length enriched library, clone:5930438H13 product:unclassifiable, full insert sequence	P	P	A	A	A	P	P	P	P	P	P	P	P
1436464_at	47	62	58	76	50	63	81	174	115	83	64	305	33		13 days embryo heart cDNA, RIKEN full-length enriched library, clone:D330003D13 product:unclassifiable, full insert sequence	13 days embryo heart cDNA, RIKEN full-length enriched library, clone:D330003D13 product:unclassifiable, full insert sequence	A	A	P	A	A	P	P	P	P	P	A	P	A
1454910_at	156	137	153	120	164	286	156	215	119	180	193	179	160		13 days embryo heart cDNA, RIKEN full-length enriched library, clone:D330008M10 product:hypothetical protein, full insert sequence	13 days embryo heart cDNA, RIKEN full-length enriched library, clone:D330008M10 product:hypothetical protein, full insert sequence	P	P	P	P	P	P	P	P	P	P	P	P	P
1440516_at	17	86	10	8	10	468	434	971	567	351	143	9	1342		13 days embryo heart cDNA, RIKEN full-length enriched library, clone:D330017K01 product:unclassifiable, full insert sequence	13 days embryo heart cDNA, RIKEN full-length enriched library, clone:D330017K01 product:unclassifiable, full insert sequence	A	P	A	A	A	P	P	P	P	P	P	A	P
1456752_at	174	168	123	53	62	314	229	123	90	207	260	118	85		13 days embryo heart cDNA, RIKEN full-length enriched library, clone:D330038P10 product:Mus musculus Nespas mRNA, full insert sequence	13 days embryo heart cDNA, RIKEN full-length enriched library, clone:D330038P10 product:Mus musculus Nespas mRNA, full insert sequence	P	P	P	A	A	P	A	P	P	P	P	A	A
1428106_at	1015	733	921	1359	1584	826	467	662	503	433	262	261	530		1300001I01Rik	RIKEN cDNA 1300001I01 gene	P	P	P	P	P	P	P	P	P	P	P	P	P
1460178_at	1949	1167	1766	1730	1700	1319	1494	1597	1152	1194	1015	1253	898		1300002A08Rik	RIKEN cDNA 1300002A08 gene	P	P	P	P	P	P	P	P	P	P	P	P	P
1429690_at	622	640	466	406	381	1354	1271	785	593	1153	793	689	782		1300003B13Rik	RIKEN cDNA 1300003B13 gene	P	P	P	P	P	P	P	P	P	P	P	P	P
1417199_at	710	1585	1039	714	834	2858	2512	1674	1463	1196	1064	877	1492		1300007B12Rik	RIKEN cDNA 1300007B12 gene	P	P	P	P	P	P	P	P	P	P	P	P	P
1417200_at	1238	1258	1303	933	853	1187	1377	1223	1045	1467	1011	698	767		1300007B12Rik	RIKEN cDNA 1300007B12 gene	P	P	P	P	P	P	P	P	P	P	P	P	P
1431213_a_at	481	343	257	63	66	48	49	61	107	774	74	14	99		1300007C21Rik /// LOC433762 /// LOC668462 /// LOC668581 /// LOC670993 /// LOC673100	RIKEN cDNA 1300007C21 gene /// similar to Retrovirus-related POL polyprotein (Endonuclease) /// similar to RIKEN cDNA 1300007C21 gene /// similar to NADH-ubiquinone oxidoreductase MWFE subunit (Complex I-MWFE) (CI-MWFE) /// hypothetical protein LOC670993 /// hypothetical protein LOC673100	P	P	P	P	A	P	P	P	P	P	P	A	P
1424904_at	314	327	331	244	322	106	149	118	173	201	203	195	106		1300010F03Rik	RIKEN cDNA 1300010F03 gene	P	P	P	P	P	P	P	P	P	P	P	P	A
1455376_at	801	662	863	958	841	339	377	341	480	807	594	723	364		1300010F03Rik	RIKEN cDNA 1300010F03 gene	P	P	P	P	P	P	P	P	P	P	P	P	P
1424159_at	541	223	457	508	421	828	550	711	732	727	713	1099	383		1300010M03Rik	RIKEN cDNA 1300010M03 gene	P	P	P	P	P	P	P	P	P	P	P	P	P
1431251_at	53	9	32	21	12	465	567	398	291	75	31	28	172		1300011L04Rik	RIKEN cDNA 1300011L04 gene	A	A	A	A	A	P	P	P	P	A	A	A	A
1423425_at	1136	311	609	711	582	209	362	414	472	310	255	339	239		1300012G16Rik	RIKEN cDNA 1300012G16 gene	P	P	P	P	P	P	P	P	P	P	P	P	P
1423426_at	543	235	333	437	329	380	334	791	474	207	158	93	248		1300012G16Rik	RIKEN cDNA 1300012G16 gene	P	P	P	P	A	P	P	P	P	A	A	A	A
1428851_at	2459	971	444	257	232	260	334	184	697	3594	2726	289	258		1300014I06Rik	RIKEN cDNA 1300014I06 gene	P	P	P	A	A	P	P	P	P	P	P	P	A
1423681_at	861	460	911	807	613	574	670	886	989	939	805	558	380		1300018I05Rik	RIKEN cDNA 1300018I05 gene	P	P	P	P	P	P	P	P	P	P	P	P	P
1451082_at	611	347	618	568	451	421	607	685	780	867	738	540	331		1300018I05Rik	RIKEN cDNA 1300018I05 gene	P	P	P	P	A	P	P	P	P	P	P	P	A
1426828_at	352	528	762	770	709	1059	1276	1483	927	1406	842	641	799		1300018I17Rik	RIKEN cDNA 1300018I17 gene	P	P	P	P	P	P	P	P	P	P	P	P	P
1428894_at	449	531	600	434	508	144	407	400	386	535	717	787	221		1300018J18Rik	RIKEN cDNA 1300018J18 gene	P	P	P	P	P	P	P	P	P	P	P	P	P
1455145_at	389	1221	984	677	786	4481	3301	2827	2518	1222	1146	706	2366		14, 17 days embryo head cDNA, RIKEN full-length enriched library, clone:3222402J19 product:unclassifiable, full insert sequence	14, 17 days embryo head cDNA, RIKEN full-length enriched library, clone:3222402J19 product:unclassifiable, full insert sequence	P	P	P	P	P	P	P	P	P	P	P	P	P
1446090_at	285	297	142	282	359	98	59	182	200	148	256	320	221		15 days embryo head cDNA, RIKEN full-length enriched library, clone:D930002E06 product:hypothetical protein, full insert sequence	15 days embryo head cDNA, RIKEN full-length enriched library, clone:D930002E06 product:hypothetical protein, full insert sequence	P	P	P	P	P	P	P	P	P	P	P	P	P
1436449_at	44	597	798	510	434	3263	1647	1328	917	6827	2598	1334	1566		15 days embryo head cDNA, RIKEN full-length enriched library, clone:D930025C07 product:unclassifiable, full insert sequence	15 days embryo head cDNA, RIKEN full-length enriched library, clone:D930025C07 product:unclassifiable, full insert sequence	A	P	P	P	P	P	P	P	P	P	P	P	P
1438889_at	8	450	496	501	376	1605	872	530	469	4549	2226	740	949		15 days embryo head cDNA, RIKEN full-length enriched library, clone:D930025C07 product:unclassifiable, full insert sequence	15 days embryo head cDNA, RIKEN full-length enriched library, clone:D930025C07 product:unclassifiable, full insert sequence	A	P	P	P	P	P	P	P	P	P	P	P	P
1446540_at	48	268	110	59	327	97	70	116	56	132	120	145	81		15 days embryo head cDNA, RIKEN full-length enriched library, clone:D930047B11 product:unclassifiable, full insert sequence	15 days embryo head cDNA, RIKEN full-length enriched library, clone:D930047B11 product:unclassifiable, full insert sequence	A	P	P	P	P	A	A	P	A	A	A	P	P
1435062_at	29	41	31	24	40	314	140	257	203	21	18	19	239		1500001A10Rik	RIKEN cDNA 1500001A10 gene	A	A	A	A	A	P	P	P	P	A	A	A	P
1421348_a_at	131	35	42	85	120	136	389	776	666	75	58	88	360		1500001H12Rik	RIKEN cDNA 1500001H12 gene	P	A	A	P	P	P	P	P	P	A	A	A	P
1421349_x_at	224	14	93	155	278	253	614	1361	1091	100	132	174	637		1500001H12Rik	RIKEN cDNA 1500001H12 gene	P	A	P	P	P	P	P	P	P	P	P	P	P
1424100_s_at	550	59	177	536	666	857	2080	3025	2588	414	399	434	1786		1500001H12Rik	RIKEN cDNA 1500001H12 gene	P	A	P	P	P	P	P	P	P	P	P	P	P
1451235_at	970	165	336	1061	1155	1324	2490	4651	3982	742	761	1081	2591		1500001H12Rik	RIKEN cDNA 1500001H12 gene	P	P	P	P	P	P	P	P	P	P	P	P	P
1428226_at	599	1010	952	948	979	275	628	370	633	1126	1093	1096	593		1500001L15Rik	RIKEN cDNA 1500001L15 gene	P	P	P	P	P	P	P	P	P	P	P	P	P
1438318_x_at	2760	3535	3611	3337	2593	2447	2121	1559	1453	5535	5456	6275	1458		1500001L15Rik	RIKEN cDNA 1500001L15 gene	P	P	P	P	P	P	P	P	P	P	P	P	P
1428684_at	334	439	484	240	225	340	613	419	508	537	320	335	322		1500001M20Rik	RIKEN cDNA 1500001M20 gene	P	P	P	P	P	P	P	P	P	P	P	P	P
1460435_at	358	432	660	649	560	425	741	699	514	631	512	582	377		1500002O20Rik	RIKEN cDNA 1500002O20 gene	P	P	P	P	P	A	A	P	P	P	A	P	A
1420809_a_at	3261	1475	1506	1350	1619	1776	1160	4522	2328	904	1369	1917	2493		1500003O03Rik	RIKEN cDNA 1500003O03 gene	P	P	P	P	P	P	P	P	P	P	P	P	P
1420810_at	2593	711	912	1130	1219	754	624	1503	1563	872	883	1291	1028		1500003O03Rik	RIKEN cDNA 1500003O03 gene	P	P	P	P	P	P	P	P	P	P	P	P	P
1416559_at	1861	551	949	1936	2520	713	514	572	590	949	981	562	467		1500003O22Rik	RIKEN cDNA 1500003O22 gene	P	P	P	P	P	P	P	P	P	P	P	P	P
1428332_at	2189	1110	2406	4543	3049	970	881	921	1364	2622	1115	2075	1025		1500004A08Rik	RIKEN cDNA 1500004A08 gene	P	P	P	P	P	P	P	P	P	P	P	P	P
1439087_a_at	307	423	560	684	543	153	176	214	292	412	256	311	162		1500004A08Rik	RIKEN cDNA 1500004A08 gene	P	P	P	P	P	A	A	P	P	P	A	A	A
1418474_at	809	194	560	854	628	795	1273	1259	1044	168	173	292	814		1500005A01Rik	RIKEN cDNA 1500005A01 gene	P	P	P	P	P	P	P	P	P	P	P	P	P
1428303_at	47	576	1670	2230	2747	50	72	73	33	105	88	105	165		1500005I02Rik	RIKEN cDNA 1500005I02 gene	A	P	P	P	P	A	A	A	A	A	A	A	P
1429764_at	383	17	86	116	116	440	897	265	1765	136	49	24	313		1500005K14Rik	RIKEN cDNA 1500005K14 gene	P	A	A	A	A	P	P	P	P	P	A	A	P
1456603_at	681	66	149	121	142	1151	1085	628	2483	199	133	110	755		1500005K14Rik	RIKEN cDNA 1500005K14 gene	P	A	P	A	A	P	P	P	P	P	A	A	P
1430543_at	433	347	455	552	427	412	499	677	507	1041	1214	1497	314		1500005P14Rik	RIKEN cDNA 1500005P14 gene	P	P	P	P	P	P	P	P	P	P	P	P	P
1435256_at	3490	1282	2442	4347	3858	6157	5641	6925	5466	3983	6805	7637	3194		1500005P14Rik	RIKEN cDNA 1500005P14 gene	P	P	P	P	P	P	P	P	P	P	P	P	P
1455390_at	594	618	875	750	570	508	1224	1234	1175	1272	1008	860	999		1500005P14Rik /// Alkbh6	RIKEN cDNA 1500005P14 gene /// alkB, alkylation repair homolog 6 (E. coli)	P	P	P	P	P	P	P	P	P	P	P	P	P
1452827_at	130	134	518	437	433	82	212	195	206	131	109	67	165		1500009C09Rik	RIKEN cDNA 1500009C09 gene	P	A	P	P	P	P	P	P	P	P	P	A	P
1452840_at	852	560	474	92	6	717	978	629	424	307	153	35	359		1500009L16Rik	RIKEN cDNA 1500009L16 gene	P	P	P	P	A	P	P	P	P	P	P	A	P
1428441_at	710	1627	1197	914	887	808	780	1390	1041	974	1092	1337	1507		1500009M05Rik	RIKEN cDNA 1500009M05 gene	P	P	P	P	P	P	P	P	P	P	P	P	P
1429680_at	55	67	142	133	121	77	58	8	70	291	155	133	5		1500010G04Rik	RIKEN cDNA 1500010G04 gene	A	A	A	A	A	A	A	A	A	P	A	A	A
1442886_at	97	782	338	366	377	253	163	143	145	399	299	148	43		1500010G04Rik	RIKEN cDNA 1500010G04 gene	P	P	P	P	P	P	P	P	P	P	P	P	A
1423655_a_at	516	553	578	445	268	633	1027	823	521	1116	369	319	272		1500010J02Rik	RIKEN cDNA 1500010J02 gene	P	P	P	P	P	P	P	P	P	P	P	P	P
1423656_x_at	458	563	681	264	247	667	1128	555	597	1137	382	271	322		1500010J02Rik	RIKEN cDNA 1500010J02 gene	P	P	P	P	P	P	P	P	P	P	P	P	P
1428370_at	164	151	148	171	222	241	216	331	298	749	790	1348	270		1500011B03Rik	RIKEN cDNA 1500011B03 gene	A	A	P	P	A	P	P	P	P	A	P	P	P
1456857_at	490	479	609	357	449	526	885	909	677	397	274	358	454		1500011B03Rik	RIKEN cDNA 1500011B03 gene	P	P	P	P	P	P	P	P	P	P	P	P	P
1424192_at	1634	677	983	844	769	856	1808	1624	1504	1289	677	571	1411		1500011H22Rik	RIKEN cDNA 1500011H22 gene	P	P	P	P	P	P	P	P	P	P	P	P	P
1442083_at	99	624	161	181	229	463	129	159	175	335	257	222	97		1500011J06Rik	RIKEN cDNA 1500011J06 gene	P	P	P	P	P	P	P	P	P	P	P	P	P
1451640_a_at	273	399	546	469	567	629	396	325	441	598	578	580	589		1500011J06Rik	RIKEN cDNA 1500011J06 gene	P	P	P	P	P	P	P	P	P	P	P	P	P
1454074_a_at	1744	3013	2927	2327	2989	1857	2141	2476	2149	3365	2964	2701	2534		1500011J06Rik	RIKEN cDNA 1500011J06 gene	P	P	P	P	P	P	P	P	P	P	P	P	P
1438678_at	951	587	917	1083	1035	407	632	774	666	792	679	622	800		1500011K16Rik	RIKEN cDNA 1500011K16 gene	P	P	P	P	P	P	P	P	P	P	P	P	P
1455010_at	378	285	481	429	381	255	762	503	514	552	586	666	412		1500012F01Rik	RIKEN cDNA 1500012F01 gene	P	P	P	P	P	P	P	P	P	P	P	P	P
1423261_at	8866	298	654	249	57	79	187	1286	963	50	18	18	433		1500015O10Rik	RIKEN cDNA 1500015O10 gene	P	P	P	P	A	A	P	P	P	A	A	A	P
1460049_s_at	15544	632	1064	377	33	55	243	1884	1681	24	7	21	800		1500015O10Rik	RIKEN cDNA 1500015O10 gene	P	P	P	P	A	P	P	P	P	A	A	A	P
1438641_x_at	74	257	124	71	70	2642	2782	3464	2326	1539	468	93	1819		1500016O10Rik	RIKEN cDNA 1500016O10 gene	P	P	P	P	A	P	P	P	P	P	P	P	P
1452806_at	12	10	39	17	18	501	737	503	410	510	71	29	273		1500016O10Rik	RIKEN cDNA 1500016O10 gene	A	A	A	A	A	P	P	P	P	P	A	A	P
1452807_s_at	40	106	77	29	53	920	1698	778	882	1026	97	30	543		1500016O10Rik	RIKEN cDNA 1500016O10 gene	A	P	P	A	A	P	P	P	P	P	P	A	P
1416894_at	1026	539	837	536	423	1079	1733	1859	1489	768	759	640	1162		1500019G21Rik	RIKEN cDNA 1500019G21 gene	P	P	P	P	P	P	P	P	P	P	P	P	P
1450961_a_at	979	241	453	261	192	609	1604	2181	1917	1306	561	216	2045		1500026B10Rik /// Tceal5 /// Tceal3	RIKEN cDNA 1500026B10 gene /// transcription elongation factor A (SII)-like 5 /// transcription elongation factor A (SII)-like 3	P	P	P	P	A	P	P	P	P	P	P	P	P
1417427_at	758	895	767	436	370	331	524	673	626	870	889	1016	816		1500026D16Rik	RIKEN cDNA 1500026D16 gene	P	P	P	P	P	P	P	P	P	P	P	P	P
1435733_x_at	853	822	970	274	276	327	884	833	781	462	1213	1539	913		1500026D16Rik	RIKEN cDNA 1500026D16 gene	P	P	P	P	P	P	P	P	P	P	P	P	P
1439453_x_at	1450	1183	1284	732	712	572	1161	1322	1500	1222	2246	2686	1572		1500026D16Rik	RIKEN cDNA 1500026D16 gene	P	P	P	P	P	P	P	P	P	P	P	P	P
1424871_s_at	240	348	303	303	119	423	435	842	597	377	200	236	321		1500031H01Rik	RIKEN cDNA 1500031H01 gene	P	P	P	P	A	P	P	P	P	P	P	P	P
1417840_at	1598	1349	1879	1905	1463	2051	3462	3695	3171	1586	1022	985	3693		1500031L02Rik	RIKEN cDNA 1500031L02 gene	P	P	P	P	P	P	P	P	P	P	P	P	P
1426290_at	226	320	229	170	225	381	345	357	270	335	260	219	348		1500031M22Rik	RIKEN cDNA 1500031M22 gene	P	P	P	P	P	P	P	P	P	P	P	P	P
1424628_a_at	6804	4055	5535	7043	6289	5014	6670	7438	6066	4272	6340	7218	6558		1500032D16Rik	RIKEN cDNA 1500032D16 gene	P	P	P	P	P	P	P	P	P	P	P	P	P
1426133_a_at	396	302	219	185	220	106	106	172	187	257	169	165	165		1500032H18Rik	RIKEN cDNA 1500032H18 gene	P	P	P	A	P	P	A	P	P	P	A	A	A
1452584_at	4529	3449	5941	6206	4843	1687	4280	3736	3610	4292	5460	6846	2728		1500032L24Rik	RIKEN cDNA 1500032L24 gene	P	P	P	P	P	P	P	P	P	P	P	P	P
1447537_at	172	654	389	445	413	353	196	395	305	763	630	296	117		1500032P08Rik	RIKEN cDNA 1500032P08 gene	P	P	P	P	P	P	P	P	P	P	P	P	P
1429038_at	600	335	390	393	402	1046	1657	1391	857	317	720	701	609		1500034J01Rik	RIKEN cDNA 1500034J01 gene	P	P	P	P	P	P	P	P	P	P	P	P	P
1429039_s_at	1530	952	1121	1232	1029	1236	2232	1157	957	1529	1940	2331	569		1500034J01Rik	RIKEN cDNA 1500034J01 gene	P	P	P	P	P	P	P	P	P	P	P	P	P
1434281_at	3164	2382	2383	2341	2224	3935	3918	2341	2062	2329	3651	4496	1986		1500034J01Rik	RIKEN cDNA 1500034J01 gene	P	P	P	P	P	P	P	P	P	P	P	P	P
1417474_at	1783	926	1047	996	843	1388	1748	1917	1437	1276	2013	2759	1550		1500035H01Rik	RIKEN cDNA 1500035H01 gene	P	P	P	P	P	P	P	P	P	P	P	P	P
1430070_at	68	138	72	79	198	286	411	246	160	71	44	120	240		1500035N22Rik	RIKEN cDNA 1500035N22 gene	A	A	A	A	A	P	A	P	P	A	A	A	A
1430302_at	69	337	168	133	116	306	239	231	177	367	219	98	94		1500041B16Rik	RIKEN cDNA 1500041B16 gene	P	P	P	P	A	P	P	P	P	P	P	P	A
1433695_at	1505	1250	1826	2035	1694	10990	10912	9101	7519	2967	1496	658	6074		1500041B16Rik	RIKEN cDNA 1500041B16 gene	P	P	P	P	P	P	P	P	P	P	P	P	P
1428487_s_at	1052	1186	859	692	880	585	422	662	738	240	157	240	710		1500041J02Rik	RIKEN cDNA 1500041J02 gene	P	P	P	P	P	P	P	P	P	P	P	P	P
1460510_a_at	1342	2018	847	809	915	519	481	884	1039	380	277	373	765		1500041J02Rik	RIKEN cDNA 1500041J02 gene	P	P	P	P	P	P	P	P	P	P	P	P	P
1418732_s_at	327	323	422	376	402	418	370	411	436	478	506	769	405		1500041N16Rik	RIKEN cDNA 1500041N16 gene	P	A	P	P	P	P	P	P	P	P	P	P	P
1440361_at	22	31	7	37	20	298	341	337	215	26	24	31	263		16 days embryo head cDNA, RIKEN full-length enriched library, clone:C130014E09 product:unclassifiable, full insert sequence	16 days embryo head cDNA, RIKEN full-length enriched library, clone:C130014E09 product:unclassifiable, full insert sequence	A	A	A	A	A	P	P	P	P	A	A	A	P
1460595_at	282	214	119	190	368	1038	667	393	323	688	290	147	636		16 days embryo head cDNA, RIKEN full-length enriched library, clone:C130021L12 product:unclassifiable, full insert sequence	16 days embryo head cDNA, RIKEN full-length enriched library, clone:C130021L12 product:unclassifiable, full insert sequence	P	P	P	P	P	P	P	P	P	P	P	P	P
1439887_at	277	224	70	26	21	1593	1264	1068	890	473	125	75	762		16 days embryo head cDNA, RIKEN full-length enriched library, clone:C130025B04 product:unclassifiable, full insert sequence	16 days embryo head cDNA, RIKEN full-length enriched library, clone:C130025B04 product:unclassifiable, full insert sequence	P	P	P	A	A	P	P	P	P	P	P	A	P
1441124_at	62	140	64	82	85	332	209	150	100	120	121	150	113		16 days embryo head cDNA, RIKEN full-length enriched library, clone:C130032O22 product:unclassifiable, full insert sequence	16 days embryo head cDNA, RIKEN full-length enriched library, clone:C130032O22 product:unclassifiable, full insert sequence	A	P	A	P	A	P	P	P	P	P	P	P	P
1446150_at	131	502	93	184	167	77	44	96	39	59	44	31	96		16 days embryo head cDNA, RIKEN full-length enriched library, clone:C130070I23 product:unclassifiable, full insert sequence	16 days embryo head cDNA, RIKEN full-length enriched library, clone:C130070I23 product:unclassifiable, full insert sequence	P	P	P	P	P	P	P	P	A	A	A	A	P
1436359_at	18	4	5	8	10	182	204	200	315	49	8	7	132		16 days neonate cerebellum cDNA, RIKEN full-length enriched library, clone:9630013F18 product:unclassifiable, full insert sequence	16 days neonate cerebellum cDNA, RIKEN full-length enriched library, clone:9630013F18 product:unclassifiable, full insert sequence	A	A	A	A	A	P	P	P	P	A	A	A	P
1446286_at	25	452	81	233	257	45	35	45	36	117	225	132	32		16 days neonate cerebellum cDNA, RIKEN full-length enriched library, clone:9630014E16 product:unclassifiable, full insert sequence	16 days neonate cerebellum cDNA, RIKEN full-length enriched library, clone:9630014E16 product:unclassifiable, full insert sequence	A	P	P	P	P	A	A	A	A	A	P	P	A
1439732_at	5	65	30	21	4	1319	996	1550	961	109	13	10	942		16 days neonate cerebellum cDNA, RIKEN full-length enriched library, clone:9630041I08 product:unclassifiable, full insert sequence	16 days neonate cerebellum cDNA, RIKEN full-length enriched library, clone:9630041I08 product:unclassifiable, full insert sequence	A	P	A	A	A	P	P	P	P	P	A	A	P
1456759_at	43	341	198	165	171	703	1101	1134	1011	597	552	339	1364		16 days neonate cerebellum cDNA, RIKEN full-length enriched library, clone:9630048A22 product:unclassifiable, full insert sequence	16 days neonate cerebellum cDNA, RIKEN full-length enriched library, clone:9630048A22 product:unclassifiable, full insert sequence	A	P	P	P	A	P	P	P	P	P	P	P	P
1446154_at	58	161	106	118	135	78	62	128	86	111	203	307	83		16 days neonate cerebellum cDNA, RIKEN full-length enriched library, clone:9630050E20 product:unclassifiable, full insert sequence	16 days neonate cerebellum cDNA, RIKEN full-length enriched library, clone:9630050E20 product:unclassifiable, full insert sequence	A	P	P	P	A	A	A	A	P	A	P	P	A
1439779_at	642	276	215	245	177	3660	2286	3276	2582	677	182	22	3129		16 days neonate cerebellum cDNA, RIKEN full-length enriched library, clone:9630050J22 product:unclassifiable, full insert sequence	16 days neonate cerebellum cDNA, RIKEN full-length enriched library, clone:9630050J22 product:unclassifiable, full insert sequence	P	P	P	P	P	P	P	P	P	P	P	A	P
1446846_at	121	219	135	148	176	40	52	93	103	118	194	334	91		16 days neonate thymus cDNA, RIKEN full-length enriched library, clone:A130082C12 product:unclassifiable, full insert sequence	16 days neonate thymus cDNA, RIKEN full-length enriched library, clone:A130082C12 product:unclassifiable, full insert sequence	P	P	P	P	P	A	A	A	P	A	P	P	A
1458425_at	107	82	73	92	103	366	352	405	284	130	105	143	334		16 days neonate thymus cDNA, RIKEN full-length enriched library, clone:A130088J11 product:unclassifiable, full insert sequence	16 days neonate thymus cDNA, RIKEN full-length enriched library, clone:A130088J11 product:unclassifiable, full insert sequence	A	A	P	A	A	P	P	P	P	P	P	P	P
1429091_at	98	57	100	146	63	92	64	106	74	231	186	136	87		1600002K03Rik	RIKEN cDNA 1600002K03 gene	A	A	A	A	A	A	A	A	A	P	P	A	A
1430062_at	66	101	294	429	325	111	95	179	116	152	78	55	58		1600002O04Rik	RIKEN cDNA 1600002O04 gene	A	A	P	P	P	P	P	A	A	P	A	A	A
1419660_at	1101	937	1062	1027	1204	686	747	748	671	1137	1082	908	1256		1600012F09Rik	RIKEN cDNA 1600012F09 gene	P	P	P	P	P	P	P	P	P	P	P	P	P
1449557_at	368	314	405	349	440	179	374	241	214	383	481	545	219		1600012F09Rik /// LOC624446	RIKEN cDNA 1600012F09 gene /// hypothetical LOC624446	P	P	P	P	P	P	P	P	P	P	P	P	P
1428217_at	696	689	1064	790	828	360	558	484	481	685	652	1623	503		1600012H06Rik	RIKEN cDNA 1600012H06 gene	P	P	P	P	P	P	P	P	P	P	P	P	P
1428218_a_at	1106	1011	973	858	1107	442	408	576	520	746	680	1448	626		1600012H06Rik	RIKEN cDNA 1600012H06 gene	P	P	P	P	P	P	P	P	P	P	P	P	P
1424444_a_at	1271	215	659	646	641	350	364	689	623	621	790	624	370		1600014C10Rik	RIKEN cDNA 1600014C10 gene	P	P	P	P	P	P	P	P	P	P	P	P	P
1434715_at	94	67	58	68	87	553	448	661	412	53	178	202	392		1600014C10Rik	RIKEN cDNA 1600014C10 gene	P	A	P	P	P	P	P	P	P	A	P	P	P
1436424_at	401	1558	1107	1016	738	1203	1035	672	571	1142	860	585	542		1600020E01Rik	RIKEN cDNA 1600020E01 gene	P	P	P	P	P	P	P	P	P	P	P	P	P
1439014_at	597	817	772	413	311	2648	1894	1331	1256	3489	2213	665	1134		1600021P15Rik	RIKEN cDNA 1600021P15 gene	P	P	P	P	P	P	P	P	P	P	P	P	P
1428366_at	255	366	564	426	304	275	482	326	275	602	526	228	174		1600027N09Rik	RIKEN cDNA 1600027N09 gene	A	A	P	P	A	A	A	P	P	P	P	P	A
1435547_at	2001	1313	789	886	1091	3824	4395	6932	6282	910	530	554	7726		17 days embryo heart cDNA, RIKEN full-length enriched library, clone:I920018H16 product:hypothetical protein, full insert sequence	17 days embryo heart cDNA, RIKEN full-length enriched library, clone:I920018H16 product:hypothetical protein, full insert sequence	P	P	P	P	P	P	P	P	P	P	P	P	P
1453643_at	14	14	21	13	17	129	552	347	394	7	15	6	185		1700001L19Rik	RIKEN cDNA 1700001L19 gene	A	A	A	A	A	P	P	P	P	A	A	A	P
1451341_s_at	327	225	384	686	762	556	287	330	309	362	1226	2301	249		1700003N22Rik /// AI840826	RIKEN cDNA 1700003N22 gene /// expressed sequence AI840826	P	P	P	P	P	P	P	P	P	P	P	P	P
1428732_at	188	229	327	284	165	82	124	141	140	286	233	227	98		1700008J07Rik	RIKEN cDNA 1700008J07 gene	P	P	P	P	P	P	P	P	P	P	P	P	P
1426419_at	313	1453	822	459	633	745	440	788	480	728	836	408	715		1700009P03Rik	RIKEN cDNA 1700009P03 gene	P	P	P	P	P	P	P	P	P	P	P	P	P
1426421_s_at	234	444	354	337	400	349	243	300	189	475	415	278	293		1700009P03Rik	RIKEN cDNA 1700009P03 gene	P	P	P	P	P	P	P	P	P	P	P	P	P
1426803_at	203	1540	589	423	472	1087	561	458	416	1230	791	440	582		1700009P03Rik	RIKEN cDNA 1700009P03 gene	P	P	P	P	P	P	P	P	P	P	P	P	P
1442038_at	151	215	174	163	192	207	111	160	174	217	245	185	169		1700009P03Rik	RIKEN cDNA 1700009P03 gene	P	P	P	P	P	P	P	P	P	P	P	P	P
1429181_at	663	264	237	207	156	30	53	134	124	34	97	131	182		1700009P17Rik	RIKEN cDNA 1700009P17 gene	P	P	P	P	A	A	A	A	A	A	A	A	A
1455630_at	1816	839	977	883	846	3363	2718	3260	2480	757	539	872	4150		1700010H15Rik	RIKEN cDNA 1700010H15 gene	P	P	P	P	P	P	P	P	P	P	P	P	P
1443621_at	539	148	325	476	129	66	110	108	303	44	41	79	83		1700010H23Rik	RIKEN cDNA 1700010H23 gene	P	P	P	P	A	P	P	P	P	A	A	A	P
1429324_at	28	64	25	29	22	226	119	68	75	100	243	341	48		1700012A16Rik	RIKEN cDNA 1700012A16 gene	A	A	A	A	A	P	P	P	P	A	P	P	A
1431818_at	1517	2686	966	1658	2246	5112	1508	1328	1174	1907	2326	1860	1457		1700012B15Rik	RIKEN cDNA 1700012B15 gene	P	P	P	P	P	P	P	P	P	P	P	P	P
1453294_at	37	63	98	64	35	153	226	394	283	159	71	32	223		1700012B15Rik	RIKEN cDNA 1700012B15 gene	A	A	P	A	A	A	P	P	P	A	A	A	P
1428788_at	1230	1158	2705	3259	3288	2095	2154	2195	1805	4733	3139	3670	1856		1700012G19Rik	RIKEN cDNA 1700012G19 gene	P	P	P	P	P	P	P	P	P	P	P	P	P
1452919_a_at	1793	1647	3408	5356	4548	1295	3324	3598	3242	5615	5511	7072	2789		1700012G19Rik	RIKEN cDNA 1700012G19 gene	P	P	P	P	P	P	P	P	P	P	P	P	P
1437150_at	70	260	323	174	264	415	1083	605	522	533	110	6	362		1700012H17Rik	RIKEN cDNA 1700012H17 gene	P	P	P	P	P	P	P	P	P	P	P	A	P
1440359_at	48	105	143	144	175	743	858	511	413	390	95	14	344		1700012H17Rik	RIKEN cDNA 1700012H17 gene	A	P	P	P	P	P	P	P	P	P	A	A	P
1452972_at	166	342	247	345	366	3	58	28	139	205	185	91	214		1700013G20Rik	RIKEN cDNA 1700013G20 gene	P	P	P	P	P	A	A	A	P	P	P	A	P
1429758_at	496	207	217	236	462	59	82	114	122	262	99	58	113		1700017B05Rik /// LOC640563	RIKEN cDNA 1700017B05 gene /// hypothetical protein LOC640563	P	P	P	P	P	P	P	P	P	P	A	A	A
1430368_s_at	47	80	99	221	241	94	230	487	375	437	166	150	407		1700019D03Rik	RIKEN cDNA 1700019D03 gene	A	P	P	P	P	P	P	P	P	P	P	P	P
1432494_a_at	1612	782	932	569	482	202	446	279	514	535	1060	1432	592		1700019E19Rik	RIKEN cDNA 1700019E19 gene	P	P	P	P	P	P	P	P	P	P	P	P	P
1436669_at	235	344	1033	1696	1322	147	72	36	89	102	73	97	246		1700019G17Rik	RIKEN cDNA 1700019G17 gene	P	P	P	P	P	P	P	P	P	P	P	P	P
1436670_x_at	282	433	1111	1994	1530	194	110	102	118	179	118	189	177		1700019G17Rik	RIKEN cDNA 1700019G17 gene	P	P	P	P	P	P	P	P	A	P	A	P	P
1424223_at	213	208	341	1110	1477	1440	1236	4210	3278	365	202	89	4130		1700020C11Rik	RIKEN cDNA 1700020C11 gene	A	P	P	P	P	P	P	P	P	P	P	A	P
1428411_at	1267	2663	2412	4507	3429	9560	10844	8872	8514	4873	3446	2840	12612		1700020I14Rik	RIKEN cDNA 1700020I14 gene	P	P	P	P	P	P	P	P	P	P	P	P	P
1430989_a_at	471	272	368	331	489	285	179	162	239	141	181	230	177		1700020I14Rik	RIKEN cDNA 1700020I14 gene	P	P	P	P	P	P	P	P	P	P	P	P	P
1437774_at	173	363	290	464	339	1315	922	507	772	372	374	376	1917		1700020I14Rik	RIKEN cDNA 1700020I14 gene	P	P	P	P	P	P	P	P	P	P	P	P	P
1436052_at	280	336	273	346	284	829	758	727	552	407	504	719	614		1700020O03Rik	RIKEN cDNA 1700020O03 gene	P	P	P	P	P	P	P	P	P	P	P	P	P
1421019_at	1835	1561	2392	2493	2128	2225	3266	2463	2303	1467	1080	1180	2414		1700021F05Rik	RIKEN cDNA 1700021F05 gene	P	P	P	P	P	P	P	P	P	P	P	P	P
1431080_at	10	34	3	4	16	221	215	208	159	5	22	14	189		1700021K10Rik	RIKEN cDNA 1700021K10 gene	A	A	A	A	A	P	P	P	P	A	A	A	P
1428243_at	657	178	293	375	220	447	457	498	467	585	934	1140	451		1700021K19Rik	RIKEN cDNA 1700021K19 gene	P	A	P	P	A	P	P	P	P	P	P	P	P
1437710_x_at	353	258	284	329	415	88	213	342	200	224	221	168	262		1700021P22Rik	RIKEN cDNA 1700021P22 gene	P	P	P	P	P	P	P	P	P	P	P	A	P
1429095_at	420	232	186	80	50	66	147	140	82	344	56	16	74		1700022C02Rik	RIKEN cDNA 1700022C02 gene	P	P	P	P	A	P	P	P	P	P	A	A	P
1417139_at	434	551	417	428	492	143	169	167	153	294	241	185	212		1700022L09Rik	RIKEN cDNA 1700022L09 gene	P	P	P	P	P	P	P	P	P	P	P	P	P
1423375_at	254	300	250	180	222	205	295	403	301	267	319	434	272		1700023B02Rik	RIKEN cDNA 1700023B02 gene	P	P	P	P	P	P	P	P	P	P	P	P	P
1428581_at	77	120	76	60	113	124	90	92	64	44	123	410	181		1700024G10Rik	RIKEN cDNA 1700024G10 gene	A	A	A	A	A	A	A	P	A	A	P	P	P
1436431_at	943	1284	1101	684	449	420	507	1061	796	3502	1514	611	834		1700025G04Rik	RIKEN cDNA 1700025G04 gene	P	P	P	P	P	P	P	P	P	P	P	P	P
1444235_at	262	615	665	499	406	281	472	608	544	1954	608	169	918		1700025G04Rik	RIKEN cDNA 1700025G04 gene	P	P	P	P	P	P	P	P	P	P	P	A	P
1455732_at	533	672	730	391	307	964	896	1039	805	2524	1314	565	1220		1700025G04Rik	RIKEN cDNA 1700025G04 gene	P	P	P	P	P	P	P	P	P	P	P	P	P
1460553_at	518	243	526	541	517	274	363	524	323	361	309	312	376		1700025K23Rik	RIKEN cDNA 1700025K23 gene	P	A	P	P	P	P	P	P	P	P	P	P	P
1447993_a_at	834	519	515	487	561	1485	1377	1355	1168	1302	973	540	903		1700026B20Rik	RIKEN cDNA 1700026B20 gene	P	P	P	P	P	P	P	P	P	P	P	P	P
1447995_x_at	348	386	246	335	271	349	309	704	537	395	394	384	377		1700026B20Rik	RIKEN cDNA 1700026B20 gene	P	P	P	P	A	P	P	P	P	P	P	P	P
1438638_x_at	222	187	325	172	187	376	362	339	336	338	356	341	159		1700027J05Rik	RIKEN cDNA 1700027J05 gene	P	P	P	P	P	P	P	P	P	P	P	P	P
1452706_a_at	60	101	330	231	246	772	663	609	496	609	351	210	239		1700027J05Rik	RIKEN cDNA 1700027J05 gene	A	A	P	P	A	P	P	P	P	P	P	P	P
1429647_at	7	110	270	498	844	2	4	5	14	15	6	7	38		1700027L20Rik	RIKEN cDNA 1700027L20 gene	A	A	P	P	P	A	A	A	A	A	A	A	A
1424763_at	1135	617	1261	1250	467	1378	1690	785	772	1217	260	154	352		1700027N10Rik	RIKEN cDNA 1700027N10 gene	P	P	P	P	P	P	P	P	P	P	P	P	P
1428593_at	720	612	520	201	282	581	555	364	488	837	387	358	508		1700029F09Rik	RIKEN cDNA 1700029F09 gene	P	P	P	P	P	P	P	P	P	P	P	P	P
1424447_at	275	286	351	365	351	249	286	239	236	556	359	281	170		1700030K09Rik	RIKEN cDNA 1700030K09 gene	P	P	P	P	P	P	P	P	P	P	P	P	P
1452785_at	980	1153	1621	1744	1866	319	422	433	444	1560	1348	950	627		1700034H14Rik	RIKEN cDNA 1700034H14 gene	P	P	P	P	P	P	P	P	P	P	P	P	P
1432094_a_at	836	745	902	813	867	2004	1706	1787	1704	1268	1230	1337	2232		1700034M03Rik	RIKEN cDNA 1700034M03 gene	P	P	P	P	P	P	P	P	P	P	P	P	P
1430188_at	199	122	164	98	137	83	240	168	190	193	126	217	92		1700037C18Rik	RIKEN cDNA 1700037C18 gene	P	P	P	P	P	P	P	P	P	P	P	P	P
1419742_at	75	53	129	51	9	259	245	399	284	176	119	62	90		1700037H04Rik	RIKEN cDNA 1700037H04 gene	A	A	A	A	A	P	P	P	P	P	P	A	P
1460262_a_at	611	562	494	357	401	633	843	1325	1201	791	470	272	624		1700037H04Rik	RIKEN cDNA 1700037H04 gene	P	P	P	P	P	P	P	P	P	P	P	P	P
1429122_a_at	383	575	998	992	765	331	537	574	633	592	477	646	652		1700040I03Rik	RIKEN cDNA 1700040I03 gene	P	P	P	P	P	P	P	P	P	P	P	P	P
1430190_at	345	126	102	57	62	201	155	321	238	204	124	74	200		1700041C02Rik	RIKEN cDNA 1700041C02 gene	P	P	P	A	A	P	P	P	P	P	P	A	P
1456557_at	128	78	87	72	36	269	383	236	166	130	102	48	175		1700041C02Rik	RIKEN cDNA 1700041C02 gene	P	P	P	P	A	P	P	P	P	P	P	A	P
1449239_at	28	213	303	141	101	197	303	150	120	279	69	19	57		1700045I19Rik	RIKEN cDNA 1700045I19 gene	A	P	P	P	P	P	P	P	P	P	P	A	P
1460466_at	184	75	63	49	36	391	293	138	148	101	665	1563	126		1700047I17Rik /// LOC665155	RIKEN cDNA 1700047I17 gene /// similar to signal recognition particle 54	A	A	A	A	A	P	A	P	P	P	P	P	P
1438044_at	6	8	12	95	26	5	11	54	15	341	4196	7122	250		1700047M11Rik	RIKEN cDNA 1700047M11 gene	A	A	A	A	A	A	A	A	A	P	P	P	P
1454879_s_at	294	135	177	130	250	147	146	361	272	211	207	201	290		1700052N19Rik	RIKEN cDNA 1700052N19 gene	P	P	P	P	P	P	P	P	P	P	P	P	P
1424796_at	34	6	8	8	11	1030	746	1114	854	159	24	92	875		1700054N08Rik	RIKEN cDNA 1700054N08 gene	A	A	A	A	A	P	P	P	P	A	A	A	P
1451483_s_at	170	33	80	48	63	1780	1132	2134	1461	343	125	341	1519		1700054N08Rik	RIKEN cDNA 1700054N08 gene	P	A	P	A	A	P	P	P	P	P	A	P	P
1426768_at	265	940	565	439	680	147	473	474	370	629	323	539	491		1700060H10Rik	RIKEN cDNA 1700060H10 gene	P	P	P	P	P	A	P	P	P	P	P	P	P
1434846_at	1202	1849	1348	1879	1963	303	180	240	510	711	1017	539	483		1700065A05Rik	RIKEN cDNA 1700065A05 gene	P	P	P	P	P	P	P	P	P	P	P	P	P
1434675_at	463	423	414	362	387	1006	711	735	716	670	248	134	944		1700065O13Rik	RIKEN cDNA 1700065O13 gene	P	P	P	P	P	P	P	P	P	P	P	P	P
1436150_at	519	332	464	567	564	746	714	1301	881	429	534	1025	760		1700066J24Rik	RIKEN cDNA 1700066J24 gene	P	P	P	P	P	P	P	P	P	P	P	P	P
1431183_at	30	80	64	53	73	57	42	35	54	228	156	104	32		1700066M21Rik	RIKEN cDNA 1700066M21 gene	A	P	P	P	P	A	A	A	A	P	P	P	P
1439967_at	84	168	146	178	100	102	98	246	174	196	266	285	149		1700071A11Rik	RIKEN cDNA 1700071A11 gene	P	P	P	P	P	P	P	P	P	P	P	P	P
1430055_at	120	192	257	192	135	140	128	254	159	189	183	185	159		1700080G18Rik	RIKEN cDNA 1700080G18 gene	A	P	P	A	A	P	A	A	P	P	P	A	P
1444130_at	120	406	119	188	238	198	120	126	140	348	274	141	63		1700081L11Rik	RIKEN cDNA 1700081L11 gene	A	P	P	P	P	P	A	A	A	P	P	A	A
1452373_at	446	439	547	486	627	479	550	624	648	664	284	303	341		1700081L11Rik	RIKEN cDNA 1700081L11 gene	P	P	P	P	P	P	P	P	P	P	P	P	P
1455085_at	29	272	246	120	66	1217	1216	694	495	4147	1055	140	346		1700086L19Rik	RIKEN cDNA 1700086L19 gene	P	P	P	P	A	P	P	P	P	P	P	P	P
1422774_at	696	234	498	421	216	193	351	429	398	183	92	42	201		1700088E04Rik	RIKEN cDNA 1700088E04 gene	P	A	P	P	P	P	P	P	P	A	A	A	P
1429907_at	259	369	417	364	196	84	153	142	155	306	282	187	202		1700094D03Rik	RIKEN cDNA 1700094D03 gene	P	P	P	P	P	A	A	P	A	P	P	A	A
1455589_at	479	1282	608	840	970	641	326	451	548	888	614	278	605		1700100M05Rik	RIKEN cDNA 1700100M05 gene	P	P	P	P	P	P	P	P	P	P	P	P	P
1456045_at	142	129	180	193	252	399	414	462	344	265	170	233	332		1700106N22Rik	RIKEN cDNA 1700106N22 gene	P	P	P	P	P	P	P	P	P	P	P	P	P
1451508_at	672	301	316	384	445	590	459	316	418	153	176	393	330		1700108L22Rik	RIKEN cDNA 1700108L22 gene	P	P	P	P	P	P	P	P	P	P	P	P	P
1432073_at	670	210	176	159	192	120	83	209	152	319	61	79	194		1700113I22Rik	RIKEN cDNA 1700113I22 gene	P	P	P	A	A	P	P	P	P	P	A	A	P
1416917_at	1919	1473	2006	2444	2228	833	1518	1133	1208	1824	1866	2058	1237		1700123O20Rik	RIKEN cDNA 1700123O20 gene	P	P	P	P	P	P	P	P	P	P	P	P	P
1450735_at	1994	1166	1277	1413	1868	992	1276	1028	770	801	2162	2382	1372		1810003N24Rik	RIKEN cDNA 1810003N24 gene	P	P	P	P	P	P	P	P	P	P	P	P	P
1425242_at	216	291	157	260	323	248	200	425	237	277	242	297	246		1810006K21Rik	RIKEN cDNA 1810006K21 gene	P	P	P	P	P	P	P	A	P	P	P	P	P
1418007_at	346	1621	1145	757	1181	1206	516	495	441	1322	1447	879	405		1810007M14Rik	RIKEN cDNA 1810007M14 gene	P	P	P	P	P	P	P	P	P	P	P	P	P
1418008_at	182	699	436	180	242	864	412	264	229	836	423	307	186		1810007M14Rik	RIKEN cDNA 1810007M14 gene	P	P	P	P	P	P	P	P	P	P	P	P	P
1434223_at	552	223	694	895	599	500	722	762	569	348	209	144	494		1810007P19Rik	RIKEN cDNA 1810007P19 gene	P	P	P	P	P	P	P	P	P	P	P	P	P
1416909_at	612	437	689	925	715	504	536	593	452	1049	1245	1780	429		1810008A14Rik	RIKEN cDNA 1810008A14 gene	P	P	P	P	P	P	P	P	P	P	P	P	P
1417448_at	566	243	411	530	498	561	739	651	535	781	578	512	534		1810008A18Rik	RIKEN cDNA 1810008A18 gene	P	P	P	P	P	P	P	P	P	P	P	P	P
1441254_at	1072	377	335	308	383	84	67	62	113	65	54	35	114		1810008K04Rik	RIKEN cDNA 1810008K04 gene	P	P	P	P	P	A	A	A	A	A	A	A	A
1460424_at	3039	926	1839	1715	1424	1536	1909	2388	2224	1567	1634	1935	1572		1810008O21Rik	RIKEN cDNA 1810008O21 gene	P	P	P	P	P	P	P	P	P	P	P	P	P
1417886_at	2130	690	1019	926	760	495	570	519	819	952	1014	1072	553		1810009A15Rik	RIKEN cDNA 1810009A15 gene	P	P	P	P	P	P	P	P	P	P	P	P	P
1418004_a_at	13132	5643	9379	9494	9242	222	997	905	1230	13167	5381	574	1864		1810009M01Rik	RIKEN cDNA 1810009M01 gene	P	P	P	P	P	P	P	P	P	P	P	P	P
1429730_at	221	201	509	216	211	157	650	252	336	806	361	168	200		1810009N02Rik	RIKEN cDNA 1810009N02 gene	P	P	P	P	P	P	P	P	P	P	P	P	P
1451334_at	606	508	829	688	668	139	362	449	331	1045	523	371	457		1810009O10Rik	RIKEN cDNA 1810009O10 gene	P	P	P	P	P	P	P	P	P	P	P	P	P
1428809_at	182	272	519	418	229	54	86	137	70	902	170	53	109		1810010H24Rik /// LOC671668 /// LOC674875	RIKEN cDNA 1810010H24 gene /// hypothetical protein LOC671668 /// hypothetical protein LOC674875	P	P	P	P	P	A	P	P	A	P	P	A	P
1432209_at	6	13	76	319	160	6	10	38	29	33	9	15	76		1810010K12Rik	RIKEN cDNA 1810010K12 gene	A	A	P	P	A	A	A	A	A	A	A	A	A
1435595_at	427	474	174	204	681	74	98	79	388	70	31	16	154		1810011O10Rik	RIKEN cDNA 1810011O10 gene	P	P	P	P	P	P	P	P	P	P	A	A	P
1451415_at	950	1315	402	621	1884	161	241	207	1003	113	31	10	203		1810011O10Rik	RIKEN cDNA 1810011O10 gene	P	P	P	P	P	P	P	P	P	P	A	A	P
1432444_a_at	626	485	564	528	487	369	979	555	542	804	880	1194	514		1810011O16Rik	RIKEN cDNA 1810011O16 gene	P	P	P	P	P	P	P	P	P	P	P	P	P
1427131_s_at	8661	12521	9386	10038	17061	2692	2848	2320	2924	3943	4508	5253	5679		1810012N18Rik	RIKEN cDNA 1810012N18 gene	P	P	P	P	P	P	P	P	P	P	P	P	P
1436548_at	118	105	85	131	162	505	437	521	473	161	177	167	525		1810012P15Rik	RIKEN cDNA 1810012P15 gene	P	P	P	P	P	P	P	P	P	P	P	P	P
1440234_at	114	132	60	115	193	532	474	380	316	182	232	215	435		1810012P15Rik	RIKEN cDNA 1810012P15 gene	P	P	A	P	P	P	P	P	P	P	P	P	P
1426843_at	142	174	229	174	236	215	187	132	216	199	185	178	121		1810013C15Rik	RIKEN cDNA 1810013C15 gene	P	A	P	P	A	P	A	P	P	P	P	P	A
1454614_at	1569	738	1388	1858	2018	439	650	820	588	786	951	1225	699		1810013D10Rik	RIKEN cDNA 1810013D10 gene	P	P	P	P	P	P	P	P	P	P	P	P	P
1434613_at	3833	7815	5207	6668	6281	8659	4616	4154	3343	4426	6178	7587	4868		1810013L24Rik	RIKEN cDNA 1810013L24 gene	P	P	P	P	P	P	P	P	P	P	P	P	P
1435546_a_at	1523	1675	1339	1604	2039	1381	858	1005	880	603	596	945	1574		1810013L24Rik	RIKEN cDNA 1810013L24 gene	P	P	P	P	P	P	P	P	P	P	P	P	P
1436478_at	161	397	228	278	286	739	447	326	293	275	215	198	473		1810013L24Rik	RIKEN cDNA 1810013L24 gene	P	P	P	P	P	P	P	P	P	P	P	P	P
1456875_at	476	846	636	726	1068	297	311	317	288	411	465	490	355		1810013L24Rik	RIKEN cDNA 1810013L24 gene	P	P	P	P	P	P	P	P	P	P	P	P	P
1429259_a_at	797	448	883	775	1163	522	664	900	884	1416	1089	782	863		1810014B01Rik	RIKEN cDNA 1810014B01 gene	P	P	P	P	P	P	P	P	P	P	P	P	P
1429260_at	99	173	268	375	459	4	27	57	57	181	141	59	41		1810014B01Rik	RIKEN cDNA 1810014B01 gene	P	P	P	P	P	A	A	A	A	P	P	A	P
1452626_a_at	377	213	350	457	447	73	120	355	305	189	118	123	347		1810014F10Rik	RIKEN cDNA 1810014F10 gene	P	P	P	P	P	A	P	P	P	P	A	A	P
1428550_at	103	108	48	34	34	1213	2470	1390	921	160	208	188	632		1810015A11Rik	RIKEN cDNA 1810015A11 gene	A	A	A	A	A	P	P	P	P	P	P	P	P
1424683_at	3961	619	555	695	333	3969	3261	4819	3584	1552	1757	10281	4201		1810015C04Rik	RIKEN cDNA 1810015C04 gene	P	P	P	P	P	P	P	P	P	P	P	P	P
1450505_a_at	668	103	149	199	107	549	655	878	782	299	290	1994	641		1810015C04Rik	RIKEN cDNA 1810015C04 gene	P	P	P	P	P	P	P	P	P	P	P	P	P
1417105_at	1530	770	1011	1118	992	1302	2718	2524	2036	1132	2568	2819	1930		1810017G16Rik	RIKEN cDNA 1810017G16 gene	P	P	P	P	P	P	P	P	P	P	P	P	P
1451381_at	1730	1368	3366	3134	2962	351	776	700	697	1299	2746	4958	1328		1810020D17Rik	RIKEN cDNA 1810020D17 gene	P	P	P	P	P	P	P	P	P	P	P	P	P
1450895_a_at	298	279	401	221	248	149	259	320	298	386	340	284	253		1810020G14Rik	RIKEN cDNA 1810020G14 gene	P	P	P	P	A	A	A	P	A	P	P	P	A
1417174_at	1253	850	2418	3391	2791	624	692	674	643	500	304	333	830		1810021J13Rik	RIKEN cDNA 1810021J13 gene	P	P	P	P	P	P	P	P	P	P	P	P	P
1434493_at	51	150	89	66	12	47	50	40	59	156	180	206	31		1810022K09Rik	RIKEN cDNA 1810022K09 gene	A	P	P	P	A	P	A	A	A	P	P	P	A
1436523_s_at	2080	1628	1811	843	1081	1537	2183	2147	1543	1443	2636	2518	1880		1810022K09Rik	RIKEN cDNA 1810022K09 gene	P	P	P	P	P	P	P	P	P	P	P	P	P
1426746_at	1453	1415	1703	1915	1941	2674	2118	1426	2143	2598	2822	1933	1497		1810026J23Rik	RIKEN cDNA 1810026J23 gene	P	P	P	P	P	P	P	P	P	P	P	P	P
1452175_at	192	140	208	180	288	237	216	319	242	242	201	152	171		1810026J23Rik	RIKEN cDNA 1810026J23 gene	P	P	P	P	P	P	P	P	P	P	P	P	P
1430985_at	2661	1801	3077	2767	1474	824	1680	1788	1460	2047	3552	3171	1322		1810027O10Rik	RIKEN cDNA 1810027O10 gene	P	P	P	P	P	P	P	P	P	P	P	P	P
1423289_a_at	205	258	323	221	179	211	406	220	230	320	405	661	208		1810029B16Rik	RIKEN cDNA 1810029B16 gene	P	P	P	P	P	P	P	P	P	P	P	P	P
1441400_at	12	213	63	18	9	61	47	15	27	163	194	168	3		1810029B16Rik	RIKEN cDNA 1810029B16 gene	A	P	A	A	A	A	A	A	A	A	P	A	A
1430292_a_at	1335	453	919	1244	1049	418	670	812	655	719	763	741	649		1810030N24Rik	RIKEN cDNA 1810030N24 gene	P	P	P	P	P	P	P	P	P	P	P	P	P
1433867_at	491	378	496	333	368	224	307	256	282	627	494	304	374		1810030O07Rik	RIKEN cDNA 1810030O07 gene	P	P	P	P	P	P	P	P	P	P	P	P	P
1427879_at	1596	770	1178	1048	957	749	973	860	989	1856	1242	1396	481		1810031K17Rik	RIKEN cDNA 1810031K17 gene	P	P	P	P	P	P	P	P	P	P	P	P	P
1453344_at	180	285	193	157	195	353	412	213	195	275	331	236	74		1810032O08Rik	RIKEN cDNA 1810032O08 gene	A	A	P	A	A	P	A	P	A	P	P	A	A
1452695_at	7	6	4	2	8	25	16	34	27	4	64	259	26		1810033M07Rik	RIKEN cDNA 1810033M07 gene	A	A	A	A	A	A	A	A	A	A	A	P	A
1428337_at	884	633	1043	718	657	906	1362	954	1022	1019	1615	1527	1045		1810034K20Rik	RIKEN cDNA 1810034K20 gene	P	P	P	P	P	P	P	P	P	P	P	P	P
1450067_a_at	256	433	385	301	269	302	318	211	272	308	473	583	314		1810034K20Rik	RIKEN cDNA 1810034K20 gene	P	P	P	P	P	P	A	P	P	P	P	P	P
1428554_a_at	3030	1232	2224	2028	1601	1280	2021	1764	1702	2008	3219	2833	1745		1810035L17Rik	RIKEN cDNA 1810035L17 gene	P	P	P	P	P	P	P	P	P	P	P	P	P
1428202_at	709	362	639	336	353	442	482	706	633	917	635	723	269		1810037C20Rik	RIKEN cDNA 1810037C20 gene	P	P	P	P	P	P	P	P	P	P	P	P	P
1424365_at	10097	7506	8430	10851	7542	1039	1739	3316	2950	6658	10051	13785	3090		1810037I17Rik	RIKEN cDNA 1810037I17 gene	P	P	P	P	P	P	P	P	P	P	P	P	P
1429440_at	435	119	251	1470	283	386	585	689	578	2948	6756	2806	626		1810041L15Rik	RIKEN cDNA 1810041L15 gene	P	A	A	P	A	P	P	P	P	P	P	P	P
1455515_at	1055	467	767	2594	870	1397	1360	1944	1505	4634	11321	4181	1680		1810041L15Rik	RIKEN cDNA 1810041L15 gene	P	P	P	P	P	P	P	P	P	P	P	P	P
1424087_at	806	754	957	771	888	749	1050	986	986	1255	968	862	713		1810042K04Rik	RIKEN cDNA 1810042K04 gene	P	P	P	P	P	P	P	P	P	P	P	P	P
1424267_at	198	99	163	152	122	164	312	395	220	93	23	24	161		1810043G02Rik	RIKEN cDNA 1810043G02 gene	A	A	P	A	A	A	P	P	A	A	A	A	A
1451288_s_at	339	183	227	190	111	443	425	385	285	123	89	23	276		1810043G02Rik	RIKEN cDNA 1810043G02 gene	P	P	P	P	A	P	P	P	P	P	P	A	P
1457826_a_at	1797	1005	1841	1843	1239	476	1257	1419	1380	1430	1344	1063	1401		1810043H04Rik	RIKEN cDNA 1810043H04 gene	P	P	P	P	P	P	P	P	P	P	P	P	P
1452745_at	921	381	864	1038	732	784	1269	1324	1308	1137	889	961	550		1810044A24Rik	RIKEN cDNA 1810044A24 gene	P	P	P	P	P	P	P	P	P	P	P	P	P
1449412_at	4008	1287	3097	4150	3579	4775	5856	5529	4352	2740	4415	6369	3723		1810046J19Rik	RIKEN cDNA 1810046J19 gene	P	P	P	P	P	P	P	P	P	P	P	P	P
1418319_at	1607	767	1485	1772	1974	1508	1846	2156	2116	1826	1784	2487	2775		1810047C23Rik	RIKEN cDNA 1810047C23 gene	P	P	P	P	P	P	P	P	P	P	P	P	P
1426991_at	562	407	715	488	435	696	1046	1333	1074	459	386	337	721		1810048J11Rik	RIKEN cDNA 1810048J11 gene	P	P	P	P	P	P	P	P	P	P	P	P	P
1453020_at	980	520	646	585	769	450	413	469	524	717	803	760	546		1810048J11Rik	RIKEN cDNA 1810048J11 gene	P	P	P	P	P	A	A	P	A	P	P	P	A
1425333_at	455	396	432	487	388	195	328	341	333	243	162	142	294		1810048P08Rik	RIKEN cDNA 1810048P08 gene	P	P	P	P	P	P	P	P	P	P	A	P	P
1441878_s_at	252	117	171	380	415	59	128	220	206	161	141	134	156		1810049H13Rik	RIKEN cDNA 1810049H13 gene	P	A	P	P	P	A	P	P	P	P	A	A	P
1426577_a_at	292	160	227	224	221	151	401	493	410	361	193	187	235		1810054G18Rik	RIKEN cDNA 1810054G18 gene	P	A	P	P	A	P	P	P	P	P	P	P	P
1431337_a_at	1872	1179	1470	1881	1776	761	849	1317	1157	1274	1107	954	899		1810055E12Rik	RIKEN cDNA 1810055E12 gene	P	P	P	P	P	P	P	P	P	P	P	P	P
1425921_a_at	1087	617	1001	845	807	791	1085	726	639	1277	911	852	603		1810055G02Rik	RIKEN cDNA 1810055G02 gene	P	P	P	P	P	P	P	P	P	P	P	P	P
1430539_at	568	88	97	101	39	71	97	101	196	32	59	16	63		1810057P16Rik	RIKEN cDNA 1810057P16 gene	P	A	P	A	A	A	A	P	P	A	A	A	A
1440975_at	3198	398	444	386	267	326	449	217	592	407	741	483	221		1810057P16Rik	RIKEN cDNA 1810057P16 gene	P	P	P	P	P	P	P	P	P	P	P	P	P
1452923_at	371	448	661	447	451	500	728	454	390	598	1394	1369	541		1810058I14Rik	RIKEN cDNA 1810058I14 gene	P	P	P	P	P	P	P	P	P	P	P	P	P
1436339_at	3612	2048	2045	2264	1836	620	1183	783	1151	962	2345	3681	1061		1810058I24Rik	RIKEN cDNA 1810058I24 gene	P	P	P	P	P	P	P	P	P	P	P	P	P
1442129_at	332	278	278	443	325	310	205	252	185	404	741	676	211		1810058I24Rik	RIKEN cDNA 1810058I24 gene	P	P	P	P	P	P	A	P	P	P	P	P	A
1436963_x_at	135	84	142	149	95	32	65	77	97	163	211	277	60		1810059G22Rik	RIKEN cDNA 1810059G22 gene	A	P	P	P	P	A	A	A	A	P	P	P	A
1449842_at	917	260	800	615	575	57	179	140	307	529	988	1339	166		1810059G22Rik	RIKEN cDNA 1810059G22 gene	P	P	P	P	P	A	P	P	P	P	P	P	P
1429061_at	167	233	179	154	232	201	117	211	220	278	188	157	188		1810063B05Rik	RIKEN cDNA 1810063B05 gene	P	P	P	P	P	P	A	P	P	P	P	P	P
1435864_a_at	2756	607	925	1151	955	553	783	1103	951	1113	883	982	1094		1810063B05Rik	RIKEN cDNA 1810063B05 gene	P	P	P	P	P	P	P	P	P	P	P	P	P
1427905_at	390	224	402	418	422	370	450	478	433	414	294	395	308		1810063B07Rik	RIKEN cDNA 1810063B07 gene	P	P	P	P	P	P	P	P	P	P	P	P	P
1424253_at	719	833	781	760	624	580	864	552	734	1167	1181	1053	557		1810073G14Rik	RIKEN cDNA 1810073G14 gene	P	P	P	P	P	P	P	P	P	P	P	P	P
1451283_at	804	683	789	972	782	591	931	726	873	1271	1302	1194	854		1810073G14Rik	RIKEN cDNA 1810073G14 gene	P	P	P	P	P	P	P	P	P	P	P	P	P
1427294_a_at	871	650	1249	1082	799	798	1758	1099	1314	1544	1505	1335	594		1810073N04Rik	RIKEN cDNA 1810073N04 gene	P	P	P	P	P	P	P	P	P	P	P	P	P
1427295_at	387	339	495	381	313	466	603	419	535	476	610	867	354		1810073N04Rik	RIKEN cDNA 1810073N04 gene	P	P	P	P	A	P	P	P	P	P	P	P	P
1456241_a_at	3176	3963	2733	3465	3113	3679	3493	2808	3097	3240	4660	6925	3555		1810073N04Rik	RIKEN cDNA 1810073N04 gene	P	P	P	P	P	P	P	P	P	P	P	P	P
1429008_at	183	465	481	287	347	160	286	360	323	386	285	381	321		1810074P20Rik	RIKEN cDNA 1810074P20 gene	P	P	P	P	P	P	P	P	P	P	P	P	P
1436224_at	395	412	563	581	685	61	52	86	139	158	292	213	166		18-day embryo whole body cDNA, RIKEN full-length enriched library, clone:1110061F19 product:unclassifiable, full insert sequence	18-day embryo whole body cDNA, RIKEN full-length enriched library, clone:1110061F19 product:unclassifiable, full insert sequence	P	P	P	P	P	P	P	A	P	P	P	P	P
1440371_at	50	9	29	43	78	1061	670	1605	1579	275	149	122	3948		2 days neonate sympathetic ganglion cDNA, RIKEN full-length enriched library, clone:7120457A19 product:unclassifiable, full insert sequence	2 days neonate sympathetic ganglion cDNA, RIKEN full-length enriched library, clone:7120457A19 product:unclassifiable, full insert sequence	A	A	A	A	A	P	P	P	P	P	P	A	P
1457077_at	31	76	20	30	68	422	161	158	287	75	43	22	461		2 days neonate sympathetic ganglion cDNA, RIKEN full-length enriched library, clone:7120457A19 product:unclassifiable, full insert sequence	2 days neonate sympathetic ganglion cDNA, RIKEN full-length enriched library, clone:7120457A19 product:unclassifiable, full insert sequence	A	A	A	A	A	P	P	P	P	A	A	A	P
1455724_at	232	866	665	604	318	70	102	108	389	1657	871	6417	402		2 days pregnant adult female oviduct cDNA, RIKEN full-length enriched library, clone:E230030F22 product:unclassifiable, full insert sequence	2 days pregnant adult female oviduct cDNA, RIKEN full-length enriched library, clone:E230030F22 product:unclassifiable, full insert sequence	P	P	P	P	P	A	A	P	P	P	P	P	P
1442137_at	77	68	168	113	138	78	54	57	58	139	187	227	123		2010000I03Rik	RIKEN cDNA 2010000I03 gene	A	A	P	A	A	A	P	P	P	P	P	P	A
1423306_at	690	409	647	2907	6025	97	122	182	195	222	562	1050	685		2010002N04Rik	RIKEN cDNA 2010002N04 gene	P	P	P	P	P	P	P	P	P	P	P	P	P
1428542_at	626	568	929	481	454	842	1262	1158	1035	754	734	535	849		2010003J03Rik	RIKEN cDNA 2010003J03 gene	P	P	P	P	P	P	P	P	P	P	P	P	P
1455341_at	510	403	342	409	490	390	229	353	306	821	666	614	462		2010003J03Rik	RIKEN cDNA 2010003J03 gene	P	P	P	P	P	P	P	P	P	P	P	P	P
1429115_at	478	201	368	451	335	11	126	11	94	219	208	267	34		2010003O02Rik	RIKEN cDNA 2010003O02 gene	A	A	P	P	A	A	A	A	A	P	A	A	A
1425211_at	446	327	444	532	651	435	569	641	470	586	430	374	499		2010003O18Rik	RIKEN cDNA 2010003O18 gene	P	P	P	P	P	P	P	P	P	P	P	P	A
1447568_at	81	553	212	176	158	231	117	44	86	314	142	55	61		2010003O18Rik	RIKEN cDNA 2010003O18 gene	A	P	P	P	P	P	A	P	P	P	P	A	A
1431920_a_at	165	130	17	61	50	129	340	792	703	28	21	19	423		2010004A03Rik	RIKEN cDNA 2010004A03 gene	P	A	A	A	A	P	P	P	P	A	A	A	P
1455646_at	520	146	174	288	153	112	158	194	323	180	304	236	171		2010004M13Rik	RIKEN cDNA 2010004M13 gene	P	A	P	P	A	A	P	P	P	P	P	A	A
1448840_at	377	213	291	335	342	446	572	751	436	228	293	354	400		2010004O20Rik	RIKEN cDNA 2010004O20 gene	P	A	P	P	P	P	P	P	P	P	P	P	P
1433498_at	992	714	863	959	993	969	918	1174	921	943	482	516	1246		2010005J08Rik	RIKEN cDNA 2010005J08 gene	P	P	P	P	P	P	P	P	P	P	P	P	P
1433499_at	276	173	205	231	376	276	291	447	365	242	171	211	252		2010005J08Rik	RIKEN cDNA 2010005J08 gene	P	A	P	P	A	P	P	P	P	P	A	P	A
1438382_x_at	107	36	120	80	96	64	153	136	202	98	95	131	43		2010005J08Rik	RIKEN cDNA 2010005J08 gene	A	A	A	A	A	P	P	P	P	P	A	P	A
1456587_x_at	1748	1339	1238	1376	1427	1267	1342	1837	1611	1497	870	1057	1658		2010005J08Rik	RIKEN cDNA 2010005J08 gene	P	P	P	P	P	P	P	P	P	P	P	P	P
1429255_at	220	176	206	190	153	107	203	154	189	283	160	185	163		2010007H12Rik	RIKEN cDNA 2010007H12 gene	P	P	P	P	P	P	P	P	P	P	P	P	P
1452446_a_at	2508	2299	2960	3697	3249	2606	2563	2886	3100	2938	2553	2417	2325		2010008E23Rik	RIKEN cDNA 2010008E23 gene	P	P	P	P	P	P	P	P	P	P	P	P	P
1424694_at	534	2639	2434	802	657	339	424	675	657	124	57	60	661		2010011I20Rik	RIKEN cDNA 2010011I20 gene	P	P	P	P	P	P	P	P	P	A	A	A	P
1424695_at	101	648	840	191	145	45	39	76	118	9	11	14	63		2010011I20Rik	RIKEN cDNA 2010011I20 gene	A	P	P	P	A	A	A	A	A	A	A	A	A
1451450_at	314	3784	2968	714	423	202	329	370	440	80	22	18	336		2010011I20Rik	RIKEN cDNA 2010011I20 gene	P	P	P	P	P	A	P	P	P	A	A	A	A
1450943_at	438	299	290	179	174	203	357	215	262	431	389	253	195		2010012C16Rik	RIKEN cDNA 2010012C16 gene	P	P	P	P	P	P	P	P	P	P	P	P	P
1419299_at	198	543	558	460	427	216	647	464	412	515	480	529	409		2010012O05Rik	RIKEN cDNA 2010012O05 gene	P	P	P	P	P	P	P	P	P	P	P	P	P
1439561_at	112	276	215	129	219	217	200	390	255	148	147	165	326		2010012O05Rik	RIKEN cDNA 2010012O05 gene	P	P	P	P	P	P	P	P	P	P	P	P	P
1420642_a_at	9570	6749	7366	7548	6005	7607	6837	8235	6385	5128	6626	7172	8731		2010100O12Rik	RIKEN cDNA 2010100O12 gene	P	P	P	P	P	P	P	P	P	P	P	P	P
1425193_at	850	636	828	1090	1234	382	230	286	413	669	670	636	424		2010106G01Rik	RIKEN cDNA 2010106G01 gene	P	P	P	P	P	P	P	P	P	P	P	P	P
1450459_at	397	448	433	546	760	331	151	106	308	935	556	409	175		2010106G01Rik	RIKEN cDNA 2010106G01 gene	P	P	P	P	P	P	A	P	P	P	P	P	P
1452225_at	1660	2308	3789	2420	2543	1146	830	628	1328	2850	2199	1319	1675		2010106G01Rik	RIKEN cDNA 2010106G01 gene	P	P	P	P	P	P	P	P	P	P	P	P	P
1428258_at	1043	603	557	997	881	821	690	1047	728	1206	1911	1911	947		2010107E04Rik	RIKEN cDNA 2010107E04 gene	P	P	P	P	P	P	P	P	P	P	P	P	P
1424072_at	418	67	152	158	108	2882	3231	2419	1355	612	288	165	1592		2010107G23Rik	RIKEN cDNA 2010107G23 gene	P	A	P	P	A	P	P	P	P	P	P	P	P
1456204_at	4346	463	1054	1998	2264	705	1028	1338	974	935	1227	659	1039		2010107H07Rik	RIKEN cDNA 2010107H07 gene	P	P	P	P	P	P	P	P	P	P	P	P	P
1429100_at	335	183	189	134	163	200	203	310	294	345	250	265	202		2010109K11Rik	RIKEN cDNA 2010109K11 gene	P	P	P	A	P	P	P	P	P	P	P	P	P
1435524_at	2208	2549	2751	2039	1811	4154	2852	2047	2362	4341	3600	2481	2613		2010109N14Rik	RIKEN cDNA 2010109N14 gene	P	P	P	P	P	P	P	P	P	P	P	P	P
1447896_s_at	8715	13277	10101	11094	9975	16303	9927	7374	9004	16125	14729	10961	10877		2010109N14Rik	RIKEN cDNA 2010109N14 gene	P	P	P	P	P	P	P	P	P	P	P	P	P
1431510_s_at	519	473	568	437	449	318	508	381	370	342	584	605	591		2010110K16Rik	RIKEN cDNA 2010110K16 gene	P	P	P	P	P	P	P	P	P	P	P	P	P
1435089_at	141	81	55	109	38	131	209	297	244	181	179	166	97		2010111I01Rik	RIKEN cDNA 2010111I01 gene	A	A	A	A	A	P	P	P	P	P	P	P	P
1458947_at	71	248	59	90	58	103	60	97	128	272	293	343	104		2010111I01Rik	RIKEN cDNA 2010111I01 gene	P	P	A	P	A	P	A	P	P	P	P	P	P
1460695_a_at	195	121	81	180	123	156	169	309	511	348	333	383	331		2010111I01Rik	RIKEN cDNA 2010111I01 gene	A	A	A	P	A	P	A	P	P	P	P	P	P
1429042_at	845	387	578	598	585	727	358	295	348	505	555	566	207		2010200O16Rik	RIKEN cDNA 2010200O16 gene	P	P	P	P	P	P	P	P	P	P	P	P	P
1421498_a_at	743	189	197	157	88	353	446	1038	1012	237	149	85	1554		2010204K13Rik	RIKEN cDNA 2010204K13 gene	P	P	P	P	P	P	P	P	P	P	P	A	P
1428582_at	903	880	1533	1496	1498	674	1057	751	701	1282	693	342	783		2010208K18Rik	RIKEN cDNA 2010208K18 gene	P	P	P	P	P	P	P	P	P	P	P	P	P
1452170_at	772	462	629	461	476	243	511	930	699	467	269	237	416		2010209O12Rik	RIKEN cDNA 2010209O12 gene	P	P	P	P	P	P	P	P	P	P	P	P	P
1452861_at	12	76	83	67	86	1355	1809	3540	3173	539	118	50	4156		2010300C02Rik /// LOC639555	RIKEN cDNA 2010300C02 gene /// similar to Y59A8B.19	A	A	A	P	A	P	P	P	P	P	A	A	P
1424520_at	487	256	402	364	419	983	833	835	750	242	192	303	504		2010305A19Rik	RIKEN cDNA 2010305A19 gene	P	P	P	P	P	P	P	P	P	P	P	P	P
1448027_at	170	377	241	190	218	379	472	454	372	410	307	784	318		2010305B15Rik	RIKEN cDNA 2010305B15 gene	P	P	P	P	P	P	P	P	P	P	P	P	P
1417075_at	755	579	650	552	592	1461	1469	1089	913	921	777	338	985		2010309E21Rik	RIKEN cDNA 2010309E21 gene	P	P	P	P	P	P	P	P	P	P	P	P	P
1435031_at	345	491	338	238	191	309	572	259	190	337	233	137	123		2010310D06Rik	RIKEN cDNA 2010310D06 gene	P	P	P	P	P	P	P	P	P	P	P	P	P
1417573_at	3315	2353	2030	1701	1951	2158	2217	1743	1869	2167	2873	3546	2092		2010311D03Rik	RIKEN cDNA 2010311D03 gene	P	P	P	P	P	P	P	P	P	P	P	P	P
1438238_at	158	111	124	83	211	187	85	106	110	271	278	156	302		2010315B03Rik	RIKEN cDNA 2010315B03 gene	P	P	P	P	P	P	P	P	P	P	P	P	P
1423817_s_at	1918	2372	2619	2094	1762	1574	2804	1708	2267	2935	2157	2280	1985		2010315L10Rik	RIKEN cDNA 2010315L10 gene	P	P	P	P	P	P	P	P	P	P	P	P	P
1451130_at	1993	2285	2970	2099	1712	1836	3076	1597	2316	3019	2231	2030	1992		2010315L10Rik	RIKEN cDNA 2010315L10 gene	P	P	P	P	P	P	P	P	P	P	P	P	P
1460456_at	370	199	163	101	95	27	101	88	118	109	301	315	148		2010316F05Rik	RIKEN cDNA 2010316F05 gene	P	P	P	P	P	A	P	P	P	P	P	P	P
1429404_at	53	191	236	73	14	37	31	38	30	1966	243	18	61		2010317E24Rik	RIKEN cDNA 2010317E24 gene	A	A	P	A	A	A	A	A	A	P	P	A	A
1429405_at	32	69	119	14	65	46	34	58	19	652	113	38	14		2010317E24Rik	RIKEN cDNA 2010317E24 gene	P	P	P	A	A	A	A	A	A	P	P	A	A
1438615_x_at	43	171	121	94	14	51	74	35	65	335	219	102	52		2010317E24Rik	RIKEN cDNA 2010317E24 gene	A	P	P	A	A	A	A	P	A	P	P	P	P
1434792_at	434	378	709	671	352	177	445	304	288	442	360	250	268		2010320M18Rik	RIKEN cDNA 2010320M18 gene	P	P	P	P	P	P	P	P	P	P	P	P	P
1426347_at	1023	1055	1271	1063	992	897	935	667	725	2442	2144	1652	1066		2010321M09Rik	RIKEN cDNA 2010321M09 gene	P	P	P	P	P	P	P	P	P	P	P	P	P
1428400_at	20	33	24	9	49	450	829	433	374	927	253	22	273		2200002K05Rik	RIKEN cDNA 2200002K05 gene	A	A	A	A	A	P	P	P	P	P	P	A	P
1431831_at	155	187	140	145	222	381	276	350	280	294	235	319	296		2210009G21Rik	RIKEN cDNA 2210009G21 gene	A	P	P	A	A	P	P	P	P	P	P	P	P
1419327_at	2419	1264	1769	1628	2364	3060	2093	2325	2410	1241	30	126	2376		2210010A19Rik	RIKEN cDNA 2210010A19 gene	P	P	P	P	P	P	P	P	P	A	A	A	P
1428200_a_at	51	139	65	148	29	51	39	35	28	108	94	207	32		2210010A19Rik	RIKEN cDNA 2210010A19 gene	A	A	P	P	A	A	A	A	A	A	A	P	A
1436372_a_at	74	47	96	86	57	53	80	80	116	89	137	262	20		2210010A19Rik	RIKEN cDNA 2210010A19 gene	P	P	P	P	A	A	A	A	P	A	P	P	A
1452705_at	234	404	294	593	153	15	140	86	81	667	783	1316	23		2210010A19Rik	RIKEN cDNA 2210010A19 gene	A	P	P	P	A	A	A	A	A	A	P	P	A
1456023_at	103	128	189	144	144	358	287	258	206	244	176	199	273		2210010B09Rik	RIKEN cDNA 2210010B09 gene	P	P	P	P	P	P	P	P	P	P	P	P	P
1419124_at	96	37	67	77	77	165	278	272	258	171	163	319	163		2210010L05Rik	RIKEN cDNA 2210010L05 gene	P	A	A	P	A	P	P	P	P	P	P	P	P
1424463_at	3863	1272	805	501	475	11974	6847	8339	6243	4673	5009	9661	11489		2210010L05Rik	RIKEN cDNA 2210010L05 gene	P	P	P	P	P	P	P	P	P	P	P	P	P
1424464_s_at	136	29	61	41	40	537	445	849	466	209	225	430	522		2210010L05Rik	RIKEN cDNA 2210010L05 gene	P	P	P	P	A	P	P	P	P	P	P	P	P
1423989_at	930	1516	1335	1887	1303	1037	1804	1448	2178	1537	1413	1418	1080		2210010N04Rik	RIKEN cDNA 2210010N04 gene	P	P	P	P	P	P	P	P	P	P	P	P	P
1434175_s_at	495	701	529	754	726	886	767	1221	884	496	539	770	1027		2210010N04Rik	RIKEN cDNA 2210010N04 gene	P	P	P	P	P	P	P	P	P	P	P	P	P
1429953_at	309	8	11	8	25	2	10	30	27	169	786	1023	67		2210011C24Rik	RIKEN cDNA 2210011C24 gene	P	A	A	A	A	A	A	A	A	P	P	P	P
1418662_at	152	51	33	8	137	100	53	58	63	137	187	391	109		2210012G02Rik	RIKEN cDNA 2210012G02 gene	P	A	A	A	A	A	A	A	A	A	P	P	P
1431284_a_at	949	1066	2393	3151	2376	2076	2647	1848	2129	3831	3363	3156	1083		2210013K02Rik	RIKEN cDNA 2210013K02 gene	P	P	P	P	P	P	P	P	P	P	P	P	P
1430538_at	3937	1589	2086	2259	2046	2314	3106	3260	3055	2611	3233	3464	2209		2210013O21Rik	RIKEN cDNA 2210013O21 gene	P	P	P	P	P	P	P	P	P	P	P	P	P
1429073_at	119	209	203	234	229	182	236	432	242	161	166	233	305		2210015D19Rik	RIKEN cDNA 2210015D19 gene	P	P	P	P	P	P	P	P	P	P	P	P	P
1438285_at	331	395	611	857	1004	301	454	385	362	387	321	261	414		2210015D19Rik	RIKEN cDNA 2210015D19 gene	P	P	P	P	P	P	P	P	P	P	P	P	P
1428331_at	2067	529	1132	1254	803	418	752	464	621	916	869	698	518		2210016F16Rik	RIKEN cDNA 2210016F16 gene	P	P	P	P	P	P	P	P	P	P	P	P	P
1452744_at	376	28	152	235	190	211	159	217	132	138	137	129	136		2210016F16Rik	RIKEN cDNA 2210016F16 gene	P	A	P	P	P	P	P	P	P	A	P	A	P
1433690_at	602	318	552	516	392	837	2085	2496	1721	781	610	655	1248		2210016L21Rik	RIKEN cDNA 2210016L21 gene	P	P	P	P	P	P	P	P	P	P	P	P	P
1435015_at	135	96	204	157	182	144	190	102	175	360	214	222	67		2210018M03Rik	RIKEN cDNA 2210018M03 gene	P	P	P	P	P	P	P	P	P	P	P	P	P
1424928_at	265	417	574	611	679	354	680	732	595	979	676	656	531		2210018M11Rik	RIKEN cDNA 2210018M11 gene	P	P	P	P	P	P	P	P	P	P	P	P	P
1430028_at	189	274	246	295	375	391	556	527	435	500	302	400	550		2210018M11Rik	RIKEN cDNA 2210018M11 gene	P	P	P	P	P	P	P	P	P	P	P	P	P
1451409_at	285	109	229	219	250	96	189	164	186	283	312	294	177		2210021J22Rik	RIKEN cDNA 2210021J22 gene	P	P	P	P	P	P	P	P	P	P	P	P	P
1434585_at	170	740	356	303	160	352	380	268	220	476	1462	1840	162		2210038L17Rik	RIKEN cDNA 2210038L17 gene	A	P	P	P	P	P	P	P	P	P	P	P	P
1427975_at	13	5	5	9	9	378	818	1736	1121	22	4	11	843		2210403B10Rik	RIKEN cDNA 2210403B10 gene	A	A	A	A	A	P	P	P	P	A	A	A	P
1428562_at	1946	1717	1046	526	651	855	696	1054	1019	314	255	234	985		2210403K04Rik	RIKEN cDNA 2210403K04 gene	P	P	P	P	P	P	P	P	P	P	P	P	P
1437087_at	1402	1544	546	579	440	7322	4688	4122	3478	2550	6894	8183	5629		2210408K08Rik	RIKEN cDNA 2210408K08 gene	P	P	P	P	P	P	P	P	P	P	P	P	P
1433645_at	2301	2552	1906	1054	767	1179	1175	716	1578	4763	25068	13870	2696		2210409B22Rik	RIKEN cDNA 2210409B22 gene	P	P	P	P	P	P	P	P	P	P	P	P	P
1435916_at	366	195	253	262	431	235	179	212	228	248	137	164	543		2210410P13Rik	RIKEN cDNA 2210410P13 gene	P	P	P	P	P	P	P	P	P	P	P	P	P
1433530_at	172	492	665	298	281	1016	461	330	470	410	300	318	49		2210411K19Rik	RIKEN cDNA 2210411K19 gene	P	P	P	P	P	P	P	P	P	P	P	P	P
1423519_at	925	1650	1349	667	857	1325	1269	502	660	1489	838	519	513		2210412D01Rik	RIKEN cDNA 2210412D01 gene	P	P	P	P	P	P	P	P	P	P	P	P	P
1420328_at	76	48	49	53	23	168	38	55	117	523	517	106	102		2210417D09Rik	RIKEN cDNA 2210417D09 gene	A	A	A	A	A	A	A	A	A	P	P	A	A
1428500_at	712	659	501	673	658	300	171	242	338	677	432	339	437		2210419D22Rik	RIKEN cDNA 2210419D22 gene	P	P	P	P	A	A	A	A	A	P	P	A	A
1453008_at	691	76	218	273	152	1095	2660	4601	3546	5587	1028	332	3290		2300002D11Rik	RIKEN cDNA 2300002D11 gene	P	A	P	P	A	P	P	P	P	P	P	P	P
1428836_at	247	232	325	351	496	305	412	423	346	287	433	427	286		2300009A05Rik	RIKEN cDNA 2300009A05 gene	P	P	P	P	P	P	P	P	P	P	P	P	P
1439262_x_at	232	449	260	288	380	169	220	267	308	263	228	240	446		2310001A20Rik	RIKEN cDNA 2310001A20 gene	A	P	P	P	A	A	A	A	P	A	P	P	P
1452159_at	3845	3640	3939	5050	4387	4274	2451	3480	2994	3747	2746	1847	3248		2310001A20Rik	RIKEN cDNA 2310001A20 gene	P	P	P	P	P	P	P	P	P	P	P	P	P
1424872_at	581	1029	529	613	919	694	691	506	504	2295	2016	958	768		2310001H12Rik /// LOC636362 /// LOC666849	RIKEN cDNA 2310001H12 gene /// similar to zinc finger protein 709 /// similar to zinc finger protein 665	P	P	P	P	P	P	P	P	P	P	P	P	P
1431340_a_at	657	1522	1246	1310	1498	653	735	470	495	602	659	1297	673		2310002J21Rik	RIKEN cDNA 2310002J21 gene	P	P	P	P	P	P	P	P	P	P	P	P	P
1452883_a_at	1387	1862	2770	2093	1838	1812	2958	1680	1263	1483	1363	1496	1757		2310002J21Rik	RIKEN cDNA 2310002J21 gene	P	P	P	P	P	P	P	P	P	P	P	P	P
1456393_at	3787	10785	9318	5781	5079	5704	5134	5021	4380	3500	11954	4338	4679		2310002J21Rik	RIKEN cDNA 2310002J21 gene	P	P	P	P	P	P	P	P	P	P	P	P	P
1428824_at	2353	1031	1442	1737	1397	1955	1961	2054	1714	2002	1444	1815	1794		2310003C23Rik	RIKEN cDNA 2310003C23 gene	P	P	P	P	P	P	P	P	P	P	P	P	P
1423206_s_at	1359	993	1784	1010	883	1165	1976	1643	1688	1414	2059	1649	1749		2310003F16Rik	RIKEN cDNA 2310003F16 gene	P	P	P	P	P	P	P	P	P	P	P	P	P
1455850_at	171	245	375	230	270	588	1027	482	301	375	181	195	128		2310003H01Rik	RIKEN cDNA 2310003H01 gene	A	P	P	A	A	P	P	P	P	P	P	A	A
1428745_a_at	631	330	676	633	904	1252	1618	1518	1077	876	612	520	1631		2310003L22Rik	RIKEN cDNA 2310003L22 gene	P	P	P	P	P	P	P	P	P	P	P	P	P
1428698_at	533	510	682	866	834	536	393	577	582	633	293	207	367		2310004I03Rik	RIKEN cDNA 2310004I03 gene	P	P	P	P	P	P	P	P	P	P	P	P	P
1450987_a_at	842	594	729	823	937	621	577	664	717	1030	596	536	768		2310004I24Rik	RIKEN cDNA 2310004I24 gene	P	P	P	P	P	P	P	P	P	P	P	P	P
1416775_at	231	149	281	305	345	194	429	515	498	217	154	220	369		2310004L02Rik	RIKEN cDNA 2310004L02 gene	P	A	P	P	P	A	P	P	P	P	P	P	P
1427895_at	232	428	900	646	346	251	565	632	462	729	971	856	465		2310004N24Rik	RIKEN cDNA 2310004N24 gene	P	P	P	P	P	P	P	P	P	P	P	P	P
1429887_at	139	470	162	161	250	998	964	1499	1306	112	165	112	628		2310005C01Rik	RIKEN cDNA 2310005C01 gene	A	P	A	P	A	P	P	P	P	A	A	A	P
1425684_at	60	303	313	270	332	7	48	31	32	202	33	28	26		2310005E10Rik	RIKEN cDNA 2310005E10 gene	A	P	P	P	P	A	A	A	A	P	A	A	A
1453173_at	1492	1218	2040	2803	2568	44	64	230	146	656	169	27	229		2310005E10Rik	RIKEN cDNA 2310005E10 gene	P	P	P	P	P	A	P	A	P	P	P	A	P
1436040_at	459	621	652	639	639	514	903	621	768	1323	1234	930	549		2310005L22Rik	RIKEN cDNA 2310005L22 gene	P	P	P	P	P	P	P	P	P	P	P	P	P
1432447_a_at	314	457	476	422	317	816	1042	1007	823	1046	452	401	644		2310005N01Rik	RIKEN cDNA 2310005N01 gene	P	P	P	P	P	P	P	P	P	P	P	P	P
1428619_at	1923	1685	1932	1493	1936	984	1006	841	861	1634	1880	994	1017		2310005N03Rik	RIKEN cDNA 2310005N03 gene	P	P	P	P	P	P	P	P	P	P	P	P	P
1417877_at	147	1641	1896	376	152	178	182	283	267	75	61	62	184		2310005P05Rik	RIKEN cDNA 2310005P05 gene	P	P	P	P	P	P	P	P	P	P	A	A	P
1454233_at	19	80	32	56	92	64	31	56	47	267	430	278	62		2310006M14Rik	RIKEN cDNA 2310006M14 gene	A	A	A	A	A	A	A	A	A	P	P	P	A
1452924_at	219	292	164	36	73	74	65	59	68	148	140	545	86		2310007D09Rik	RIKEN cDNA 2310007D09 gene	P	P	P	A	A	A	A	A	A	P	P	P	P
1426939_at	1079	572	678	617	615	1269	999	1337	1260	1206	958	724	1388		2310007F12Rik	RIKEN cDNA 2310007F12 gene	P	P	P	P	P	P	P	P	P	P	P	P	P
1435170_at	808	426	613	767	674	1304	1273	2215	1601	1233	1288	838	2172		2310007F12Rik	RIKEN cDNA 2310007F12 gene	P	P	P	P	P	P	P	P	P	P	P	P	P
1424016_at	1175	449	931	819	680	713	1080	930	881	604	792	845	908		2310007F21Rik	RIKEN cDNA 2310007F21 gene	P	P	P	P	P	P	P	P	P	P	P	P	P
1452889_at	212	210	889	785	737	823	725	488	394	236	313	339	243		2310007H09Rik	RIKEN cDNA 2310007H09 gene	P	P	P	P	P	P	P	P	P	P	P	P	P
1436446_at	544	533	986	547	798	380	534	906	925	510	262	227	487		2310007O11Rik	RIKEN cDNA 2310007O11 gene	P	P	P	P	P	P	P	P	P	P	P	P	P
1451171_at	1668	638	569	481	359	26	67	63	103	511	478	269	138		2310008H04Rik	RIKEN cDNA 2310008H04 gene	P	P	P	P	P	A	A	A	P	P	P	P	P
1420548_a_at	256	62	168	129	125	93	214	290	234	107	114	199	226		2310008H09Rik	RIKEN cDNA 2310008H09 gene	P	P	P	P	A	P	P	P	P	A	P	P	P
1435690_at	486	550	786	595	552	488	644	26	311	757	451	490	224		2310008H09Rik	RIKEN cDNA 2310008H09 gene	P	P	P	P	P	P	A	P	P	P	P	P	P
1436541_at	259	279	275	217	201	190	267	127	111	306	285	221	95		2310008H09Rik	RIKEN cDNA 2310008H09 gene	P	P	P	P	P	P	P	P	P	P	P	P	P
1449139_at	1906	1514	2384	1908	1726	1108	1952	1804	1798	3467	2480	1536	1555		2310008M10Rik	RIKEN cDNA 2310008M10 gene	P	P	P	P	P	P	P	P	P	P	P	P	P
1435237_at	352	203	290	208	290	96	99	271	155	227	264	256	293		2310009A05Rik	RIKEN cDNA 2310009A05 gene	P	P	P	P	A	P	A	P	P	P	P	P	P
1452799_at	500	141	411	540	484	82	157	345	238	232	396	476	270		2310009E04Rik	RIKEN cDNA 2310009E04 gene	P	A	P	P	P	A	P	P	P	P	P	P	P
1452797_at	668	367	582	518	653	574	442	647	608	724	528	378	467		2310010B21Rik	RIKEN cDNA 2310010B21 gene	P	P	P	P	P	P	P	P	P	P	P	P	P
1429895_at	244	351	261	172	210	250	186	345	131	122	129	179	139		2310010G23Rik	RIKEN cDNA 2310010G23 gene	P	P	P	P	P	P	P	P	P	A	A	P	P
1439962_at	189	287	271	274	178	63	138	116	179	183	149	191	162		2310010J17Rik	RIKEN cDNA 2310010J17 gene	P	A	P	A	A	A	A	A	A	A	A	P	A
1429274_at	37	89	59	84	79	2143	2444	1699	1342	143	79	35	1059		2310010M24Rik	RIKEN cDNA 2310010M24 gene	A	A	P	P	A	P	P	P	P	P	P	A	P
1452043_at	833	447	703	560	399	303	421	483	512	394	622	672	348		2310011J03Rik	RIKEN cDNA 2310011J03 gene	P	P	P	P	P	P	P	P	P	P	P	P	P
1428914_at	754	525	317	217	128	555	627	602	1060	570	245	131	1094		2310014D11Rik	RIKEN cDNA 2310014D11 gene	P	P	P	P	A	P	P	P	P	P	P	A	P
1429226_at	121	145	192	123	130	37	18	11	30	74	18	29	41		2310014F06Rik	RIKEN cDNA 2310014F06 gene	A	P	P	P	A	A	A	A	A	A	A	A	A
1428695_at	242	81	153	148	81	374	796	814	818	35	40	57	283		2310014G06Rik	RIKEN cDNA 2310014G06 gene	A	A	P	A	A	P	P	P	P	A	A	A	P
1431299_a_at	840	355	235	184	203	652	508	264	585	1161	927	266	215		2310014H01Rik	RIKEN cDNA 2310014H01 gene	P	P	P	P	A	P	P	P	P	P	P	P	P
1435572_at	45	411	110	85	76	194	124	80	57	106	225	383	108		2310014L17Rik	RIKEN cDNA 2310014L17 gene	A	P	P	A	A	P	A	P	P	P	P	P	A
1436104_a_at	292	212	374	370	148	156	185	262	143	63	361	378	245		2310015A05Rik	RIKEN cDNA 2310015A05 gene	P	P	P	P	P	P	P	P	P	A	P	P	P
1436106_x_at	183	316	322	399	222	133	192	267	153	117	302	364	234		2310015A05Rik	RIKEN cDNA 2310015A05 gene	A	A	P	P	A	A	A	A	A	A	A	A	A
1455568_at	172	164	239	315	124	113	206	211	80	80	214	272	208		2310015A05Rik	RIKEN cDNA 2310015A05 gene	P	P	P	P	A	P	P	P	A	A	P	P	P
1439804_at	132	348	261	342	278	69	84	140	106	963	301	247	94		2310015A10Rik	RIKEN cDNA 2310015A10 gene	P	P	P	P	P	P	P	P	P	P	P	P	P
1428505_at	1650	1632	2266	2284	2131	463	650	582	687	1727	1249	1156	815		2310015N07Rik	RIKEN cDNA 2310015N07 gene	P	P	P	P	P	P	P	P	P	P	P	P	P
1428696_at	213	160	104	142	86	581	731	602	671	134	284	2709	572		2310015N21Rik	RIKEN cDNA 2310015N21 gene	P	P	P	P	P	P	P	P	P	P	P	P	P
1451322_at	655	85	499	814	1012	215	583	314	615	67	55	124	489		2310016A09Rik	RIKEN cDNA 2310016A09 gene	P	A	P	P	P	P	P	P	P	P	A	P	P
1424099_at	8237	2725	4782	3079	1811	118	393	263	598	1189	374	94	401		2310016C16Rik	RIKEN cDNA 2310016C16 gene	P	P	P	P	P	P	P	P	P	P	P	P	P
1435522_a_at	7132	1815	4727	3888	2740	1203	2360	1633	2534	3741	4262	4385	1835		2310016E02Rik	RIKEN cDNA 2310016E02 gene	P	P	P	P	P	P	P	P	P	P	P	P	P
1455006_at	3050	898	1883	2269	2321	886	1763	1817	2201	2128	1907	1851	2088		2310016M24Rik	RIKEN cDNA 2310016M24 gene	P	P	P	P	P	P	P	P	P	P	P	P	P
1428383_a_at	256	331	323	187	224	323	405	270	373	538	318	196	176		2310021P13Rik	RIKEN cDNA 2310021P13 gene	P	P	P	P	P	P	P	P	P	P	P	P	P
1440998_at	121	315	197	230	272	273	150	91	133	186	265	188	168		2310021P13Rik	RIKEN cDNA 2310021P13 gene	A	P	P	P	A	P	A	A	P	P	P	A	A
1431712_a_at	125	188	123	137	159	226	232	290	223	196	134	125	225		2310022A10Rik	RIKEN cDNA 2310022A10 gene	P	P	P	P	P	P	P	P	P	P	P	P	P
1428910_at	3564	6909	10796	15676	5826	1204	1395	713	1524	1513	1878	3276	1237		2310022B05Rik	RIKEN cDNA 2310022B05 gene	P	P	P	P	P	P	P	P	P	P	P	P	P
1452715_at	105	145	159	68	46	63	138	76	68	293	139	103	16		2310022K01Rik	RIKEN cDNA 2310022K01 gene	P	P	P	A	A	P	P	P	P	P	P	P	A
1428293_at	2557	1926	3238	2800	2493	2944	3477	2834	2570	2773	2314	2378	2349		2310022M17Rik	RIKEN cDNA 2310022M17 gene	P	P	P	P	P	P	P	P	P	P	P	P	P
1435351_at	52	150	213	51	43	259	634	395	494	431	128	33	277		2310026E23Rik	RIKEN cDNA 2310026E23 gene	A	P	P	A	A	P	P	P	P	P	P	A	P
1417030_at	123	144	298	61	152	91	141	126	110	234	195	130	83		2310028N02Rik	RIKEN cDNA 2310028N02 gene	P	P	P	P	P	P	P	P	P	P	P	P	P
1417031_at	84	68	202	91	88	60	93	126	117	211	153	101	55		2310028N02Rik	RIKEN cDNA 2310028N02 gene	A	A	P	P	P	P	P	P	P	P	P	P	P
1438082_at	239	456	448	323	264	184	234	230	190	212	279	264	179		2310028N02Rik	RIKEN cDNA 2310028N02 gene	P	P	P	P	P	P	P	P	P	P	P	P	P
1448552_s_at	251	511	684	295	361	150	312	104	184	692	438	371	166		2310028N02Rik	RIKEN cDNA 2310028N02 gene	P	P	P	P	P	P	P	P	P	P	P	P	P
1433616_a_at	5026	2742	4429	5394	4923	2400	3840	3732	3638	3930	4739	4216	4021		2310028O11Rik	RIKEN cDNA 2310028O11 gene	P	P	P	P	P	P	P	P	P	P	P	P	P
1436001_at	252	515	396	320	473	520	448	701	475	558	349	212	559		2310028O11Rik	RIKEN cDNA 2310028O11 gene	P	P	P	P	P	P	P	P	P	P	P	P	P
1455126_x_at	9152	5458	6553	7609	7535	4834	6942	6562	6282	6705	9318	9179	7247		2310028O11Rik	RIKEN cDNA 2310028O11 gene	P	P	P	P	P	P	P	P	P	P	P	P	P
1429213_at	482	192	464	427	582	424	574	423	315	327	158	24	345		2310030N02Rik	RIKEN cDNA 2310030N02 gene	P	P	P	P	P	P	P	P	P	P	P	A	P
1427356_at	35	20	28	68	55	68	38	47	36	1030	627	305	113		2310031A18Rik	RIKEN cDNA 2310031A18 gene	A	A	A	A	A	A	A	A	A	P	P	A	A
1460344_at	4319	1578	4372	4832	4336	67	113	167	282	153	96	159	367		2310033F14Rik	RIKEN cDNA 2310033F14 gene	P	P	P	P	P	A	P	P	P	P	P	P	P
1418999_at	188	165	282	233	238	323	280	672	458	275	221	233	357		2310033P09Rik	RIKEN cDNA 2310033P09 gene	P	P	P	P	P	P	P	P	P	P	P	P	P
1430126_at	59	72	68	36	51	65	93	119	67	119	216	308	45		2310035C23Rik	RIKEN cDNA 2310035C23 gene	A	A	A	A	A	P	P	P	A	P	P	P	A
1439138_at	83	653	167	183	222	150	100	85	68	333	469	430	53		2310035C23Rik	RIKEN cDNA 2310035C23 gene	A	P	P	P	P	P	P	P	P	P	P	P	P
1454707_at	162	77	132	112	178	507	231	274	222	95	318	365	286		2310035C23Rik	RIKEN cDNA 2310035C23 gene	P	A	P	A	A	P	P	P	P	P	P	P	P
1428241_at	423	364	562	741	824	325	510	636	444	584	345	378	460		2310035K24Rik	RIKEN cDNA 2310035K24 gene	P	A	P	P	A	A	P	P	P	P	A	P	P
1445881_at	52	1882	869	516	669	261	171	102	142	412	574	167	51		2310035P21Rik	RIKEN cDNA 2310035P21 gene	A	P	P	P	P	P	P	P	P	P	P	P	A
1428201_at	3327	3636	4149	3531	2910	3090	4194	3720	4025	4845	5054	5276	2726		2310036O22Rik	RIKEN cDNA 2310036O22 gene	P	P	P	P	P	P	P	P	P	P	P	P	P
1416171_at	1607	2092	2273	2473	2714	1435	1362	1180	1193	3044	2220	1384	901		2310037I24Rik	RIKEN cDNA 2310037I24 gene	P	P	P	P	P	P	P	P	P	P	P	P	P
1428074_at	1426	1369	1058	462	225	9241	6255	5956	3205	1040	1415	324	4559		2310037P21Rik	RIKEN cDNA 2310037P21 gene	P	P	P	P	A	P	P	P	P	P	P	P	P
1449274_at	472	169	240	240	233	116	119	227	139	233	159	170	232		2310038H17Rik	RIKEN cDNA 2310038H17 gene	P	P	P	P	P	A	A	P	P	P	P	P	P
1449275_at	631	193	276	331	442	107	88	219	168	220	174	190	212		2310038H17Rik	RIKEN cDNA 2310038H17 gene	P	P	P	P	P	P	P	P	P	P	P	P	P
1417348_at	602	888	722	423	327	396	530	469	322	487	872	880	351		2310039H08Rik	RIKEN cDNA 2310039H08 gene	P	P	P	P	P	P	P	P	P	P	P	P	P
1428739_at	806	1173	3957	7949	5489	606	1635	996	582	1742	680	374	985		2310040A07Rik	RIKEN cDNA 2310040A07 gene	P	P	P	P	P	P	P	P	P	P	P	P	P
1449197_at	456	755	372	657	903	290	205	474	284	330	266	476	488		2310040A13Rik	RIKEN cDNA 2310040A13 gene	P	P	P	P	P	P	P	P	P	P	P	P	P
1451220_at	1202	1598	1316	1128	1450	477	542	328	513	817	903	1591	717		2310040A13Rik	RIKEN cDNA 2310040A13 gene	P	P	P	P	P	P	P	P	P	P	P	P	P
1448543_at	1624	1093	1519	1633	2005	1251	1418	941	981	992	1466	1377	1084		2310042G06Rik	RIKEN cDNA 2310042G06 gene	P	P	P	P	P	P	P	P	P	P	P	P	P
1428261_at	195	337	422	440	562	160	226	325	258	1212	1097	563	281		2310042L06Rik	RIKEN cDNA 2310042L06 gene	P	P	P	P	P	P	P	P	P	P	P	P	P
1428083_at	1098	902	380	451	847	16	26	11	108	113	269	364	73		2310043N10Rik	RIKEN cDNA 2310043N10 gene	P	P	P	P	P	A	A	A	A	A	P	P	A
1419170_at	2355	1447	2190	2124	2144	1863	1675	3379	2797	1844	3606	5386	3422		2310044D20Rik	RIKEN cDNA 2310044D20 gene	P	P	P	P	P	P	P	P	P	P	P	P	P
1419171_at	98	64	181	132	125	221	140	198	187	135	235	441	408		2310044D20Rik	RIKEN cDNA 2310044D20 gene	P	P	P	P	A	P	P	P	P	P	P	P	P
1424038_a_at	6340	3891	6834	8035	4193	4451	4921	5182	5285	8046	8049	10935	2837		2310044H10Rik	RIKEN cDNA 2310044H10 gene	P	P	P	P	P	P	P	P	P	P	P	P	P
1452227_at	546	501	977	771	424	1366	1785	1836	1645	967	224	62	940		2310045A20Rik	RIKEN cDNA 2310045A20 gene	P	P	P	P	P	P	P	P	P	P	A	A	P
1429079_a_at	286	237	302	283	285	150	236	242	237	164	246	305	213		2310045N01Rik	RIKEN cDNA 2310045N01 gene	P	P	A	P	A	P	A	P	A	A	P	A	A
1453059_at	69	84	80	80	41	781	1075	1109	659	101	31	56	952		2310046A06Rik /// 2810047F03Rik	RIKEN cDNA 2310046A06 gene /// RIKEN cDNA 2810047F03 gene	A	P	P	A	A	P	P	P	P	A	A	A	P
1429292_a_at	52	75	42	39	116	58	114	135	792	45	145	124	201		2310046K01Rik	RIKEN cDNA 2310046K01 gene	A	A	A	A	P	A	A	P	P	A	A	A	P
1439784_at	297	111	263	144	150	366	304	350	377	410	349	186	166		2310046O06Rik	RIKEN cDNA 2310046O06 gene	P	A	P	P	P	P	P	P	P	P	P	P	P
1428431_at	7526	4723	5169	9189	7295	87	282	210	467	11102	3117	3028	1201		2310047A01Rik	RIKEN cDNA 2310047A01 gene	P	P	P	P	P	A	P	P	P	P	P	P	P
1428432_at	1345	964	1471	1203	1533	16	71	5	93	1641	602	552	183		2310047A01Rik	RIKEN cDNA 2310047A01 gene	P	P	P	P	P	A	A	A	A	P	P	P	P
1452201_at	88	183	351	236	242	90	364	318	207	183	177	118	305		2310047B19Rik	RIKEN cDNA 2310047B19 gene	A	P	P	P	P	P	P	P	P	P	P	P	P
1444058_at	287	181	289	372	287	596	424	374	527	390	444	169	559		2310047C04Rik	RIKEN cDNA 2310047C04 gene	P	P	P	P	P	P	P	P	P	P	P	P	P
1454878_at	1114	1698	1616	787	1062	3954	2224	2822	1725	1693	1338	617	2755		2310047C04Rik	RIKEN cDNA 2310047C04 gene	P	P	P	P	P	P	P	P	P	P	P	P	P
1458439_a_at	429	694	619	619	401	1406	858	655	885	613	765	259	1053		2310047C04Rik	RIKEN cDNA 2310047C04 gene	P	P	P	P	P	P	P	P	P	P	P	P	P
1435076_at	217	176	222	137	95	204	423	213	489	818	3163	7451	283		2310047D13Rik	RIKEN cDNA 2310047D13 gene	P	P	P	P	A	P	P	P	P	P	P	P	P
1428256_at	6609	5238	7829	9505	9323	4811	4880	4962	5626	8664	5697	5246	4463		2310047H23Rik	RIKEN cDNA 2310047H23 gene	P	P	P	P	P	P	P	P	P	P	P	P	P
1428990_at	107	334	277	232	313	381	279	237	184	433	261	181	244		2310047K21Rik	RIKEN cDNA 2310047K21 gene	P	P	P	P	P	P	P	P	P	P	P	P	P
1428723_at	731	291	555	637	509	480	522	558	486	678	267	547	306		2310047M10Rik	RIKEN cDNA 2310047M10 gene	P	P	P	P	P	P	P	P	P	P	P	P	P
1435431_at	346	417	593	508	309	217	565	258	356	472	448	425	224		2310047M15Rik	RIKEN cDNA 2310047M15 gene	P	P	P	P	P	P	P	P	P	P	P	P	P
1418963_at	2210	816	826	1048	1164	1358	1500	1383	1189	844	992	1207	1027		2310047O13Rik	RIKEN cDNA 2310047O13 gene	P	P	P	P	P	P	P	P	P	P	P	P	P
1435636_at	527	324	202	354	402	682	322	477	592	263	157	81	346		2310051F07Rik	RIKEN cDNA 2310051F07 gene	P	P	P	P	P	P	P	P	P	P	A	A	P
1455389_s_at	1444	1028	555	901	1260	1575	1035	1794	1374	1111	647	335	1887		2310051F07Rik	RIKEN cDNA 2310051F07 gene	P	P	P	P	P	P	P	P	P	P	P	P	P
1428524_at	291	325	446	245	214	349	563	324	301	505	314	226	185		2310051N18Rik	RIKEN cDNA 2310051N18 gene	P	P	P	P	P	P	P	P	P	P	P	P	P
1454186_a_at	98	71	126	86	74	70	194	139	117	128	87	46	93		2310051N18Rik	RIKEN cDNA 2310051N18 gene	A	P	A	A	A	A	A	P	A	A	A	A	A
1451385_at	2336	1236	2753	3689	2657	854	1770	1594	1567	1787	2171	1417	1550		2310056P07Rik	RIKEN cDNA 2310056P07 gene	P	P	P	P	P	P	P	P	P	P	P	P	P
1423705_at	489	482	722	734	668	1613	1090	863	958	714	1859	3347	854		2310057D15Rik	RIKEN cDNA 2310057D15 gene	P	P	P	P	P	P	P	P	P	P	P	P	P
1437327_x_at	1547	1939	1914	2110	1830	6255	3453	3899	3294	1817	6180	10033	3615		2310057D15Rik	RIKEN cDNA 2310057D15 gene	P	P	P	P	P	P	P	P	P	P	P	P	P
1432464_a_at	47	54	129	116	122	660	985	433	396	432	162	41	208		2310057J16Rik	RIKEN cDNA 2310057J16 gene	A	A	P	A	A	P	P	P	P	P	P	A	P
1429508_at	840	269	266	377	502	833	924	1198	1030	345	435	504	1357		2310057M21Rik	RIKEN cDNA 2310057M21 gene	P	P	P	P	P	P	P	P	P	P	P	P	P
1429215_at	54	329	97	98	59	525	353	404	429	243	135	118	370		2310058N22Rik	RIKEN cDNA 2310058N22 gene	A	P	P	P	A	P	P	P	P	P	P	P	P
1457956_at	80	179	86	58	141	28	31	71	34	225	126	38	23		2310058O09Rik	RIKEN cDNA 2310058O09 gene	A	A	A	A	A	A	A	A	A	P	A	A	A
1427921_s_at	433	136	408	331	502	102	211	325	343	403	388	286	305		2310061C15Rik	RIKEN cDNA 2310061C15 gene	P	P	P	P	P	A	P	P	P	P	P	P	P
1427922_at	203	127	187	123	233	203	191	289	222	235	193	166	216		2310061C15Rik	RIKEN cDNA 2310061C15 gene	P	A	P	P	P	P	P	P	P	P	P	P	P
1452597_at	2475	929	1258	1668	1775	374	583	936	1320	1472	1722	1493	1453		2310061C15Rik	RIKEN cDNA 2310061C15 gene	P	P	P	P	P	P	P	P	P	P	P	P	P
1428350_at	301	303	374	226	222	391	735	378	318	457	373	262	221		2310061F22Rik	RIKEN cDNA 2310061F22 gene	P	P	P	A	A	P	P	P	P	P	A	A	A
1439387_x_at	1043	5577	2164	1146	1615	3778	2670	1126	1313	1395	2010	1552	2187		2310061F22Rik	RIKEN cDNA 2310061F22 gene	P	P	P	P	P	P	P	P	P	P	P	P	P
1434155_a_at	2511	1028	1848	2475	3069	2785	3517	3293	4253	3203	1728	1312	2263		2310061I04Rik	RIKEN cDNA 2310061I04 gene	P	P	P	P	P	P	P	P	P	P	P	P	P
1437985_a_at	1645	991	1369	1512	1620	2204	2355	3743	2647	1704	1434	1272	1744		2310061I04Rik	RIKEN cDNA 2310061I04 gene	P	P	P	P	P	P	P	P	P	P	P	P	P
1451265_at	387	346	471	309	359	517	832	564	600	792	805	570	497		2310061I09Rik	RIKEN cDNA 2310061I09 gene	P	P	P	P	P	P	P	P	P	P	P	P	P
1449304_at	606	265	352	430	349	232	295	597	638	361	502	582	308		2310061J03Rik	RIKEN cDNA 2310061J03 gene	P	A	P	P	A	P	P	P	P	P	P	A	P
1417243_at	1619	1509	1790	1821	2081	1559	1795	1655	1476	2257	2142	1957	1865		2310065K24Rik	RIKEN cDNA 2310065K24 gene	P	P	P	P	P	P	P	P	P	P	P	P	P
1424239_at	381	309	262	321	210	580	785	831	1105	361	153	110	340		2310066E14Rik	RIKEN cDNA 2310066E14 gene	P	P	P	P	P	P	P	P	P	P	P	P	P
1435399_at	1614	172	160	259	450	30	50	85	55	37	28	17	114		2310068J10Rik	RIKEN cDNA 2310068J10 gene	P	P	P	P	P	A	P	P	P	A	A	A	P
1428534_at	919	1196	1179	556	510	541	560	803	470	333	302	302	425		2310073E15Rik	RIKEN cDNA 2310073E15 gene	P	P	P	P	P	P	P	P	P	P	P	P	P
1442077_at	99	29	12	51	23	1142	628	492	423	31	27	10	1126		2310076G05Rik	RIKEN cDNA 2310076G05 gene	P	A	A	A	A	P	P	P	P	A	A	A	P
1429505_at	883	790	465	643	678	536	216	208	452	469	506	475	284		2310076G13Rik	RIKEN cDNA 2310076G13 gene	P	P	P	P	P	P	P	P	P	P	P	P	P
1453174_at	981	1315	662	668	1111	520	287	390	592	374	441	437	609		2310076G13Rik	RIKEN cDNA 2310076G13 gene	P	P	P	P	P	P	P	P	P	P	P	P	P
1460536_at	154	362	83	175	367	93	85	182	111	282	605	103	130		2310079F09Rik	RIKEN cDNA 2310079F09 gene	P	P	P	P	P	P	P	P	P	P	P	P	P
1417779_at	775	276	754	985	1009	920	851	1115	895	757	523	888	1135		2310079N02Rik	RIKEN cDNA 2310079N02 gene	P	P	P	P	P	P	P	P	P	P	P	P	P
1428899_at	48	49	55	41	15	53	48	59	54	16	493	653	73		2310079P10Rik	RIKEN cDNA 2310079P10 gene	A	A	A	A	A	A	A	A	A	A	P	P	A
1434124_x_at	4556	4966	5896	8916	5451	1496	2232	2232	2452	4529	5027	6478	3148		2400001E08Rik	RIKEN cDNA 2400001E08 gene	P	P	P	P	P	P	P	P	P	P	P	P	P
1448718_at	712	330	930	764	590	293	539	497	438	902	973	990	462		2400001E08Rik	RIKEN cDNA 2400001E08 gene	P	P	P	P	P	P	P	P	P	P	P	P	P
1417463_a_at	13469	10881	10473	13500	11416	5694	5917	6506	6769	10472	15455	19248	8021		2400001E08Rik /// LOC433216	RIKEN cDNA 2400001E08 gene /// hypothetical LOC433216	P	P	P	P	P	P	P	P	P	P	P	P	P
1451058_at	344	300	374	286	417	273	590	751	526	422	652	688	658		2400002F11Rik	RIKEN cDNA 2400002F11 gene	P	P	P	P	P	P	P	P	P	P	P	P	P
1423837_at	820	1001	839	995	1373	718	940	924	771	1343	1192	1580	884		2400003C14Rik	RIKEN cDNA 2400003C14 gene	P	P	P	P	P	P	P	P	P	P	P	P	P
1423838_s_at	3858	3298	3545	4595	4423	3659	3839	3548	3325	5570	5414	6819	2757		2400003C14Rik	RIKEN cDNA 2400003C14 gene	P	P	P	P	P	P	P	P	P	P	P	P	P
1427896_at	1958	1611	2183	1770	1416	1772	2187	1680	1905	2230	1368	719	1524		2400003N08Rik	RIKEN cDNA 2400003N08 gene	P	P	P	P	P	P	P	P	P	P	P	P	P
1427897_s_at	852	662	727	746	606	586	748	1100	700	874	569	561	893		2400003N08Rik	RIKEN cDNA 2400003N08 gene	P	P	P	P	P	P	P	P	P	P	P	P	P
1448740_at	671	932	971	910	842	463	639	472	463	676	577	345	552		2400006H24Rik	RIKEN cDNA 2400006H24 gene	P	P	P	P	P	P	P	P	P	P	P	P	P
1428828_at	576	336	492	510	354	346	402	514	412	656	468	415	408		2400006N03Rik	RIKEN cDNA 2400006N03 gene	P	P	P	P	A	P	P	P	P	P	P	P	P
1441814_s_at	543	461	652	423	468	586	605	724	425	545	417	458	518		2400006N03Rik	RIKEN cDNA 2400006N03 gene	P	P	P	P	P	P	P	P	P	P	P	P	P
1439834_at	75	73	48	57	40	66	130	149	100	57	182	215	131		2400009B08Rik	RIKEN cDNA 2400009B08 gene	P	A	P	P	A	P	P	P	P	A	P	P	P
1424259_at	331	118	1027	864	736	132	273	279	244	923	1854	2792	168		2400010G15Rik	RIKEN cDNA 2400010G15 gene	P	P	P	P	P	P	P	P	P	P	P	P	P
1424564_at	1244	885	921	991	1002	1162	1685	2082	1150	1403	1141	1240	999		2410001C21Rik	RIKEN cDNA 2410001C21 gene	P	P	P	P	P	P	P	P	P	P	P	P	P
1460362_at	937	472	1012	721	650	532	976	781	696	924	1008	1047	611		2410001C21Rik	RIKEN cDNA 2410001C21 gene	P	P	P	P	P	P	P	P	P	P	P	P	P
1460672_at	469	830	996	467	540	1550	1942	1100	980	1254	1102	656	620		2410002F23Rik	RIKEN cDNA 2410002F23 gene	P	P	P	P	P	P	P	P	P	P	P	P	P
1418667_at	510	311	390	418	481	246	254	210	241	394	470	555	676		2410002O22Rik	RIKEN cDNA 2410002O22 gene	P	P	P	P	P	P	P	P	P	P	P	P	P
1435377_at	1543	1504	1239	1534	1886	950	1183	1083	990	1461	1976	1701	1435		2410002O22Rik	RIKEN cDNA 2410002O22 gene	P	P	P	P	P	P	P	P	P	P	P	P	P
1453332_at	123	433	185	131	149	408	284	256	185	336	217	176	211		2410002O22Rik	RIKEN cDNA 2410002O22 gene	P	P	P	P	P	P	P	P	P	P	P	P	P
1428213_at	1216	1503	1566	1195	1162	569	1196	792	1117	1900	1025	945	968		2410003A14Rik	RIKEN cDNA 2410003A14 gene	P	P	P	P	P	P	P	P	P	P	P	P	P
1439461_x_at	269	387	184	232	247	320	188	601	237	178	214	244	314		2410003A14Rik	RIKEN cDNA 2410003A14 gene	P	P	P	P	P	P	P	P	P	P	P	P	P
1428495_at	568	376	568	612	720	392	557	416	390	509	429	462	256		2410003K15Rik	RIKEN cDNA 2410003K15 gene	P	P	P	P	P	P	P	P	P	P	P	P	P
1416436_a_at	520	338	537	565	672	428	356	501	379	432	325	257	382		2410003P15Rik	RIKEN cDNA 2410003P15 gene	P	A	P	P	P	P	P	P	P	P	P	A	P
1448337_at	744	472	595	655	780	473	509	907	770	578	447	277	672		2410003P15Rik	RIKEN cDNA 2410003P15 gene	P	P	P	P	P	P	P	P	P	P	P	P	P
1419174_at	2319	3965	3393	3323	3227	6038	4546	3737	3205	3519	4571	3772	4065		2410004B18Rik	RIKEN cDNA 2410004B18 gene	P	P	P	P	P	P	P	P	P	P	P	P	P
1418719_at	254	178	185	113	124	300	397	165	150	350	253	400	139		2410004L22Rik	RIKEN cDNA 2410004L22 gene	P	P	P	A	A	P	P	P	A	P	P	P	P
1416323_at	227	381	522	259	257	441	647	436	583	605	407	313	395		2410004N11Rik	RIKEN cDNA 2410004N11 gene	P	P	P	P	P	P	P	P	P	P	P	P	P
1416324_s_at	338	561	792	586	432	815	849	704	946	1261	646	479	498		2410004N11Rik	RIKEN cDNA 2410004N11 gene	P	P	P	P	P	P	P	P	P	P	P	P	P
1448302_at	423	350	241	180	275	501	573	377	608	344	473	314	363		2410004N11Rik	RIKEN cDNA 2410004N11 gene	P	P	P	P	A	P	P	P	P	P	P	P	P
1424490_at	671	319	830	410	381	300	1199	738	529	770	394	177	276		2410005H09Rik	RIKEN cDNA 2410005H09 gene	P	P	P	P	P	P	P	P	P	P	P	P	P
1418658_at	382	263	526	708	901	264	338	347	299	408	444	479	290		2410005O16Rik	RIKEN cDNA 2410005O16 gene	P	P	P	P	P	P	P	P	P	P	P	P	P
1438034_at	70	188	112	126	207	145	65	149	108	275	151	98	107		2410005O16Rik	RIKEN cDNA 2410005O16 gene	P	P	P	P	P	P	P	P	P	P	P	P	P
1457999_at	314	519	437	739	803	232	222	93	132	455	274	342	314		2410005O16Rik	RIKEN cDNA 2410005O16 gene	P	P	P	P	P	P	A	P	A	P	P	P	P
1447936_at	1387	1117	1548	956	784	1160	1949	924	1176	1910	1942	1643	575		2410006H16Rik	RIKEN cDNA 2410006H16 gene	P	P	P	P	P	P	P	P	P	P	P	P	P
1452847_at	1074	675	780	1012	1215	87	202	185	701	62	39	67	252		2410008K03Rik	RIKEN cDNA 2410008K03 gene	P	P	P	P	P	A	A	P	P	A	A	A	A
1428515_at	214	126	214	256	241	118	228	268	243	238	223	182	200		2410012H22Rik	RIKEN cDNA 2410012H22 gene	P	P	P	P	P	P	P	P	P	P	P	P	P
1436508_at	843	341	411	263	193	721	612	500	484	400	450	276	608		2410014A08Rik	RIKEN cDNA 2410014A08 gene	P	P	P	P	P	P	P	P	P	P	P	P	P
1436509_at	1634	403	617	523	504	575	542	611	596	1073	698	291	519		2410014A08Rik	RIKEN cDNA 2410014A08 gene	P	P	P	P	P	P	P	P	P	P	P	P	P
1451692_at	112	178	133	96	112	166	112	123	157	164	208	266	89		2410015B03Rik	RIKEN cDNA 2410015B03 gene	A	A	P	A	A	A	A	A	A	P	P	P	A
1427909_at	3517	1346	3724	4304	3193	1478	2687	2791	3004	1996	2957	3030	3282		2410015M20Rik	RIKEN cDNA 2410015M20 gene	P	P	P	P	P	P	P	P	P	P	P	P	P
1416439_at	389	756	518	349	285	514	877	654	568	704	553	402	572		2410015N17Rik	RIKEN cDNA 2410015N17 gene	P	P	P	P	P	P	P	P	P	P	P	P	P
1420626_at	1044	944	1105	1194	1253	809	675	580	675	1017	1495	1577	780		2410016F19Rik	RIKEN cDNA 2410016F19 gene	P	P	P	P	P	P	P	P	P	P	P	P	P
1448413_at	248	305	256	161	158	546	640	762	612	578	211	163	721		2410016O06Rik	RIKEN cDNA 2410016O06 gene	P	A	P	P	A	P	P	P	P	P	P	P	P
1454047_a_at	322	257	249	187	235	250	247	239	247	355	218	365	214		2410017P07Rik	RIKEN cDNA 2410017P07 gene	P	P	P	P	P	P	P	P	P	P	P	P	P
1455207_at	277	216	334	255	282	153	409	308	257	209	266	316	288		2410017P09Rik	RIKEN cDNA 2410017P09 gene	P	P	P	P	P	P	P	P	P	P	P	P	P
1451118_a_at	275	256	432	400	355	166	292	252	304	506	604	433	218		2410018C17Rik	RIKEN cDNA 2410018C17 gene	P	P	P	P	P	P	P	P	P	P	P	P	P
1417146_at	220	265	282	173	205	110	274	325	227	507	497	227	127		2410018C20Rik	RIKEN cDNA 2410018C20 gene	P	P	P	P	P	P	P	P	P	P	P	P	P
1452591_a_at	1186	2129	2171	1783	1480	945	1663	2143	1321	1940	1659	1455	1655		2410018G20Rik	RIKEN cDNA 2410018G20 gene	P	P	P	P	P	P	P	P	P	P	P	P	P
1429671_at	49	44	27	19	9	269	281	244	193	94	143	92	250		2410018M08Rik	RIKEN cDNA 2410018M08 gene	A	A	A	A	A	P	P	P	P	A	P	A	P
1454214_a_at	949	842	758	587	703	896	975	598	577	1693	761	398	661		2410019A14Rik	RIKEN cDNA 2410019A14 gene	P	P	P	P	P	P	P	P	P	P	P	P	P
1420113_s_at	808	988	1160	974	812	1064	1581	1447	1257	1484	849	583	1070		2410022L05Rik	RIKEN cDNA 2410022L05 gene	P	P	P	P	P	P	P	P	P	P	P	P	P
1448971_at	234	221	331	280	279	347	564	904	534	390	251	103	483		2410022L05Rik	RIKEN cDNA 2410022L05 gene	P	P	P	P	P	P	P	P	P	P	P	P	P
1453081_at	305	222	237	277	258	184	211	299	154	183	128	255	189		2410022M11Rik	RIKEN cDNA 2410022M11 gene	P	P	P	P	P	P	P	P	P	P	P	P	P
1424702_a_at	262	558	250	337	363	473	308	296	279	388	510	457	294		2410024A21Rik	RIKEN cDNA 2410024A21 gene	P	P	P	P	P	P	P	P	P	P	P	P	P
1452914_at	91	246	346	178	148	208	210	252	182	471	138	112	161		2410024N18Rik	RIKEN cDNA 2410024N18 gene	P	P	P	P	P	P	P	P	P	P	P	P	P
1428403_at	86	344	587	448	340	165	123	122	95	158	95	80	99		2410025L10Rik	RIKEN cDNA 2410025L10 gene	P	P	P	P	P	P	P	P	P	P	P	A	P
1428404_at	170	419	508	688	489	340	178	112	164	166	116	171	116		2410025L10Rik	RIKEN cDNA 2410025L10 gene	A	P	P	P	P	P	A	P	A	P	A	A	A
1439470_at	83	339	137	177	162	115	145	271	175	276	168	178	112		2410025L10Rik	RIKEN cDNA 2410025L10 gene	A	P	P	P	P	A	P	P	P	P	P	P	P
1426495_at	587	450	618	406	447	206	206	147	250	518	559	509	238		2410042D21Rik	RIKEN cDNA 2410042D21 gene	P	P	P	P	P	P	P	P	P	P	P	P	P
1433872_at	569	408	421	339	366	301	287	279	280	528	529	255	266		2410042D21Rik	RIKEN cDNA 2410042D21 gene	P	P	P	P	P	P	P	P	P	P	P	P	P
1425147_at	79	180	158	77	43	247	245	313	276	297	266	297	258		2410075B13Rik	RIKEN cDNA 2410075B13 gene	A	P	P	A	A	P	P	P	P	P	P	P	P
1428551_at	175	249	497	283	506	204	227	178	228	404	260	194	239		2410075D05Rik	RIKEN cDNA 2410075D05 gene	P	P	P	P	P	P	P	P	P	P	P	P	P
1437439_at	162	214	157	245	203	447	203	180	151	261	181	172	108		2410089E03Rik	RIKEN cDNA 2410089E03 gene	P	P	P	P	P	P	P	P	P	P	P	P	P
1452951_at	324	625	457	460	350	593	545	375	348	752	486	389	199		2410089E03Rik	RIKEN cDNA 2410089E03 gene	P	P	P	P	P	P	P	P	P	P	P	P	P
1427904_s_at	647	397	495	551	523	834	606	648	655	809	814	657	677		2410091C18Rik	RIKEN cDNA 2410091C18 gene	P	P	P	P	P	P	P	P	P	P	P	P	P
1416438_at	3195	2657	4257	3947	2211	2138	4403	3504	3885	6935	6663	6979	2553		2410104I19Rik	RIKEN cDNA 2410104I19 gene	P	P	P	P	P	P	P	P	P	P	P	P	P
1430705_at	64	568	394	175	132	267	294	138	175	523	646	575	81		2410104I19Rik	RIKEN cDNA 2410104I19 gene	A	P	P	P	A	P	A	P	A	P	P	P	A
1431046_at	58	100	98	72	86	1101	921	1079	783	352	211	395	690		2410127E16Rik	RIKEN cDNA 2410127E16 gene	A	A	A	A	A	P	P	P	P	P	P	P	P
1457072_at	19	176	101	53	40	1415	988	832	495	73	28	19	652		2410127E16Rik /// Bcl11a	RIKEN cDNA 2410127E16 gene /// B-cell CLL/lymphoma 11A (zinc finger protein)	A	P	P	A	A	P	P	P	P	A	A	A	P
1428771_at	92	94	123	116	79	188	215	113	163	189	115	88	100		2410127E18Rik	RIKEN cDNA 2410127E18 gene	P	P	P	P	P	P	P	P	P	P	P	P	P
1433997_at	2538	3201	3822	4614	3366	6198	5590	4347	4219	5421	2231	1466	3951		2410127E18Rik	RIKEN cDNA 2410127E18 gene	P	P	P	P	P	P	P	P	P	P	P	P	P
1437552_at	349	417	368	178	376	121	89	169	157	492	311	163	203		2410127L17Rik /// LOC624038 /// LOC626107 /// LOC665401 /// LOC665714 /// LOC666456 /// LOC677519 /// LOC677553	RIKEN cDNA 2410127L17 gene /// similar to RIKEN cDNA 2410127L17 /// similar to RIKEN cDNA 2410127L17 /// hypothetical protein LOC665401 /// hypothetical protein LOC665714 /// similar to CG11596-PA, isoform A /// similar to CG11596-PA, isoform A /// similar to RIKEN cDNA 2410127L17 gene	P	P	P	P	P	P	P	P	P	P	P	P	P
1429458_at	1821	1936	1715	1920	2656	865	489	886	1000	3657	2262	1210	2275		2410127L17Rik /// LOC626107 /// LOC666456 /// LOC677519 /// LOC677553	RIKEN cDNA 2410127L17 gene /// similar to RIKEN cDNA 2410127L17 /// similar to CG11596-PA, isoform A /// similar to CG11596-PA, isoform A /// similar to RIKEN cDNA 2410127L17 gene	P	P	P	P	P	P	P	P	P	P	P	P	P
1434663_at	361	423	437	202	393	483	341	737	550	358	394	294	735		2410129H14Rik	RIKEN cDNA 2410129H14 gene	P	P	P	P	P	P	P	P	P	P	P	P	P
1434664_at	190	128	146	99	175	201	157	217	203	283	522	597	339		2410129H14Rik	RIKEN cDNA 2410129H14 gene	P	P	P	P	P	P	P	P	P	A	P	P	P
1455052_a_at	1715	2834	2229	1364	1631	2034	1905	2248	2182	1840	2058	1522	3168		2410129H14Rik	RIKEN cDNA 2410129H14 gene	P	P	P	P	P	P	P	P	P	P	P	P	P
1455935_at	307	226	312	447	320	472	489	253	262	673	549	410	218		2410131K14Rik	RIKEN cDNA 2410131K14 gene	P	P	P	P	P	P	P	P	P	P	P	P	P
1420058_s_at	1822	2055	2162	1806	1838	1162	1422	1029	921	1115	1051	1056	1038		2410166I05Rik	RIKEN cDNA 2410166I05 gene	P	P	P	P	P	P	P	P	P	P	P	P	P
1426374_at	2211	1927	2260	2486	2634	856	1249	1062	1046	1287	1341	1673	932		2410166I05Rik	RIKEN cDNA 2410166I05 gene	P	P	P	P	P	P	P	P	P	P	P	P	P
1434144_s_at	483	365	546	886	914	133	219	436	347	424	278	276	292		2410187C16Rik	RIKEN cDNA 2410187C16 gene	P	P	P	P	P	P	P	P	P	P	P	P	P
1436302_at	650	386	253	297	518	166	173	163	264	305	786	1111	328		2410193C02Rik	RIKEN cDNA 2410193C02 gene	P	P	P	P	P	P	P	P	P	P	P	P	P
1452093_at	1330	435	922	1256	1554	568	584	1012	1044	692	474	566	846		2500001K11Rik	RIKEN cDNA 2500001K11 gene	P	P	P	P	P	P	P	P	P	P	P	P	P
1429541_at	300	342	318	243	238	151	287	428	310	183	213	217	167		2500002G23Rik	RIKEN cDNA 2500002G23 gene	P	P	P	P	P	P	P	P	P	P	P	P	P
1423729_a_at	9842	3065	4587	6554	5030	3613	3691	3885	3810	4106	5583	9180	4840		2500002L14Rik	RIKEN cDNA 2500002L14 gene	P	P	P	P	P	P	P	P	P	P	P	P	P
1423408_a_at	3914	5461	6042	4017	4720	7464	4858	5885	4611	7411	8653	6257	5657		2500003M10Rik	RIKEN cDNA 2500003M10 gene	P	P	P	P	P	P	P	P	P	P	P	P	P
1423409_a_at	1107	1966	2627	1435	1653	906	1215	818	1225	3072	3325	1779	1428		2500003M10Rik	RIKEN cDNA 2500003M10 gene	P	P	P	P	P	P	P	P	P	P	P	P	P
1457675_at	112	136	141	106	95	139	219	249	183	149	100	77	155		2510002D24Rik	RIKEN cDNA 2510002D24 gene	P	P	P	P	P	P	P	P	P	P	P	A	P
1452874_at	8213	5619	5999	8311	7195	6313	5874	6889	6427	4681	12064	11105	9693		2510003E04Rik	RIKEN cDNA 2510003E04 gene	P	P	P	P	P	P	P	P	P	P	P	P	P
1418386_at	477	148	427	360	387	418	792	668	475	864	1054	455	454		2510005D08Rik	RIKEN cDNA 2510005D08 gene	P	P	P	P	P	P	P	P	P	P	P	P	P
1435270_x_at	263	17	252	312	279	229	404	482	169	350	466	300	142		2510005D08Rik	RIKEN cDNA 2510005D08 gene	P	A	P	P	P	P	P	P	P	P	P	P	A
1449072_a_at	622	171	762	653	634	770	1178	1040	596	1400	1558	680	825		2510005D08Rik	RIKEN cDNA 2510005D08 gene	P	P	P	P	P	P	P	P	P	P	P	P	P
1419074_at	627	442	500	535	996	672	617	1165	833	417	675	1095	1320		2510006C20Rik	RIKEN cDNA 2510006C20 gene	P	P	P	P	P	P	P	P	P	P	P	P	P
1425054_a_at	1271	817	1126	914	969	844	1379	1237	1010	1340	1516	2052	1205		2510006D16Rik	RIKEN cDNA 2510006D16 gene	P	P	P	P	P	P	P	P	P	P	P	P	P
1428097_at	1140	5603	3824	3345	2779	1732	1579	1510	1458	3302	2673	3224	2492		2510009E07Rik	RIKEN cDNA 2510009E07 gene	P	P	P	P	P	P	P	P	P	P	P	P	P
1452760_at	1084	577	944	934	928	545	926	689	1094	1162	618	651	773		2510012J08Rik	RIKEN cDNA 2510012J08 gene	P	P	P	P	P	P	P	P	P	P	P	P	P
1429245_at	100	63	179	112	107	79	139	119	164	208	182	110	70		2510022D24Rik	RIKEN cDNA 2510022D24 gene	P	A	P	P	P	P	A	P	P	P	A	A	A
1438646_x_at	801	714	458	405	692	659	447	732	542	608	935	1136	668		2510039O18Rik	RIKEN cDNA 2510039O18 gene	P	P	P	P	P	P	P	P	P	P	P	P	P
1451078_at	261	107	208	158	183	271	216	286	281	334	327	431	193		2510039O18Rik	RIKEN cDNA 2510039O18 gene	P	P	P	P	P	P	P	P	P	P	P	P	P
1423672_at	2100	706	714	648	807	708	575	918	516	569	257	477	1100		2510042P03Rik	RIKEN cDNA 2510042P03 gene	P	P	P	P	P	P	P	P	P	P	P	P	P
1416979_at	3120	2102	2723	2101	2029	1498	2985	2539	3147	2386	2584	2674	2719		2510048O06Rik	RIKEN cDNA 2510048O06 gene	P	P	P	P	P	P	P	P	P	P	P	P	P
1423216_a_at	2396	1338	1421	1509	1616	1525	1608	1733	1575	1030	804	682	1643		2510049I19Rik	RIKEN cDNA 2510049I19 gene	P	P	P	P	P	P	P	P	P	P	P	P	P
1423217_a_at	4707	2808	3216	2058	1926	4489	4764	2328	2759	3509	2775	2426	3496		2510049I19Rik	RIKEN cDNA 2510049I19 gene	P	P	P	P	P	P	P	P	P	P	P	P	P
1429509_at	194	149	188	115	212	229	270	228	173	203	200	171	150		2600001B17Rik	RIKEN cDNA 2600001B17 gene	P	P	P	P	P	P	P	P	P	P	P	P	P
1429126_at	399	459	443	323	402	283	211	380	346	886	685	645	262		2600001M11Rik	RIKEN cDNA 2600001M11 gene	P	P	P	P	A	P	A	P	P	P	P	P	A
1429967_at	55	552	137	142	285	206	111	95	97	257	171	65	122		2600002B07Rik	RIKEN cDNA 2600002B07 gene	A	P	P	P	A	P	A	A	A	P	A	A	A
1436729_at	2156	1086	1303	2443	2343	4960	3126	1250	1454	2341	1480	1496	888		2600003E23Rik	RIKEN cDNA 2600003E23 gene	P	P	P	P	P	P	P	P	P	P	P	P	P
1452119_at	102	254	238	123	139	115	130	133	119	160	82	88	82		2600005C20Rik	RIKEN cDNA 2600005C20 gene	A	P	P	P	A	P	P	P	P	P	A	A	A
1456117_at	470	334	296	257	311	403	491	319	378	528	337	256	321		2600005C20Rik	RIKEN cDNA 2600005C20 gene	P	P	P	P	P	P	P	P	P	P	P	P	P
1452103_at	137	67	109	83	48	184	228	211	183	134	148	133	223		2600005N12Rik	RIKEN cDNA 2600005N12 gene	P	A	P	A	A	A	P	P	P	P	P	P	P
1434702_at	2018	1809	3580	3066	2321	599	1477	1383	1709	2869	4013	7030	1229		2600009E05Rik	RIKEN cDNA 2600009E05 gene	P	P	P	P	P	P	P	P	P	P	P	P	P
1435871_at	248	486	271	479	598	3345	2497	1815	1425	1029	3922	6048	1915		2600009P04Rik	RIKEN cDNA 2600009P04 gene	P	P	P	P	P	P	P	P	P	P	P	P	P
1455484_at	71	112	147	180	191	1782	1644	1212	1013	534	1528	2172	876		2600009P04Rik	RIKEN cDNA 2600009P04 gene	P	P	P	P	P	P	P	P	P	P	P	P	P
1444151_at	24	171	31	63	75	486	208	104	126	279	400	374	74		2600009P04Rik	RIKEN cDNA 2600009P04 gene	A	P	A	A	A	P	A	P	P	P	P	P	A
1452834_at	89	602	211	128	58	33	54	44	251	68	396	4609	217		2600010E01Rik	RIKEN cDNA 2600010E01 gene	P	P	P	P	A	A	A	A	P	A	P	P	P
1425523_at	652	831	970	845	792	1466	847	651	1039	1231	1144	736	666		2600011C06Rik	RIKEN cDNA 2600011C06 gene	P	P	P	P	P	P	P	P	P	P	P	P	P
1428907_at	570	1601	715	505	639	1651	887	637	689	1042	1028	706	779		2600011C06Rik	RIKEN cDNA 2600011C06 gene	P	P	P	P	P	P	P	P	P	P	P	P	P
1428908_at	252	716	414	252	406	369	303	484	378	460	418	260	222		2600011C06Rik	RIKEN cDNA 2600011C06 gene	P	P	P	P	P	P	P	P	P	P	P	P	P
1437862_at	194	826	378	385	530	449	160	166	216	385	684	678	203		2600011C06Rik	RIKEN cDNA 2600011C06 gene	P	P	P	P	P	P	P	P	P	P	P	P	P
1454051_at	10	188	493	634	517	211	239	282	235	419	148	139	125		2600011E07Rik	RIKEN cDNA 2600011E07 gene	A	A	P	P	P	P	P	P	P	P	A	A	A
1455487_at	1794	1166	2027	2245	2087	1005	1477	1487	1138	1777	1484	855	1071		2600014M03Rik	RIKEN cDNA 2600014M03 gene	P	P	P	P	P	P	P	P	P	P	P	P	P
1428552_at	5292	2751	2914	1799	2232	2525	2524	3231	2232	2744	3281	4470	2724		2610001J05Rik	RIKEN cDNA 2610001J05 gene	P	P	P	P	P	P	P	P	P	P	P	P	P
1437538_at	146	215	176	261	187	221	153	90	134	198	131	111	134		2610002F03Rik	RIKEN cDNA 2610002F03 gene	P	P	P	P	P	P	A	P	A	P	P	P	P
1431003_a_at	2026	980	1230	1320	1192	825	856	705	686	1463	822	589	777		2610002J02Rik	RIKEN cDNA 2610002J02 gene	P	P	P	P	P	P	P	P	P	P	P	P	P
1438154_x_at	1310	591	744	661	579	351	369	215	256	524	347	237	310		2610002J02Rik	RIKEN cDNA 2610002J02 gene	P	P	P	P	P	P	P	P	P	P	P	P	P
1456310_a_at	3310	2174	1927	1656	1522	1143	1258	1004	1015	2284	1406	959	1046		2610002J02Rik	RIKEN cDNA 2610002J02 gene	P	P	P	P	P	P	P	P	P	P	P	P	P
1428561_at	1581	1214	1510	1896	1950	1841	1584	3110	2427	2004	1154	891	2866		2610002J23Rik	RIKEN cDNA 2610002J23 gene	P	P	P	P	P	P	P	P	P	P	P	P	P
1419690_at	283	229	270	184	144	660	667	901	579	359	243	177	344		2610002M06Rik	RIKEN cDNA 2610002M06 gene	P	P	P	P	A	P	P	P	P	P	P	A	P
1424743_at	703	659	1085	723	554	460	599	798	670	1115	1245	883	607		2610003J06Rik	RIKEN cDNA 2610003J06 gene	P	P	P	P	P	P	P	P	P	P	P	P	P
1429040_at	556	820	939	572	801	861	869	466	517	574	595	524	420		2610005L07Rik	RIKEN cDNA 2610005L07 gene	P	P	P	P	P	P	P	P	P	P	P	P	P
1429041_at	297	490	660	650	646	1291	806	819	438	840	789	554	288		2610005L07Rik	RIKEN cDNA 2610005L07 gene	P	P	P	P	P	P	P	P	P	P	P	P	P
1429882_at	118	839	227	260	302	422	189	107	143	521	307	184	80		2610005L07Rik	RIKEN cDNA 2610005L07 gene	P	P	P	P	P	P	P	P	P	P	P	P	P
1452997_at	6114	14044	11263	10687	10643	9613	9814	4883	5220	9826	9404	8634	5100		2610005L07Rik	RIKEN cDNA 2610005L07 gene	P	P	P	P	P	P	P	P	P	P	P	P	P
1453589_a_at	150	178	333	201	252	280	320	153	111	269	294	207	130		2610005L07Rik	RIKEN cDNA 2610005L07 gene	P	P	P	P	P	P	P	P	P	P	P	P	P
1457673_at	167	159	163	222	467	167	130	255	158	265	223	110	105		2610005L07Rik	RIKEN cDNA 2610005L07 gene	P	P	P	P	P	P	P	P	P	P	P	P	P
1437717_x_at	755	7557	817	771	533	2267	2007	1061	922	2893	1752	1466	1174		2610005L07Rik /// A430108E01Rik /// LOC547150	RIKEN cDNA 2610005L07 gene /// RIKEN cDNA A430108E01 gene /// similar to p47 protein isoform a	P	P	P	P	P	P	P	P	P	P	P	P	P
1429281_at	400	270	481	516	537	749	591	645	477	1021	775	501	640		2610008E11Rik	RIKEN cDNA 2610008E11 gene	P	P	P	P	P	P	P	P	P	P	P	P	P
1428707_at	1332	1077	1549	1309	1202	1019	2379	2488	1735	1591	660	315	955		2610009E16Rik	RIKEN cDNA 2610009E16 gene	P	A	P	P	A	P	P	P	P	P	P	A	P
1428708_x_at	2007	1036	2149	1897	1930	1575	2894	3607	2261	2095	766	566	1250		2610009E16Rik	RIKEN cDNA 2610009E16 gene	P	P	P	P	P	P	P	P	P	P	P	P	P
1423823_at	614	870	712	602	656	512	709	664	547	807	992	482	710		2610012O22Rik	RIKEN cDNA 2610012O22 gene	P	P	P	P	P	P	P	P	P	P	P	A	P
1455135_at	619	523	852	867	713	2291	2533	1827	1987	1524	544	313	823		2610014I16Rik	RIKEN cDNA 2610014I16 gene	P	P	P	P	P	P	P	P	P	P	P	P	P
1435678_at	1637	5328	7129	14924	12717	1681	2237	1088	912	2396	878	1031	2650		2610017I09Rik	RIKEN cDNA 2610017I09 gene	P	P	P	P	P	P	P	P	P	P	P	P	P
1419033_at	56	102	18	5	18	347	223	333	257	22	9	23	385		2610018G03Rik	RIKEN cDNA 2610018G03 gene	A	P	A	A	A	P	P	P	P	A	A	A	P
1453061_at	359	293	353	418	537	600	471	932	757	536	339	446	633		2610018O07Rik	RIKEN cDNA 2610018O07 gene	P	P	P	P	P	P	P	P	P	P	P	P	P
1428188_at	275	261	387	266	266	217	294	355	246	418	232	226	187		2610019A05Rik	RIKEN cDNA 2610019A05 gene	P	P	P	P	P	P	P	P	P	P	P	P	P
1428357_at	624	62	77	153	147	281	411	247	1995	93	83	225	480		2610019F03Rik	RIKEN cDNA 2610019F03 gene	P	A	A	P	P	P	P	P	P	P	A	P	P
1418184_at	187	228	221	112	91	109	121	147	76	283	46	49	115		2610019I03Rik	RIKEN cDNA 2610019I03 gene	P	A	P	A	A	A	A	A	A	P	A	A	A
1429202_at	90	178	181	163	284	252	272	249	187	280	236	227	175		2610019N06Rik	RIKEN cDNA 2610019N06 gene	P	P	P	P	P	P	P	P	P	P	P	P	P
1428325_at	2123	1111	1873	1174	1197	387	586	600	834	2351	2167	1824	601		2610019P18Rik	RIKEN cDNA 2610019P18 gene	P	P	P	P	P	P	P	P	P	P	P	P	P
1452945_at	223	328	171	174	187	473	475	383	271	523	345	262	410		2610020C11Rik	RIKEN cDNA 2610020C11 gene	P	P	P	P	P	P	P	P	P	P	P	P	P
1430214_a_at	207	351	221	129	128	62	113	98	73	375	115	78	101		2610020H08Rik	RIKEN cDNA 2610020H08 gene	P	P	P	P	A	A	A	P	A	P	P	A	A
1436673_at	239	274	130	127	153	243	190	226	226	256	235	180	218		2610020H08Rik	RIKEN cDNA 2610020H08 gene	P	P	P	P	P	P	P	P	P	P	P	P	P
1435662_at	832	770	643	672	637	947	906	644	596	701	1376	2386	973		2610020O08Rik	RIKEN cDNA 2610020O08 gene	P	P	P	P	P	P	P	P	P	P	P	P	P
1435891_x_at	141	244	132	118	224	150	141	660	164	173	124	178	246		2610021A01Rik /// LOC668572	RIKEN cDNA 2610021A01 gene /// similar to zinc finger protein 347	P	P	P	P	P	P	P	P	P	P	P	P	P
1438786_a_at	165	485	144	118	200	230	175	516	238	156	115	171	385		2610021A01Rik /// LOC668572	RIKEN cDNA 2610021A01 gene /// similar to zinc finger protein 347	P	P	P	P	P	P	P	P	P	P	P	P	P
1428077_at	159	92	152	30	18	793	1168	1172	855	2902	12369	8688	908		2610024A01Rik	RIKEN cDNA 2610024A01 gene	A	A	P	A	A	P	P	P	P	P	P	P	P
1429556_at	2774	1920	1181	1546	1543	242	193	145	337	335	190	56	342		2610024B07Rik	RIKEN cDNA 2610024B07 gene	P	P	P	P	P	P	P	P	P	P	P	P	P
1434620_s_at	2422	3243	2049	1792	1649	6239	3783	3072	2836	2516	1660	1252	3491		2610024E20Rik	RIKEN cDNA 2610024E20 gene	P	P	P	P	P	P	P	P	P	P	P	P	P
1418222_at	387	545	669	622	677	642	849	666	580	879	764	492	438		2610024G14Rik	RIKEN cDNA 2610024G14 gene	P	P	P	P	P	P	P	P	P	P	P	P	P
1454933_at	548	209	506	296	260	45	532	17	1285	80	15	28	144		2610027C15Rik	RIKEN cDNA 2610027C15 gene	P	P	P	P	P	A	A	P	P	A	A	A	A
1451039_at	1092	680	959	469	526	565	781	513	503	1070	931	846	381		2610027L16Rik	RIKEN cDNA 2610027L16 gene	P	P	P	P	P	P	P	P	P	P	P	P	P
1421089_a_at	272	261	284	185	221	113	184	183	121	198	261	234	202		2610028A01Rik	RIKEN cDNA 2610028A01 gene	P	P	P	P	P	P	P	P	P	P	P	P	P
1426289_at	1036	1059	917	591	867	1114	1236	1090	914	1752	1209	1188	1077		2610028H07Rik	RIKEN cDNA 2610028H07 gene	P	P	P	P	P	P	P	P	P	P	P	P	P
1457746_at	39	827	129	106	97	207	116	90	101	274	235	152	44		2610028H07Rik	RIKEN cDNA 2610028H07 gene	A	P	P	P	P	P	A	P	P	P	P	P	A
1417921_at	1273	1054	1062	617	629	498	882	932	809	971	1055	950	663		2610029G23Rik	RIKEN cDNA 2610029G23 gene	P	P	P	P	P	P	P	P	P	P	P	P	P
1428897_at	461	105	344	373	401	421	708	709	679	1264	923	771	722		2610029I01Rik	RIKEN cDNA 2610029I01 gene	P	P	P	P	P	P	P	P	P	P	P	P	P
1427937_at	567	450	474	359	414	547	388	800	539	397	613	785	632		2610030H06Rik	RIKEN cDNA 2610030H06 gene	P	P	P	P	P	P	P	P	P	P	P	P	P
1434232_a_at	2671	3276	2120	2960	2493	2595	1758	1416	1401	2896	5410	7321	2509		2610030H06Rik	RIKEN cDNA 2610030H06 gene	P	P	P	P	P	P	P	P	P	P	P	P	P
1434233_at	842	647	734	844	857	688	609	478	496	1416	2177	2950	663		2610030H06Rik	RIKEN cDNA 2610030H06 gene	P	P	P	P	P	P	P	P	P	P	P	P	P
1452607_at	2477	1595	1405	1129	1160	1394	1310	2652	2188	1526	1724	1961	2166		2610030H06Rik	RIKEN cDNA 2610030H06 gene	P	P	P	P	P	P	P	P	P	P	P	P	P
1423991_at	420	377	390	357	373	325	470	362	416	367	326	253	272		2610033H07Rik	RIKEN cDNA 2610033H07 gene	P	P	P	P	P	P	P	P	P	P	P	P	P
1428450_at	1209	311	727	651	550	110	236	274	315	661	520	559	262		2610034B18Rik	RIKEN cDNA 2610034B18 gene	P	P	P	P	P	P	P	P	P	P	P	P	P
1425408_a_at	35	442	692	946	1486	31	7	26	18	12	18	19	100		2610034M16Rik	RIKEN cDNA 2610034M16 gene	A	P	P	P	P	P	A	A	A	A	A	A	P
1453261_at	201	225	267	312	224	112	174	297	255	934	1408	835	182		2610035D17Rik	RIKEN cDNA 2610035D17 gene	P	P	P	P	P	P	P	P	P	P	P	P	P
1458706_at	59	177	49	101	88	54	67	68	45	256	519	210	100		2610035D17Rik	RIKEN cDNA 2610035D17 gene	A	P	A	A	A	P	A	A	A	P	P	P	P
1427080_at	567	320	521	439	549	304	359	411	453	696	433	560	343		2610036D13Rik	RIKEN cDNA 2610036D13 gene	P	P	P	P	P	P	P	P	P	P	P	P	P
1453053_at	70	153	64	43	74	247	278	184	104	142	58	29	183		2610036L11Rik	RIKEN cDNA 2610036L11 gene	P	P	P	P	P	P	P	P	P	P	A	A	P
1428483_a_at	244	349	308	109	221	250	238	272	208	280	148	141	142		2610039C10Rik	RIKEN cDNA 2610039C10 gene	P	P	P	P	P	P	P	P	P	P	P	P	P
1453314_x_at	754	1005	904	401	406	905	796	682	746	954	525	317	421		2610039C10Rik	RIKEN cDNA 2610039C10 gene	P	P	P	P	P	P	P	P	P	P	P	P	P
1428338_at	51	9	33	22	61	238	552	1074	677	72	58	85	477		2610039E05Rik	RIKEN cDNA 2610039E05 gene	A	A	A	A	A	P	P	P	P	P	A	A	P
1454424_at	6	138	18	16	20	567	266	213	240	233	81	28	118		2610040L17Rik	RIKEN cDNA 2610040L17 gene	A	A	A	A	A	P	P	P	P	P	A	A	P
1438206_a_at	3421	2018	3886	2788	2287	1136	2121	1680	1603	3277	3912	7089	1630		2610042O14Rik	RIKEN cDNA 2610042O14 gene	P	P	P	P	P	P	P	P	P	P	P	P	P
1443883_at	119	192	128	89	100	218	166	116	174	80	130	248	101		2610042O14Rik	RIKEN cDNA 2610042O14 gene	P	P	P	A	P	P	P	P	P	P	P	P	P
1447290_at	59	169	77	107	148	134	106	87	103	160	225	328	19		2610042O14Rik	RIKEN cDNA 2610042O14 gene	P	P	P	A	A	P	A	P	A	P	P	P	A
1450057_at	450	417	661	354	319	152	438	295	254	621	956	2575	159		2610042O14Rik	RIKEN cDNA 2610042O14 gene	P	P	P	P	P	A	P	P	P	P	P	P	P
1428693_at	128	119	96	77	232	106	95	200	137	160	89	86	198		2610044O15Rik	RIKEN cDNA 2610044O15 gene	P	P	P	P	P	P	P	P	P	P	P	P	P
1455715_at	316	195	231	305	374	1168	824	1401	939	242	213	227	1525		2610044O15Rik	RIKEN cDNA 2610044O15 gene	P	P	P	P	P	P	P	P	P	P	P	P	P
1434941_s_at	686	817	465	522	675	688	516	957	619	349	345	358	886		2610101J03Rik	RIKEN cDNA 2610101J03 gene	P	P	P	P	P	P	P	P	P	P	P	P	P
1434942_at	1135	1657	1060	951	1195	2189	719	791	1053	764	974	922	2024		2610101J03Rik	RIKEN cDNA 2610101J03 gene	P	P	P	P	P	P	P	P	P	P	P	P	P
1434300_at	219	274	251	205	273	512	217	188	170	273	252	185	253		2610101N10Rik	RIKEN cDNA 2610101N10 gene	P	P	P	P	P	P	P	P	P	P	P	P	P
1454914_at	1930	2030	1923	1681	2144	1396	1702	1528	1475	1838	1676	1602	1811		2610101N10Rik	RIKEN cDNA 2610101N10 gene	P	P	P	P	P	P	P	P	P	P	P	P	P
1453032_at	2540	2854	2277	2972	3155	3029	3796	3757	2818	2124	1310	749	3995		2610109B12Rik	RIKEN cDNA 2610109B12 gene	P	P	P	P	P	P	P	P	P	P	P	P	P
1429006_s_at	265	477	320	260	278	328	198	48	96	504	903	679	53		2610110G12Rik	RIKEN cDNA 2610110G12 gene	P	P	P	P	P	P	P	P	P	P	P	P	P
1429603_at	84	661	180	149	194	238	175	115	85	299	262	271	67		2610110G12Rik	RIKEN cDNA 2610110G12 gene	P	P	P	A	A	P	A	P	P	P	P	P	A
1452979_at	328	479	612	483	381	1596	2060	951	710	1141	1456	1628	283		2610110G12Rik	RIKEN cDNA 2610110G12 gene	P	P	P	P	P	P	P	P	P	P	P	P	P
1419651_at	76	58	115	59	51	157	204	136	90	132	292	891	99		2610200G18Rik	RIKEN cDNA 2610200G18 gene	P	A	P	A	A	A	P	P	P	P	P	P	P
1419652_s_at	229	350	355	161	78	606	993	296	260	344	963	3320	422		2610200G18Rik	RIKEN cDNA 2610200G18 gene	A	P	P	A	A	P	A	P	P	P	P	P	P
1449553_at	1247	1532	1556	856	321	4341	4192	1310	1243	1660	5365	15178	1647		2610200G18Rik	RIKEN cDNA 2610200G18 gene	P	P	P	A	A	P	P	P	P	P	P	P	P
1439516_at	220	324	360	144	180	1903	1611	883	573	365	415	129	520		2610201A13Rik	RIKEN cDNA 2610201A13 gene	P	P	P	P	P	P	P	P	P	P	P	P	P
1455160_at	896	2555	1011	633	766	940	660	617	456	672	226	179	525		2610203C20Rik	RIKEN cDNA 2610203C20 gene	P	P	P	P	P	P	P	P	P	P	P	P	P
1429421_at	313	326	370	321	356	218	201	364	203	460	239	167	236		2610203E10Rik	RIKEN cDNA 2610203E10 gene	P	P	P	P	P	P	P	P	P	P	P	P	P
1428966_at	1200	903	749	741	922	829	1155	1505	1401	943	754	638	1728		2610204K14Rik	RIKEN cDNA 2610204K14 gene	P	P	P	P	P	P	P	P	P	P	P	P	P
1424636_at	1367	1449	2610	1619	1241	1483	2159	1051	1542	2305	2393	1354	1082		2610204L23Rik	RIKEN cDNA 2610204L23 gene	P	P	P	P	P	P	P	P	P	P	P	P	P
1424637_s_at	8987	14757	11849	6383	7726	12430	7516	6204	7093	7926	11630	11151	9517		2610204L23Rik	RIKEN cDNA 2610204L23 gene	P	P	P	P	P	P	P	P	P	P	P	P	P
1451420_at	1668	838	1149	883	975	1383	1426	2428	2349	957	2093	2074	2402		2610204L23Rik	RIKEN cDNA 2610204L23 gene	P	P	P	P	P	P	P	P	P	P	P	P	P
1432184_a_at	427	180	129	374	305	183	203	344	341	82	223	1246	253		2610204M08Rik	RIKEN cDNA 2610204M08 gene	P	A	A	P	A	A	P	P	P	A	A	P	P
1436216_s_at	1318	143	185	989	824	362	442	905	919	157	490	3986	816		2610204M08Rik	RIKEN cDNA 2610204M08 gene	P	A	P	P	P	P	P	P	P	P	P	P	P
1451278_a_at	920	601	1186	961	980	1154	2240	1157	1115	1517	1126	818	974		2610205E22Rik	RIKEN cDNA 2610205E22 gene	P	P	P	P	P	P	P	P	P	P	P	P	P
1428498_at	419	254	306	228	275	918	493	337	371	992	326	221	499		2610206B13Rik	RIKEN cDNA 2610206B13 gene	P	P	P	P	P	P	P	P	P	P	P	P	P
1455608_at	133	331	281	169	170	209	161	234	235	208	191	150	266		2610207F23Rik	RIKEN cDNA 2610207F23 gene	P	P	P	P	P	P	P	P	P	P	P	P	P
1428539_at	404	867	431	520	611	1409	506	620	591	949	745	426	808		2610207I05Rik	RIKEN cDNA 2610207I05 gene	P	P	P	P	P	P	P	P	P	P	P	P	P
1427934_at	1533	1109	1215	1104	1119	1868	1195	1100	1042	986	1532	2094	915		2610208E05Rik	RIKEN cDNA 2610208E05 gene	P	P	P	P	P	P	P	P	P	P	P	P	P
1427935_at	343	259	336	427	321	201	432	408	293	384	492	567	400		2610208E05Rik	RIKEN cDNA 2610208E05 gene	P	P	P	P	P	P	P	P	P	P	P	P	P
1423870_at	1851	1238	1339	1504	1355	1091	1506	1189	1170	962	934	956	874		2610208M17Rik	RIKEN cDNA 2610208M17 gene	P	P	P	P	P	P	P	P	P	P	P	P	P
1460345_at	426	649	448	511	392	395	493	408	351	279	225	235	495		2610208M17Rik	RIKEN cDNA 2610208M17 gene	P	P	P	P	P	P	P	P	P	P	P	P	P
1439901_at	275	180	284	180	208	561	363	296	299	148	128	163	175		2610208M17Rik	RIKEN cDNA 2610208M17 gene	P	P	P	P	P	P	P	P	P	P	P	P	P
1423357_at	179	68	165	162	249	159	225	276	186	97	128	242	177		2610209A20Rik	RIKEN cDNA 2610209A20 gene	A	A	P	A	A	A	P	A	A	A	A	P	A
1415714_a_at	1042	488	919	1407	1301	706	1112	966	621	1170	905	938	1091		2610209M04Rik	RIKEN cDNA 2610209M04 gene	P	P	P	P	P	P	P	P	P	P	P	P	P
1460697_s_at	1536	1028	2196	1495	1580	1135	2276	1654	1738	1337	1583	1935	2034		2610209M04Rik	RIKEN cDNA 2610209M04 gene	P	P	P	P	P	P	P	P	P	P	P	P	P
1452902_at	248	628	1011	720	779	660	1200	582	433	1817	640	275	700		2610209N15Rik	RIKEN cDNA 2610209N15 gene	P	P	P	P	P	P	P	P	P	P	P	P	P
1429451_at	507	641	467	387	597	190	203	609	321	245	366	417	691		2610301B20Rik	RIKEN cDNA 2610301B20 gene	P	P	P	P	P	P	P	P	P	P	P	P	P
1460125_at	85	102	140	98	117	17	21	5	436	2	4	5	49		2610301F02Rik	RIKEN cDNA 2610301F02 gene	P	P	P	P	P	A	A	A	P	A	A	A	A
1426012_a_at	373	374	483	446	371	516	727	774	625	668	467	433	466		2610301G19Rik	RIKEN cDNA 2610301G19 gene	P	P	P	P	P	P	P	P	P	P	P	P	P
1429336_at	116	111	109	37	78	276	158	246	192	105	157	195	188		2610301K12Rik	RIKEN cDNA 2610301K12 gene	P	P	P	A	P	P	P	P	P	P	P	P	P
1429337_at	247	222	231	115	154	603	552	689	708	208	209	189	516		2610301K12Rik	RIKEN cDNA 2610301K12 gene	P	P	P	A	A	P	P	P	P	P	P	A	P
1433740_at	464	480	385	415	393	492	271	261	489	584	827	863	323		2610301K12Rik	RIKEN cDNA 2610301K12 gene	P	P	P	P	P	P	P	P	P	P	P	P	P
1427887_at	1153	421	552	864	766	580	631	693	875	710	391	534	697		2610304G08Rik	RIKEN cDNA 2610304G08 gene	P	P	P	P	P	P	P	P	P	P	P	P	P
1426936_at	544	311	181	39	103	5	17	27	4	402	103	21	34		2610305J24Rik /// BC005512 /// LOC215866 /// LOC629242 /// LOC630153 /// LOC630525 /// LOC631386 /// LOC637482 /// LOC641366 /// LOC668904 /// LOC669019 /// LOC669231 /// LOC669436 /// LOC670270 /// LOC670719 /// LOC672061 /// LOC672196 /// LOC672939 /// LOC673876 /// LOC674912 /// LOC674927 /// LOC675168 /// LOC675410 /// LOC675706 /// LOC676247 /// LOC676718 /// LOC677506	RIKEN cDNA 2610305J24 gene /// cDNA sequence BC005512 /// hypothetical protein LOC215866 /// hypothetical protein LOC629242 /// similar to melanoma antigen /// similar to melanoma antigen /// similar to melanoma antigen /// similar to melanoma antigen /// hypothetical ENV polyprotein /// similar to melanoma antigen /// hypothetical protein LOC669019 /// similar to melanoma antigen /// hypothetica…	P	P	P	A	P	A	A	A	A	P	P	A	A
1435628_x_at	461	485	259	76	177	83	42	29	51	266	137	86	53		2610305J24Rik /// BC005512 /// LOC629242 /// LOC630525 /// LOC631386 /// LOC637482 /// LOC641366 /// LOC668904 /// LOC669885 /// LOC670270 /// LOC672061 /// LOC672939 /// LOC672969 /// LOC673876 /// LOC674927 /// LOC675168 /// LOC675706 /// LOC676247 /// LOC676718 /// LOC677506	RIKEN cDNA 2610305J24 gene /// cDNA sequence BC005512 /// hypothetical protein LOC629242 /// similar to melanoma antigen /// similar to melanoma antigen /// similar to melanoma antigen /// hypothetical ENV polyprotein /// similar to melanoma antigen /// similar to melanoma antigen /// hypothetical protein LOC670270 /// similar to melanoma antigen /// similar to melanoma antigen /// hypothetical p…	P	P	P	P	P	P	A	A	A	P	P	A	A
1453006_at	403	5829	7398	857	276	140	212	101	108	313	207	206	144		2610306H15Rik	RIKEN cDNA 2610306H15 gene	P	P	P	P	P	P	P	P	P	P	P	P	P
1452988_at	322	168	363	366	365	145	427	558	409	510	441	540	371		2610306M01Rik	RIKEN cDNA 2610306M01 gene	P	P	P	P	P	P	P	P	P	P	P	P	P
1427876_at	1995	1418	1596	1397	1566	2721	2304	2467	2439	1655	1533	1481	2591		2610312B22Rik	RIKEN cDNA 2610312B22 gene	P	P	P	P	P	P	P	P	P	P	P	P	P
1427877_at	1683	2498	1509	1712	1775	3481	2278	2606	2762	1233	1656	1280	4476		2610312B22Rik	RIKEN cDNA 2610312B22 gene	P	P	P	P	P	P	P	P	P	P	P	P	P
1453684_s_at	566	660	708	666	600	1106	941	915	1064	541	696	655	1517		2610312B22Rik	RIKEN cDNA 2610312B22 gene	P	P	P	P	P	P	P	P	P	P	P	P	P
1457643_x_at	161	514	272	174	298	235	247	244	228	351	271	240	186		2610316D01Rik	RIKEN cDNA 2610316D01 gene	A	P	A	A	A	A	A	A	A	P	A	A	A
1458702_at	56	375	244	231	428	179	209	238	127	446	299	227	126		2610316D01Rik	RIKEN cDNA 2610316D01 gene	A	P	P	P	P	P	A	P	P	P	P	P	A
1438429_at	218	946	473	508	583	1208	582	377	471	1352	884	996	276		2610319H10Rik	RIKEN cDNA 2610319H10 gene	A	P	P	P	P	P	P	P	P	P	P	P	P
1426820_at	5653	6715	7614	7384	6054	2756	3083	2443	2977	4127	2928	3209	3360		2610507B11Rik	RIKEN cDNA 2610507B11 gene	P	P	P	P	P	P	P	P	P	P	P	P	P
1455905_at	734	648	1580	607	1533	367	442	360	428	574	392	557	278		2610507B11Rik	RIKEN cDNA 2610507B11 gene	P	P	P	P	P	P	P	P	P	P	P	P	P
1453749_at	204	291	443	562	419	128	195	122	214	384	297	311	160		2610507I01Rik	RIKEN cDNA 2610507I01 gene	P	P	P	P	P	P	P	P	P	P	P	P	P
1421948_a_at	380	498	543	216	183	651	644	332	366	451	214	289	423		2610507L03Rik	RIKEN cDNA 2610507L03 gene	P	P	P	P	A	P	P	P	P	P	P	P	P
1428371_at	352	560	419	787	1004	1047	767	1035	932	657	543	851	1441		2610507N02Rik	RIKEN cDNA 2610507N02 gene	P	P	P	P	P	P	P	P	P	P	P	P	P
1460037_at	2067	2230	2276	1421	1453	2395	2016	1616	1848	2254	1411	790	1825		2610510H03Rik	RIKEN cDNA 2610510H03 gene	P	P	P	P	P	P	P	P	P	P	P	P	P
1427105_at	580	515	281	111	120	177	128	186	165	749	284	322	149		2610510J17Rik	RIKEN cDNA 2610510J17 gene	P	P	P	A	A	A	A	P	P	P	P	P	A
1452305_s_at	311	269	207	48	72	66	86	85	90	423	192	165	70		2610510J17Rik	RIKEN cDNA 2610510J17 gene	P	P	P	A	A	A	A	A	A	P	P	P	A
1428493_at	708	777	443	501	545	1020	416	694	637	446	325	265	622		2610511M17Rik /// LOC672426	RIKEN cDNA 2610511M17 gene /// similar to signal-induced proliferation-associated 1 like 3	P	P	P	A	A	P	P	P	P	P	A	P	P
1452665_at	243	241	289	151	146	397	502	528	354	632	496	299	379		2610511O17Rik	RIKEN cDNA 2610511O17 gene	P	P	P	P	P	P	P	P	P	P	P	P	P
1439253_x_at	6481	5177	4400	2590	2232	4687	8794	6507	6065	4003	6535	8162	5311		2610524G07Rik	RIKEN cDNA 2610524G07 gene	P	P	P	P	P	P	P	P	P	P	P	P	P
1448202_x_at	4617	3745	3538	2350	2001	3271	6045	5060	4565	3197	4613	5248	3896		2610524G07Rik	RIKEN cDNA 2610524G07 gene	P	P	P	P	P	P	P	P	P	P	P	P	P
1431420_s_at	2720	1356	2196	1563	1249	1467	3797	3174	2599	2006	2232	2834	2047		2610524G07Rik	RIKEN cDNA 2610524G07 gene	P	P	P	P	P	P	P	P	P	P	P	P	P
1431421_x_at	566	403	493	439	429	548	589	654	669	594	650	722	524		2610524G07Rik	RIKEN cDNA 2610524G07 gene	P	P	P	P	P	P	P	P	P	P	P	P	P
1429244_at	292	502	419	175	234	504	635	680	387	431	283	376	414		2610524H06Rik	RIKEN cDNA 2610524H06 gene	P	P	P	P	P	P	P	P	P	P	P	P	P
1429232_at	89	225	178	96	111	575	470	294	300	329	209	165	393		2610528B01Rik	RIKEN cDNA 2610528B01 gene	P	P	P	P	P	P	P	P	P	P	P	P	P
1428519_at	522	330	470	333	241	568	842	782	724	819	612	393	688		2610528E23Rik	RIKEN cDNA 2610528E23 gene	P	P	P	P	P	P	P	P	P	P	P	P	P
1428121_at	1596	1705	1824	1758	1581	1697	2631	2450	2026	2330	2264	3153	1980		2610528K11Rik	RIKEN cDNA 2610528K11 gene	P	P	P	P	P	P	P	P	P	P	P	P	P
1428122_s_at	1258	1884	2363	1824	1277	2063	2688	1850	1580	2389	2303	3296	1568		2610528K11Rik	RIKEN cDNA 2610528K11 gene	P	P	P	P	P	P	P	P	P	P	P	P	P
1423620_at	890	1864	733	525	484	303	208	226	253	844	953	589	324		2610528M18Rik	RIKEN cDNA 2610528M18 gene	P	P	P	P	P	P	P	P	P	P	P	P	P
1419459_a_at	763	1486	1056	1022	1376	190	125	156	329	398	1277	2063	332		2610529C04Rik	RIKEN cDNA 2610529C04 gene	P	P	P	P	P	P	P	P	P	P	P	P	P
1436859_at	1748	2807	1877	1796	1356	1486	1009	1537	1261	1945	1234	1089	1733		2700007P21Rik	RIKEN cDNA 2700007P21 gene	P	P	P	P	P	P	P	P	P	P	P	P	P
1459902_at	159	142	168	121	145	98	103	111	76	136	145	246	91		2700007P21Rik	RIKEN cDNA 2700007P21 gene	P	P	P	A	P	P	P	P	P	P	P	P	P
1424686_at	501	484	457	456	406	283	253	237	264	537	312	294	172		2700008B19Rik	RIKEN cDNA 2700008B19 gene	P	P	P	P	P	P	P	P	P	P	P	P	P
1424687_at	274	297	234	263	275	163	209	182	177	428	388	359	194		2700008B19Rik	RIKEN cDNA 2700008B19 gene	P	P	P	P	P	P	P	P	P	P	P	P	P
1439601_at	200	292	226	239	269	219	149	109	141	300	191	217	222		2700008B19Rik	RIKEN cDNA 2700008B19 gene	P	P	P	P	P	P	P	P	P	P	P	P	P
1453328_at	137	357	243	236	237	136	130	12	40	546	184	64	45		2700008G24Rik	RIKEN cDNA 2700008G24 gene	P	P	P	P	P	P	A	P	A	P	P	A	A
1428596_at	3134	760	1553	2243	1688	397	628	1165	1238	1637	2106	3346	1724		2700008N14Rik	RIKEN cDNA 2700008N14 gene	P	P	P	P	P	P	P	P	P	P	P	P	P
1428597_at	439	242	423	449	412	213	231	269	290	419	372	387	359		2700008N14Rik	RIKEN cDNA 2700008N14 gene	P	P	P	P	P	A	P	P	P	P	P	P	P
1436899_at	491	624	492	422	533	555	339	334	405	656	569	393	496		2700019D07Rik	RIKEN cDNA 2700019D07 gene	P	P	P	P	P	P	P	P	P	P	P	P	P
1455878_at	85	263	105	118	175	98	189	102	142	556	348	143	122		2700023E23Rik	RIKEN cDNA 2700023E23 gene	A	P	P	P	P	P	P	P	P	P	P	P	A
1452877_at	2833	2598	3100	2380	2385	4916	3411	2335	2169	3152	3154	1701	3958		2700029M09Rik	RIKEN cDNA 2700029M09 gene	P	P	P	P	P	P	P	P	P	P	P	P	P
1428381_a_at	2445	1623	2863	2155	2010	1057	2532	1818	1970	2733	4827	5067	1643		2700038C09Rik	RIKEN cDNA 2700038C09 gene	P	P	P	P	P	P	P	P	P	P	P	P	P
1453745_at	111	305	111	80	125	123	134	116	123	270	246	90	87		2700038G22Rik	RIKEN cDNA 2700038G22 gene	A	A	A	A	A	A	A	A	A	P	A	A	A
1417807_at	70	91	71	72	45	234	391	320	259	228	105	97	107		2700038N03Rik	RIKEN cDNA 2700038N03 gene	A	P	P	A	A	P	P	P	P	P	P	A	P
1447822_x_at	136	204	121	117	168	523	469	479	274	311	159	142	230		2700038N03Rik	RIKEN cDNA 2700038N03 gene	P	P	P	P	P	P	P	P	P	P	P	P	P
1453428_at	57	100	210	120	120	83	202	235	135	268	137	7	65		2700045P11Rik	RIKEN cDNA 2700045P11 gene	A	A	P	A	A	A	A	P	P	P	A	A	A
1456995_at	61	160	283	273	298	449	433	348	406	526	311	54	179		2700045P11Rik	RIKEN cDNA 2700045P11 gene	A	P	P	P	P	P	P	P	P	P	P	A	P
1430118_at	27	53	59	23	55	38	12	4	50	22	54	809	30		2700046A07Rik	RIKEN cDNA 2700046A07 gene	A	A	A	A	A	A	A	A	A	A	A	P	A
1453645_at	22	162	201	92	122	49	43	21	68	23	76	831	91		2700046A07Rik	RIKEN cDNA 2700046A07 gene	A	P	P	P	A	A	A	A	A	A	A	P	P
1431163_at	181	144	241	252	254	118	136	182	150	182	281	363	90		2700046G09Rik	RIKEN cDNA 2700046G09 gene	P	A	P	P	P	P	P	P	A	P	P	P	P
1429595_at	309	303	242	204	203	240	253	207	269	446	201	170	230		2700049A03Rik	RIKEN cDNA 2700049A03 gene	P	P	P	P	P	P	A	P	P	P	P	P	P
1427112_at	425	563	656	391	431	1730	1475	863	666	553	217	63	1156		2700049H19Rik	RIKEN cDNA 2700049H19 gene	P	P	P	P	P	P	P	P	P	P	P	P	P
1427113_s_at	1354	1778	1748	1415	1070	5160	4000	2263	2060	1473	732	168	3351		2700049H19Rik	RIKEN cDNA 2700049H19 gene	P	P	P	P	P	P	P	P	P	P	P	P	P
1451391_at	226	332	314	280	329	603	352	561	422	572	335	252	315		2700050L05Rik	RIKEN cDNA 2700050L05 gene	P	P	P	P	P	P	P	P	P	P	P	P	P
1416713_at	2818	350	459	922	634	994	2381	1491	1343	135	2603	15059	869		2700055K07Rik	RIKEN cDNA 2700055K07 gene	P	A	P	P	P	P	P	P	P	A	P	P	P
1428237_at	6038	4116	5039	4729	5327	6980	6193	8417	5699	6534	5587	6432	5113		2700059D21Rik	RIKEN cDNA 2700059D21 gene	P	P	P	P	P	P	P	P	P	P	P	P	P
1435413_x_at	6002	5003	5005	3429	3093	3084	6248	4468	4813	4984	5485	4830	4751		2700060E02Rik	RIKEN cDNA 2700060E02 gene	P	P	P	P	P	P	P	P	P	P	P	P	P
1437450_x_at	6184	5053	4994	3785	3219	3724	6142	5745	5220	5181	5807	6441	5676		2700060E02Rik	RIKEN cDNA 2700060E02 gene	P	P	P	P	P	P	P	P	P	P	P	P	P
1448238_at	6635	4434	4720	4228	3428	3820	7711	5711	5653	6731	7893	9167	5314		2700060E02Rik	RIKEN cDNA 2700060E02 gene	P	P	P	P	P	P	P	P	P	P	P	P	P
1450425_a_at	309	178	169	175	168	275	396	338	328	304	264	281	259		2700062C07Rik	RIKEN cDNA 2700062C07 gene	A	A	P	A	A	A	A	P	P	A	A	A	A
1426999_at	2109	2859	2844	2011	1503	2865	2956	2131	2290	2223	1590	1240	2120		2700069A02Rik	RIKEN cDNA 2700069A02 gene	P	P	P	P	P	P	P	P	P	P	P	P	P
1431745_a_at	1928	1405	1608	1233	1322	1002	1928	1531	1623	1822	927	979	1338		2700069A02Rik	RIKEN cDNA 2700069A02 gene	P	P	P	P	P	P	P	P	P	P	P	P	P
1424982_a_at	242	103	130	123	161	148	140	224	172	256	207	188	182		2700078E11Rik	RIKEN cDNA 2700078E11 gene	P	P	P	P	A	P	P	P	P	P	P	P	P
1451556_a_at	367	360	267	240	241	355	254	338	285	362	343	365	406		2700078E11Rik	RIKEN cDNA 2700078E11 gene	P	P	P	P	P	P	P	P	P	P	P	P	P
1436362_x_at	418	1161	605	684	526	636	687	458	677	1103	1565	2236	679		2700079J08Rik	RIKEN cDNA 2700079J08 gene	P	P	P	P	P	P	P	P	P	P	P	P	P
1437291_at	119	268	277	228	220	887	658	234	344	552	338	161	164		2700081O15Rik	RIKEN cDNA 2700081O15 gene	P	P	P	P	P	P	P	P	P	P	P	P	P
1436018_at	166	498	216	241	297	297	311	381	192	169	97	108	265		2700083E18Rik	RIKEN cDNA 2700083E18 gene	A	P	P	A	A	P	P	P	A	A	P	A	P
1455529_at	191	877	406	152	155	551	694	224	152	390	220	68	182		2700083E18Rik	RIKEN cDNA 2700083E18 gene	P	P	P	P	A	P	P	P	P	P	P	A	P
1428421_a_at	4413	2420	3135	2886	2332	1970	2361	1912	2582	3532	6313	13081	2805		2700085E05Rik	RIKEN cDNA 2700085E05 gene	P	P	P	P	P	P	P	P	P	P	P	P	P
1435523_s_at	114	322	197	128	306	252	149	449	325	162	227	211	374		2700089E24Rik	RIKEN cDNA 2700089E24 gene	P	P	P	P	P	P	P	P	P	P	P	P	P
1453208_at	1643	1403	2019	2034	2860	2389	1693	3212	2784	3176	2926	2145	2853		2700089E24Rik	RIKEN cDNA 2700089E24 gene	P	P	P	P	P	P	P	P	P	P	P	P	P
1460464_at	562	251	610	431	612	398	417	666	692	622	772	911	759		2700089E24Rik	RIKEN cDNA 2700089E24 gene	P	P	P	P	P	P	P	P	P	P	P	P	P
1426797_at	416	367	430	410	577	105	128	177	177	325	258	248	180		2700094F01Rik	RIKEN cDNA 2700094F01 gene	P	P	P	P	P	P	P	P	P	P	P	P	P
1452199_at	895	796	860	1100	1241	689	430	494	490	1056	694	636	482		2700094F01Rik	RIKEN cDNA 2700094F01 gene	P	P	P	P	P	P	P	P	P	P	P	P	P
1436349_at	1660	1559	1776	579	391	1459	2799	1329	1433	2773	1324	793	1093		2700094K13Rik	RIKEN cDNA 2700094K13 gene	P	P	P	P	P	P	P	P	P	P	P	P	P
1428810_at	450	722	687	907	862	455	493	381	353	1037	928	634	407		2700097O09Rik	RIKEN cDNA 2700097O09 gene	P	P	P	P	P	P	P	P	P	P	P	P	P
1436322_a_at	247	637	464	206	506	351	330	508	283	1645	1499	1645	704		2810001A02Rik	RIKEN cDNA 2810001A02 gene	P	P	P	P	P	P	P	P	P	P	P	P	P
1436323_at	362	425	470	477	441	296	456	363	499	935	911	985	377		2810001A02Rik	RIKEN cDNA 2810001A02 gene	P	P	P	P	P	P	P	P	P	P	P	P	P
1455170_at	171	261	432	383	447	187	280	443	326	674	413	252	347		2810001G20Rik	RIKEN cDNA 2810001G20 gene	P	P	P	P	P	P	P	P	P	P	P	P	P
1452312_at	106	103	119	105	107	173	162	110	109	266	273	172	118		2810002D19Rik	RIKEN cDNA 2810002D19 gene	P	P	P	P	P	P	P	P	P	P	P	P	P
1456355_s_at	339	703	881	699	512	420	627	571	459	686	618	691	384		2810002G02Rik /// LOC671202	RIKEN cDNA 2810002G02 gene /// region containing RIKEN cDNA 2810002G02 gene; tuftelin interacting protein 11	P	P	P	P	P	P	P	P	P	P	P	P	P
1429248_at	1117	740	1418	1199	1159	699	1364	1050	1239	1098	1150	1184	967		2810002N01Rik	RIKEN cDNA 2810002N01 gene	P	P	P	P	P	P	P	P	P	P	P	P	P
1453774_at	141	284	326	360	315	846	556	230	293	362	239	176	202		2810002O09Rik	RIKEN cDNA 2810002O09 gene	P	P	P	P	P	P	P	P	P	P	P	P	P
1424262_at	237	414	632	406	473	225	149	88	298	517	257	227	57		2810003C17Rik	RIKEN cDNA 2810003C17 gene	A	A	P	A	A	A	A	A	A	A	A	A	A
1424263_at	196	327	367	211	124	93	29	15	153	423	143	326	120		2810003C17Rik	RIKEN cDNA 2810003C17 gene	P	P	P	P	A	A	A	A	P	P	P	P	P
1451287_s_at	125	206	456	146	93	4	48	2	124	292	70	141	29		2810003C17Rik	RIKEN cDNA 2810003C17 gene	P	P	P	P	P	A	A	P	P	P	P	P	A
1429893_at	209	3137	3250	943	1093	115	118	106	409	592	103	19	262		2810004A10Rik	RIKEN cDNA 2810004A10 gene	P	P	P	P	P	A	A	A	P	P	A	A	P
1434870_at	946	1278	1165	1479	1507	565	624	667	599	1475	1522	1614	694		2810004N23Rik	RIKEN cDNA 2810004N23 gene	P	P	P	P	P	P	P	P	P	P	P	P	P
1448947_at	734	272	338	400	501	211	246	238	196	417	461	528	253		2810004N23Rik	RIKEN cDNA 2810004N23 gene	P	P	P	P	P	P	P	P	P	P	P	P	P
1452737_at	3144	5494	4630	6167	6497	1235	1386	1871	1962	3463	6502	10006	3842		2810008M24Rik	RIKEN cDNA 2810008M24 gene	P	P	P	P	P	P	P	P	P	P	P	P	P
1441087_at	14	14	26	20	29	484	573	528	322	89	595	164	404		2810011L19Rik	RIKEN cDNA 2810011L19 gene	A	A	A	A	A	P	P	P	P	A	P	P	P
1452669_at	926	615	888	1027	711	1046	1013	1089	1043	1511	850	1337	828		2810012G03Rik	RIKEN cDNA 2810012G03 gene	P	P	P	P	P	P	P	P	P	P	P	P	P
1429160_at	522	184	337	396	359	228	405	359	314	264	200	371	403		2810012L14Rik	RIKEN cDNA 2810012L14 gene	P	A	A	A	A	A	A	P	P	P	P	P	P
1447923_at	655	3547	3009	2420	2739	3335	1996	1677	1614	2055	2384	2168	833		2810013C04Rik	RIKEN cDNA 2810013C04 gene	P	P	P	P	P	P	P	P	P	P	P	P	P
1452991_at	68	796	381	248	329	428	157	85	75	419	381	131	52		2810013C04Rik	RIKEN cDNA 2810013C04 gene	P	P	P	P	P	P	A	P	P	P	P	P	A
1429767_at	85	185	196	280	266	212	223	277	214	626	408	284	233		2810013P06Rik	RIKEN cDNA 2810013P06 gene	P	P	P	P	P	P	P	P	P	P	P	P	P
1427349_x_at	2085	2530	2479	1790	3242	1168	1106	2829	1044	1080	929	915	2400		2810021G02Rik	RIKEN cDNA 2810021G02 gene	P	P	P	P	P	P	P	P	P	P	P	P	P
1453747_at	303	427	327	256	288	388	393	500	324	366	264	187	322		2810021J22Rik	RIKEN cDNA 2810021J22 gene	P	P	P	P	P	P	P	P	P	P	P	P	P
1425913_a_at	481	588	722	354	356	555	1079	874	690	1028	231	164	713		2810022L02Rik	RIKEN cDNA 2810022L02 gene	P	A	P	A	A	P	P	P	P	P	A	A	P
1455566_s_at	143	168	167	156	128	142	289	165	197	340	85	78	197		2810022L02Rik	RIKEN cDNA 2810022L02 gene	P	P	P	P	A	P	P	P	P	P	P	P	P
1428452_at	785	608	527	171	110	350	900	679	1071	1042	855	992	476		2810025M15Rik	RIKEN cDNA 2810025M15 gene	P	P	P	P	A	P	P	P	P	P	P	P	P
1428529_at	722	1243	649	815	1151	1992	907	722	655	2071	2107	1664	499		2810026P18Rik	RIKEN cDNA 2810026P18 gene	P	P	P	P	P	P	P	P	P	P	P	P	P
1449345_at	655	1196	739	649	1052	395	273	179	114	301	431	402	245		2810027O19Rik	RIKEN cDNA 2810027O19 gene	P	P	P	P	P	P	P	P	P	P	P	P	P
1426609_at	538	918	561	480	507	1231	1062	560	516	764	666	391	438		2810028N01Rik	RIKEN cDNA 2810028N01 gene	P	P	P	P	P	P	P	P	P	P	P	P	P
1417913_at	1159	510	791	740	634	468	556	474	598	955	1275	2238	579		2810037C03Rik	RIKEN cDNA 2810037C03 gene	P	P	P	P	P	P	P	P	P	P	P	P	P
1417062_at	787	555	697	415	316	1261	1472	804	924	714	546	429	606		2810037C14Rik	RIKEN cDNA 2810037C14 gene	P	P	P	P	P	P	P	P	P	P	P	P	P
1428866_at	305	3803	4762	7447	5861	3561	2805	1813	1722	2774	902	1318	2991		2810037O22Rik	RIKEN cDNA 2810037O22 gene	P	P	P	P	P	P	P	P	P	P	P	P	P
1430195_at	25	252	56	76	82	42	25	18	44	189	207	130	44		2810043O03Rik	RIKEN cDNA 2810043O03 gene	A	P	P	P	P	A	A	A	P	P	P	P	P
1455524_at	402	920	791	622	704	482	368	480	492	974	621	358	541		2810046L04Rik	RIKEN cDNA 2810046L04 gene	P	P	P	P	P	P	P	P	P	P	P	P	P
1424692_at	363	160	348	332	344	40	63	60	87	145	48	23	69		2810055F11Rik	RIKEN cDNA 2810055F11 gene	P	P	P	P	P	P	P	P	P	P	A	A	P
1431424_at	103	446	417	447	388	46	62	46	79	206	127	68	54		2810055G20Rik	RIKEN cDNA 2810055G20 gene	P	P	P	P	P	P	P	P	P	P	P	A	P
1437532_at	352	255	429	377	403	353	382	348	428	767	310	268	250		2810055G22Rik /// LOC673825	RIKEN cDNA 2810055G22 gene /// similar to ubiquitin conjugating enzyme 7 interacting protein 1	P	P	P	P	A	P	P	P	P	P	P	P	P
1431923_at	85	220	1316	1940	2122	56	90	277	247	22	87	69	262		2810401C16Rik	RIKEN cDNA 2810401C16 gene	A	A	P	P	P	A	A	A	A	A	A	A	A
1434742_s_at	275	711	3886	7275	6832	175	249	602	578	100	109	120	667		2810401C16Rik	RIKEN cDNA 2810401C16 gene	P	P	P	P	P	P	P	P	P	A	A	P	P
1453040_at	181	198	264	227	286	245	178	305	229	258	270	254	310		2810402A17Rik	RIKEN cDNA 2810402A17 gene	P	P	P	P	P	P	P	P	P	P	P	P	P
1459914_at	329	1956	2542	2857	2152	440	357	573	499	1696	771	1106	684		2810402A17Rik	RIKEN cDNA 2810402A17 gene	P	P	P	P	P	P	P	P	P	P	P	P	P
1426365_at	657	1363	1182	1202	1549	816	853	766	824	1604	1198	721	736		2810403A07Rik	RIKEN cDNA 2810403A07 gene	P	P	P	P	P	P	P	P	P	P	P	P	P
1440854_at	69	438	189	148	172	163	104	84	57	332	201	132	80		2810403A07Rik	RIKEN cDNA 2810403A07 gene	A	P	P	P	P	P	A	P	A	P	P	P	A
1416445_at	2140	1357	1770	1569	2289	3634	2630	2053	2064	3008	4287	5367	2123		2810405J04Rik	RIKEN cDNA 2810405J04 gene	P	P	P	P	P	P	P	P	P	P	P	P	P
1423266_at	721	349	1028	1055	862	2048	2862	3236	2880	2030	6340	6690	2995		2810405K02Rik	RIKEN cDNA 2810405K02 gene	P	P	P	P	P	P	P	P	P	P	P	P	P
1423847_at	728	718	594	555	403	249	426	257	349	1423	290	151	161		2810406C15Rik	RIKEN cDNA 2810406C15 gene	P	P	P	P	P	P	P	P	P	P	P	P	P
1429945_at	28	60	25	43	11	53	115	64	32	24	32	259	68		2810406K13Rik	RIKEN cDNA 2810406K13 gene	A	A	A	A	A	P	A	P	A	A	A	P	A
1452931_at	164	18	222	236	205	183	165	208	111	213	41	75	87		2810408M09Rik	RIKEN cDNA 2810408M09 gene	A	A	P	P	A	A	A	A	A	P	A	A	A
1432750_at	56	1103	300	132	24	3871	2704	1525	1265	1645	513	265	1248		2810409C01Rik	RIKEN cDNA 2810409C01 gene	P	P	P	P	A	P	P	P	P	P	P	P	P
1430053_a_at	365	287	349	212	252	629	672	939	700	268	493	491	767		2810409H07Rik	RIKEN cDNA 2810409H07 gene	P	P	P	P	P	P	P	P	P	P	P	P	P
1438094_x_at	2379	891	1377	1311	1173	4391	3978	4531	3577	1385	2179	2092	3364		2810409H07Rik	RIKEN cDNA 2810409H07 gene	P	P	P	P	P	P	P	P	P	P	P	P	P
1460391_at	452	340	303	208	259	1741	894	850	689	199	356	316	1117		2810409H07Rik	RIKEN cDNA 2810409H07 gene	P	P	P	P	P	P	P	P	P	P	P	P	P
1456339_at	92	102	72	85	88	127	139	101	110	139	286	277	145		2810410D24Rik	RIKEN cDNA 2810410D24 gene	P	P	P	A	P	P	P	P	P	P	P	P	P
1429510_at	103	338	373	305	268	124	100	84	71	1147	1133	788	71		2810410L24Rik	RIKEN cDNA 2810410L24 gene	P	P	P	P	P	P	P	P	A	P	P	P	A
1438972_x_at	307	885	918	743	911	352	435	352	198	3068	3122	1912	257		2810410L24Rik	RIKEN cDNA 2810410L24 gene	P	P	P	P	P	P	P	P	P	P	P	P	P
1423767_at	1690	1695	2127	1421	1386	1870	3031	2278	2138	1804	1850	1878	1583		2810410M20Rik	RIKEN cDNA 2810410M20 gene	P	P	P	P	P	P	P	P	P	P	P	P	P
1433266_at	45	533	122	138	105	117	72	65	71	496	151	10	42		2810416A17Rik	RIKEN cDNA 2810416A17 gene	A	P	P	P	A	P	P	P	A	P	P	A	A
1435171_at	85	163	185	199	136	49	96	64	94	577	559	490	119		2810416G20Rik	RIKEN cDNA 2810416G20 gene	A	P	P	P	A	A	P	P	A	P	P	P	P
1419153_at	952	1396	646	97	83	137	341	137	312	1514	264	29	224		2810417H13Rik	RIKEN cDNA 2810417H13 gene	P	P	P	P	A	P	P	P	P	P	P	A	P
1438982_s_at	59	43	71	68	23	232	244	486	229	86	52	41	353		2810417J12Rik	RIKEN cDNA 2810417J12 gene	A	A	P	A	A	P	P	P	P	A	A	A	P
1429175_at	49	229	369	271	76	5740	4667	6909	6792	3027	4514	4253	6119		2810417M05Rik	RIKEN cDNA 2810417M05 gene	A	P	P	P	A	P	P	P	P	P	P	P	P
1426741_a_at	690	743	679	501	783	395	435	443	453	605	639	533	722		2810421I24Rik	RIKEN cDNA 2810421I24 gene	P	P	P	P	P	P	P	P	P	P	P	P	P
1438319_x_at	372	311	372	321	405	334	394	172	208	298	319	228	504		2810421I24Rik	RIKEN cDNA 2810421I24 gene	P	P	P	P	P	P	P	P	P	P	P	P	P
1452172_at	506	463	463	412	531	325	329	439	326	614	443	395	376		2810421I24Rik	RIKEN cDNA 2810421I24 gene	P	P	P	P	P	P	P	P	P	P	P	P	P
1428090_at	826	527	560	547	482	689	771	561	497	596	595	441	813		2810422B04Rik	RIKEN cDNA 2810422B04 gene	P	P	P	P	P	P	P	P	P	P	P	P	P
1428180_at	631	484	737	844	883	284	521	624	575	577	785	822	470		2810422J05Rik	RIKEN cDNA 2810422J05 gene	P	P	P	P	P	P	P	P	P	P	P	P	P
1428715_at	2547	4007	3360	3724	3211	4159	4253	2903	2485	3119	6909	3329	3374		2810423A18Rik	RIKEN cDNA 2810423A18 gene	P	P	P	P	P	P	P	P	P	P	P	P	P
1438497_at	72	239	107	145	181	143	99	98	89	303	160	110	61		2810423E13Rik	RIKEN cDNA 2810423E13 gene	A	P	P	P	P	P	A	P	A	P	P	P	A
1452335_at	280	333	440	518	730	245	341	338	286	625	656	750	357		2810423E13Rik	RIKEN cDNA 2810423E13 gene	P	P	P	P	P	P	P	P	P	P	P	P	P
1429371_at	227	744	230	94	374	597	356	450	340	472	327	270	850		2810426N06Rik	RIKEN cDNA 2810426N06 gene	P	P	P	P	P	P	P	P	P	P	P	P	P
1437576_at	214	682	335	401	473	328	176	182	325	207	159	252	89		2810427A07Rik	RIKEN cDNA 2810427A07 gene	P	P	P	P	P	P	P	P	P	P	P	P	P
1418702_a_at	761	610	1236	767	625	638	1550	1123	985	1399	1008	1155	651		2810428I15Rik	RIKEN cDNA 2810428I15 gene	P	P	P	P	P	P	P	P	P	P	P	P	P
1418542_s_at	411	227	222	190	177	241	158	136	153	383	257	263	131		2810429O05Rik	RIKEN cDNA 2810429O05 gene	P	P	P	P	P	P	A	P	P	P	P	P	P
1417096_at	691	538	717	322	396	565	630	447	451	904	670	232	451		2810430M08Rik	RIKEN cDNA 2810430M08 gene	P	P	P	P	P	P	P	P	P	P	P	P	P
1427085_at	1054	519	927	1325	1143	641	828	816	716	1550	570	590	730		2810432D09Rik	RIKEN cDNA 2810432D09 gene	P	P	P	P	P	P	P	P	P	P	P	P	P
1423679_at	1928	1421	4706	4328	3370	6547	7200	4997	4650	5211	2002	1856	3596		2810432L12Rik	RIKEN cDNA 2810432L12 gene	P	P	P	P	P	P	P	P	P	P	P	P	P
1433205_at	76	334	100	132	108	872	247	163	216	264	226	171	63		2810436B12Rik	RIKEN cDNA 2810436B12 gene	P	P	P	P	P	P	P	P	P	P	P	P	P
1434923_at	3261	906	1306	1970	1775	1379	2103	1684	1763	1334	1796	2360	1640		2810437L13Rik	RIKEN cDNA 2810437L13 gene	P	P	P	P	P	P	P	P	P	P	P	P	P
1426223_at	284	191	294	267	260	411	351	437	371	365	900	1189	396		2810439F02Rik	RIKEN cDNA 2810439F02 gene	P	A	P	A	A	P	A	P	P	P	P	P	P
1441380_at	29	114	71	72	76	148	130	208	132	139	359	366	239		2810439F02Rik	RIKEN cDNA 2810439F02 gene	A	P	P	P	P	P	P	P	P	P	P	P	P
1446769_at	36	70	95	66	73	178	128	208	121	90	229	235	143		2810439F02Rik	RIKEN cDNA 2810439F02 gene	A	P	A	A	A	P	P	P	A	A	P	P	P
1426217_at	396	124	233	172	121	134	231	143	158	265	101	33	224		2810441K11Rik	RIKEN cDNA 2810441K11 gene	P	A	P	A	A	A	P	P	P	P	A	A	P
1429220_at	233	156	257	320	302	322	331	404	308	343	242	240	403		2810443J12Rik	RIKEN cDNA 2810443J12 gene	P	P	P	P	P	P	P	P	P	P	P	P	P
1428175_at	209	1271	1048	478	1007	956	510	736	459	430	440	228	375		2810446P07Rik	RIKEN cDNA 2810446P07 gene	P	P	P	P	P	P	P	P	P	P	P	P	P
1441155_at	53	480	183	146	218	197	83	77	95	271	155	88	46		2810446P07Rik	RIKEN cDNA 2810446P07 gene	P	P	P	P	P	P	A	P	A	P	P	A	A
1453791_at	93	1036	719	539	425	320	127	84	86	108	27	55	57		2810449C10Rik	RIKEN cDNA 2810449C10 gene	P	P	P	P	P	P	P	P	A	P	A	A	P
1425830_a_at	636	610	838	723	679	1222	1164	1309	1082	708	786	864	1612		2810452K22Rik /// LOC640972	RIKEN cDNA 2810452K22 gene /// similar to cyclin-dependent kinase 2-interacting protein	P	P	P	P	P	P	P	P	P	P	P	P	P
1418389_at	173	223	327	203	195	210	378	313	332	282	340	318	238		2810453I06Rik	RIKEN cDNA 2810453I06 gene	P	P	P	P	P	P	P	P	P	P	P	P	P
1451975_at	359	479	469	399	380	1242	1389	774	800	822	435	376	526		2810453I06Rik	RIKEN cDNA 2810453I06 gene	P	P	P	P	P	P	P	P	P	P	P	P	P
1428499_at	260	175	232	356	296	688	739	866	946	349	246	328	661		2810454L23Rik	RIKEN cDNA 2810454L23 gene	P	P	P	P	P	P	P	P	P	P	P	P	P
1429096_at	428	2149	2062	2972	4305	235	230	249	232	714	340	392	665		2810455D13Rik	RIKEN cDNA 2810455D13 gene	P	P	P	P	P	P	P	P	P	P	P	P	P
1435947_at	1364	3579	2893	4316	5337	313	334	215	710	765	754	962	1052		2810455D13Rik	RIKEN cDNA 2810455D13 gene	P	P	P	P	P	P	P	P	P	P	P	P	P
1429475_at	292	208	231	174	242	559	666	186	376	243	106	163	335		2810457I06Rik	RIKEN cDNA 2810457I06 gene	P	P	P	P	A	P	P	P	P	P	A	P	P
1452354_at	1793	2285	3216	2153	1324	161	193	328	193	1260	285	103	266		2810459M11Rik	RIKEN cDNA 2810459M11 gene	P	P	P	P	P	P	P	P	P	P	P	A	P
1452980_at	347	442	882	776	502	154	233	507	347	4811	9337	14839	1134		2810468N07Rik	RIKEN cDNA 2810468N07 gene	P	P	P	P	P	P	P	P	P	P	P	P	P
1429588_at	936	518	284	284	288	235	265	249	245	438	236	229	195		2810474O19Rik	RIKEN cDNA 2810474O19 gene	P	P	P	P	P	P	P	P	P	P	P	A	P
1437110_at	947	305	296	383	275	167	255	207	283	579	259	233	183		2810474O19Rik	RIKEN cDNA 2810474O19 gene	P	P	P	P	P	P	P	P	P	P	P	P	P
1435754_at	809	1041	1008	1068	1172	3954	2696	3204	2133	868	610	812	3156		2810482G21Rik	RIKEN cDNA 2810482G21 gene	P	P	P	P	P	P	P	P	P	P	P	P	P
1446244_at	275	646	379	758	951	998	958	1192	999	407	294	292	2192		2810482G21Rik	RIKEN cDNA 2810482G21 gene	P	P	P	P	P	P	P	P	P	P	P	P	P
1428624_at	3239	8405	6414	6051	6059	323	479	289	1045	2085	4497	6852	2010		2810482I07Rik	RIKEN cDNA 2810482I07 gene	P	P	P	P	P	P	P	P	P	P	P	P	P
1426985_s_at	1081	4879	1727	1656	1270	1891	1018	576	957	2373	1990	1871	1073		2810485I05Rik	RIKEN cDNA 2810485I05 gene	P	P	P	P	P	P	P	P	P	P	P	P	P
1426986_at	275	856	600	371	581	296	178	275	237	408	469	504	190		2810485I05Rik	RIKEN cDNA 2810485I05 gene	A	P	P	P	P	P	P	P	A	P	P	P	P
1452268_at	580	3411	1106	958	1115	1281	573	468	740	1203	1277	1251	844		2810485I05Rik	RIKEN cDNA 2810485I05 gene	P	P	P	P	P	P	P	P	P	P	P	P	P
1429068_at	30	139	76	80	88	70	47	61	64	260	251	191	126		2810488G03Rik	RIKEN cDNA 2810488G03 gene	A	P	P	P	A	P	A	P	A	P	P	P	P
1423958_a_at	1981	729	1151	1327	1526	1883	1863	2586	2490	2060	1321	1997	2367		2900001O04Rik	RIKEN cDNA 2900001O04 gene	P	P	P	P	P	P	P	P	P	P	P	P	P
1429013_at	1163	541	271	908	1400	4037	3303	6428	4524	1954	1451	2553	5609		2900002G04Rik	RIKEN cDNA 2900002G04 gene	P	P	P	P	P	P	P	P	P	P	P	P	P
1431403_a_at	105	56	36	139	120	465	437	556	829	242	179	300	1048		2900002G04Rik	RIKEN cDNA 2900002G04 gene	P	P	A	P	P	P	P	P	P	P	P	P	P
1447852_x_at	1613	826	743	997	999	546	721	1441	1142	827	1010	1420	1739		2900002H16Rik	RIKEN cDNA 2900002H16 gene	P	P	P	P	P	P	P	P	P	P	P	P	P
1450449_a_at	1594	415	747	1326	1227	268	565	913	1357	1068	962	1667	1128		2900002H16Rik	RIKEN cDNA 2900002H16 gene	P	P	P	P	P	P	P	P	P	P	P	P	P
1432431_s_at	173	395	667	381	387	751	1243	542	358	693	647	689	429		2900006F19Rik	RIKEN cDNA 2900006F19 gene	P	P	P	P	P	P	P	P	P	P	P	P	P
1453025_at	78	283	221	145	140	573	613	356	239	234	273	244	269		2900006F19Rik	RIKEN cDNA 2900006F19 gene	P	P	P	P	P	P	P	P	P	P	P	P	P
1430769_s_at	1000	422	826	986	741	921	918	1140	1107	930	682	1122	771		2900009I07Rik	RIKEN cDNA 2900009I07 gene	P	P	P	P	P	P	P	P	P	P	P	P	P
1445606_a_at	36	45	24	24	24	294	243	181	126	32	24	53	128		2900009J06Rik	RIKEN cDNA 2900009J06 gene	A	A	A	A	A	P	A	P	A	A	A	A	A
1428978_at	152	319	283	344	322	1387	920	1241	1030	428	406	578	1560		2900009J20Rik	RIKEN cDNA 2900009J20 gene	P	P	P	P	P	P	P	P	P	P	P	P	P
1452989_at	229	655	360	650	513	2214	1151	1420	1259	714	727	1029	2342		2900009J20Rik	RIKEN cDNA 2900009J20 gene	P	P	P	P	P	P	P	P	P	P	P	P	P
1433480_at	2037	1027	1884	1303	1207	916	1910	2581	1776	1328	1773	1646	1852		2900010J23Rik	RIKEN cDNA 2900010J23 gene	P	P	P	P	P	P	P	P	P	P	P	P	P
1436810_x_at	445	379	419	404	433	394	422	614	353	382	339	302	425		2900010M23Rik	RIKEN cDNA 2900010M23 gene	A	A	P	P	A	A	P	P	A	P	A	A	A
1448685_at	2614	1124	2301	1871	1542	908	2447	1846	1934	2501	2492	1705	1956		2900010M23Rik	RIKEN cDNA 2900010M23 gene	P	P	P	P	P	P	P	P	P	P	P	P	P
1432757_at	17	3195	304	319	415	228	62	74	93	339	365	181	77		2900011L18Rik	RIKEN cDNA 2900011L18 gene	A	P	P	P	P	P	A	A	A	P	P	P	A
1424624_at	2392	236	437	522	428	3256	5717	6619	5162	2543	1445	791	2735		2900011O08Rik	RIKEN cDNA 2900011O08 gene	P	P	P	P	P	P	P	P	P	P	P	P	P
1430073_at	175	1067	687	1168	896	164	271	266	343	644	152	77	366		2900016B01Rik	RIKEN cDNA 2900016B01 gene	P	P	P	P	P	P	P	P	P	P	P	A	P
1433040_at	48	71	34	60	57	63	42	57	46	224	84	39	23		2900018E21Rik	RIKEN cDNA 2900018E21 gene	P	A	A	A	A	P	P	P	A	P	P	A	A
1430348_at	56	200	108	225	274	271	242	382	222	157	95	75	332		2900019E01Rik	RIKEN cDNA 2900019E01 gene	A	P	P	P	P	P	P	P	P	P	P	A	P
1438194_at	6280	20807	26226	49288	40238	2226	2114	6535	6686	4510	1278	1170	18755		2900019G14Rik	RIKEN cDNA 2900019G14 gene	P	P	P	P	P	P	P	P	P	P	P	P	P
1439940_at	765	2068	4162	11575	18336	384	170	822	1136	507	171	74	1425		2900019G14Rik	RIKEN cDNA 2900019G14 gene	P	P	P	P	P	P	P	P	P	P	P	A	P
1457800_at	459	3746	9123	20768	15088	174	311	451	321	287	133	127	2499		2900019G14Rik	RIKEN cDNA 2900019G14 gene	P	P	P	P	P	P	P	P	P	P	P	P	P
1459014_at	79	362	1100	2155	1639	13	34	9	41	50	9	13	308		2900019G14Rik	RIKEN cDNA 2900019G14 gene	A	P	P	P	P	A	A	A	A	A	A	A	P
1435293_at	1189	1206	993	1212	848	4101	3670	4045	4257	4629	3885	4554	3629		2900022I03Rik	RIKEN cDNA 2900022I03 gene	P	P	P	P	P	P	P	P	P	P	P	P	P
1429503_at	325	780	724	555	493	1324	1735	1740	1579	1655	1566	1979	1689		2900024C23Rik	RIKEN cDNA 2900024C23 gene	P	P	P	P	P	P	P	P	P	P	P	P	P
1437261_at	149	372	379	347	553	1610	1240	1014	939	404	368	441	813		2900024O10Rik	RIKEN cDNA 2900024O10 gene	P	P	P	P	P	P	P	P	P	P	P	P	P
1437704_at	385	549	696	959	1094	1473	2199	1803	1458	1132	862	891	1187		2900024O10Rik	RIKEN cDNA 2900024O10 gene	P	P	P	P	P	P	P	P	P	P	P	P	P
1429089_s_at	1331	608	500	541	325	2297	2411	1607	2673	56	25	25	1798		2900026A02Rik	RIKEN cDNA 2900026A02 gene	P	A	P	P	A	P	P	P	P	A	A	A	P
1435315_s_at	980	2084	1230	1445	2028	1801	1194	1306	1405	2913	3335	4516	2610		2900034E22Rik	RIKEN cDNA 2900034E22 gene	P	P	P	P	P	P	P	P	P	P	P	P	P
1452766_at	38	5	28	53	36	843	789	4761	3440	697	8923	15353	5321		2900041A09Rik	RIKEN cDNA 2900041A09 gene	A	A	A	A	A	P	P	P	P	P	P	P	P
1453016_at	1666	753	969	866	812	994	838	857	615	768	2288	2385	1118		2900042B11Rik	RIKEN cDNA 2900042B11 gene	P	P	P	P	P	P	P	P	P	P	P	P	P
1429023_at	1148	565	1505	2765	2426	31	21	37	41	682	288	1296	125		2900042E01Rik	RIKEN cDNA 2900042E01 gene	P	P	P	P	P	A	A	A	A	P	P	P	P
1434727_at	1928	2904	3975	9171	8857	80	55	77	107	2493	533	2110	866		2900042E01Rik	RIKEN cDNA 2900042E01 gene	P	P	P	P	P	A	A	A	A	P	P	P	P
1443707_at	89	187	78	68	75	303	228	283	149	103	64	162	91		2900046B09Rik	RIKEN cDNA 2900046B09 gene	A	A	A	A	A	P	P	P	P	A	A	P	A
1426729_at	343	256	226	353	444	927	1146	2050	1660	342	153	116	1079		2900046G09Rik	RIKEN cDNA 2900046G09 gene	P	P	A	P	P	P	P	P	P	P	A	A	P
1432011_at	171	213	228	214	298	143	116	169	67	320	289	419	205		2900052L18Rik	RIKEN cDNA 2900052L18 gene	P	P	P	P	P	A	P	P	P	P	P	P	P
1457495_at	30	127	184	1109	1319	27	17	6	23	17	9	28	150		2900052N01Rik	RIKEN cDNA 2900052N01 gene	A	P	P	P	P	A	A	A	A	A	A	A	P
1436231_at	307	1676	1596	7636	6969	12	29	8	26	16	32	64	807		2900052N01Rik	RIKEN cDNA 2900052N01 gene	P	P	P	P	P	A	A	A	A	A	A	P	P
1429583_at	310	118	240	245	267	299	239	336	266	199	433	586	299		2900053A13Rik	RIKEN cDNA 2900053A13 gene	P	P	P	P	P	P	P	P	P	P	P	P	P
1453207_at	960	286	605	634	461	446	680	959	698	613	950	1257	643		2900053A13Rik	RIKEN cDNA 2900053A13 gene	P	P	P	P	P	P	P	P	P	P	P	P	P
1429625_at	652	311	226	170	197	6578	2818	5578	4061	1353	561	1207	6308		2900054C01Rik	RIKEN cDNA 2900054C01 gene	P	P	P	P	P	P	P	P	P	P	P	P	P
1452872_at	83	135	55	42	28	4880	3439	2474	2029	1462	4257	7984	3750		2900054D09Rik	RIKEN cDNA 2900054D09 gene	P	P	P	P	A	P	P	P	P	P	P	P	P
1430675_at	17	47	31	32	38	552	630	955	540	118	88	35	424		2900055J20Rik	RIKEN cDNA 2900055J20 gene	A	A	A	A	A	P	P	P	P	A	P	A	P
1444062_at	96	133	69	46	93	640	531	631	520	179	158	222	598		2900056L01Rik	RIKEN cDNA 2900056L01 gene	P	A	A	A	A	P	P	P	P	P	P	P	P
1438575_a_at	272	562	276	501	563	2212	808	1204	1057	236	287	365	1369		2900056M20Rik	RIKEN cDNA 2900056M20 gene	P	P	P	P	P	P	P	P	P	P	P	P	P
1427190_at	251	268	257	234	203	711	336	382	301	411	307	355	368		2900057D21Rik	RIKEN cDNA 2900057D21 gene	P	P	P	P	P	P	P	P	P	P	P	P	P
1436116_x_at	160	375	240	102	257	783	456	1218	547	209	138	127	887		2900057D21Rik	RIKEN cDNA 2900057D21 gene	P	P	P	P	P	P	P	P	P	P	P	P	P
1444478_at	436	481	263	396	410	2293	536	1459	547	573	387	276	2002		2900057D21Rik	RIKEN cDNA 2900057D21 gene	P	P	P	P	P	P	P	P	P	P	P	P	P
1455159_at	1058	2849	1609	1320	1161	4590	2952	2446	1829	3016	2045	1231	2710		2900057D21Rik	RIKEN cDNA 2900057D21 gene	P	P	P	P	P	P	P	P	P	P	P	P	P
1434207_at	261	221	192	149	136	308	281	474	296	207	174	93	413		2900057K09Rik	RIKEN cDNA 2900057K09 gene	P	P	P	A	A	P	P	P	P	P	A	A	P
1428333_at	3744	6440	10210	13240	12983	8243	6339	8365	5072	7493	4017	3065	5773		2900062L11Rik	RIKEN cDNA 2900062L11 gene	P	P	P	P	P	P	P	P	P	P	P	P	P
1417344_at	10912	7136	11210	14185	14653	4687	5045	6093	6550	8172	11726	16952	9777		2900064A13Rik	RIKEN cDNA 2900064A13 gene	P	P	P	P	P	P	P	P	P	P	P	P	P
1439817_at	620	768	952	1486	1498	733	940	1335	1415	518	431	232	1534		2900064A13Rik	RIKEN cDNA 2900064A13 gene	P	P	P	P	P	P	P	P	P	P	P	P	P
1432813_at	53	153	192	118	174	686	305	553	504	356	166	65	1144		2900064F13Rik	RIKEN cDNA 2900064F13 gene	P	P	P	P	P	P	P	P	P	P	P	A	P
1460531_at	50	252	78	135	81	27	32	22	5	119	133	229	16		2900069M18Rik	RIKEN cDNA 2900069M18 gene	A	P	P	P	A	A	A	A	A	A	P	P	A
1420820_at	14778	7498	2800	2502	2536	298	2325	906	6979	2385	3451	4290	1649		2900073G15Rik	RIKEN cDNA 2900073G15 gene	P	P	P	P	P	P	P	P	P	P	P	P	P
1450013_at	1374	536	237	319	377	134	148	161	357	188	293	345	281		2900073G15Rik	RIKEN cDNA 2900073G15 gene	P	P	P	P	P	P	A	P	P	P	P	P	P
1424079_x_at	352	206	299	308	305	250	316	463	425	392	724	907	295		2900073H19Rik	RIKEN cDNA 2900073H19 gene	P	A	A	A	A	A	P	A	P	P	P	P	P
1431752_a_at	268	117	269	229	218	234	326	335	309	357	562	791	230		2900073H19Rik	RIKEN cDNA 2900073H19 gene	P	A	P	P	P	P	P	P	P	P	P	P	P
1431753_x_at	179	82	214	199	186	160	256	248	252	246	575	771	167		2900073H19Rik	RIKEN cDNA 2900073H19 gene	A	A	A	A	A	A	A	P	A	P	P	P	A
1437227_at	122	133	123	153	192	154	161	193	184	242	307	260	93		2900073H19Rik	RIKEN cDNA 2900073H19 gene	P	P	P	P	P	P	P	P	P	P	P	P	P
1435400_at	113	315	306	154	273	655	864	2237	926	335	320	340	829		2900075B16Rik	RIKEN cDNA 2900075B16 gene	P	P	P	P	P	P	P	P	P	P	P	P	P
1436135_at	201	1067	1235	878	723	3718	1414	1298	954	2755	1693	493	940		2900075N08Rik	RIKEN cDNA 2900075N08 gene	P	P	P	P	P	P	P	P	P	P	P	P	P
1453756_at	19	90	122	55	116	243	161	97	111	275	156	61	98		2900075N08Rik	RIKEN cDNA 2900075N08 gene	A	A	A	A	A	A	A	A	A	P	A	A	A
1453419_at	580	705	1787	2188	2781	446	264	505	558	496	283	239	419		2900078C09Rik	RIKEN cDNA 2900078C09 gene	P	P	P	P	P	P	P	P	P	P	P	A	P
1429211_at	421	3339	3222	4240	5905	9061	4834	7025	3815	3134	4303	1512	7891		2900078E11Rik	RIKEN cDNA 2900078E11 gene	P	P	P	P	P	P	P	P	P	P	P	P	P
1439048_at	526	5139	5202	10233	12014	9544	7365	6327	5634	6987	9288	4064	11150		2900078E11Rik	RIKEN cDNA 2900078E11 gene	P	P	P	P	P	P	P	P	P	P	P	P	P
1421472_at	46	122	30	68	91	312	329	222	227	233	85	61	131		2900083I11Rik	RIKEN cDNA 2900083I11 gene	A	P	A	P	A	P	P	P	P	P	P	P	P
1457087_at	11	19	8	11	22	186	349	313	252	492	70	10	116		2900083I11Rik	RIKEN cDNA 2900083I11 gene	A	A	A	A	A	P	P	P	P	P	A	A	P
1424790_at	331	332	718	681	822	298	214	408	505	370	189	226	224		2900084M01Rik	RIKEN cDNA 2900084M01 gene	P	P	P	P	P	P	P	P	P	P	P	P	P
1453456_at	22	434	272	371	384	70	88	136	90	307	182	44	68		2900084O13Rik	RIKEN cDNA 2900084O13 gene	A	P	P	P	P	A	A	A	A	P	P	A	A
1435788_at	837	1093	1375	1547	1648	4099	3358	4218	3169	1450	1592	1156	2733		2900086B20Rik	RIKEN cDNA 2900086B20 gene	P	P	P	P	P	P	P	P	P	P	P	P	P
1429857_at	309	687	623	574	928	505	301	198	209	623	245	317	231		2900092D14Rik	RIKEN cDNA 2900092D14 gene	P	P	P	P	P	P	P	P	P	P	A	P	P
1424014_at	233	284	347	234	208	197	367	348	359	446	331	390	284		2900092E17Rik	RIKEN cDNA 2900092E17 gene	P	P	P	P	P	P	P	P	P	P	P	P	P
1449618_s_at	677	757	844	799	719	683	879	1226	1074	1333	1082	1423	905		2900092E17Rik	RIKEN cDNA 2900092E17 gene	P	P	P	P	P	P	P	P	P	P	P	P	P
1429113_at	53	100	60	47	51	971	991	1407	979	108	19	38	630		2900092E17Rik /// 1500031I19Rik	RIKEN cDNA 2900092E17 gene /// RIKEN cDNA 1500031I19 gene	A	A	A	A	A	P	P	P	P	A	A	A	P
1419118_at	263	341	121	116	48	860	958	983	807	2325	429	141	604		2900093B09Rik	RIKEN cDNA 2900093B09 gene	P	P	P	P	A	P	P	P	P	P	P	P	P
1433613_at	5016	7109	5498	6343	6762	3097	2464	2088	3384	5217	8737	7971	3521		3 days neonate thymus cDNA, RIKEN full-length enriched library, clone:A630012F14 product:unclassifiable, full insert sequence	3 days neonate thymus cDNA, RIKEN full-length enriched library, clone:A630012F14 product:unclassifiable, full insert sequence	P	P	P	P	P	P	P	P	P	P	P	P	P
1438907_at	204	393	237	243	275	324	147	106	115	203	539	284	263		3 days neonate thymus cDNA, RIKEN full-length enriched library, clone:A630033C13 product:unclassifiable, full insert sequence	3 days neonate thymus cDNA, RIKEN full-length enriched library, clone:A630033C13 product:unclassifiable, full insert sequence	P	P	P	P	A	P	A	P	A	P	P	A	P
1443966_at	188	252	306	197	202	432	407	641	340	319	300	375	226		3 days neonate thymus cDNA, RIKEN full-length enriched library, clone:A630040N16 product:unclassifiable, full insert sequence	3 days neonate thymus cDNA, RIKEN full-length enriched library, clone:A630040N16 product:unclassifiable, full insert sequence	P	P	P	P	P	P	P	P	P	P	P	P	P
1431997_at	2190	1364	1557	1713	2289	1486	1512	4189	2140	721	871	1114	2884		3000002C10Rik	RIKEN cDNA 3000002C10 gene	P	P	P	P	P	P	P	P	P	P	P	P	P
1430088_at	194	491	277	245	295	276	173	199	203	365	255	230	233		3000002G13Rik	RIKEN cDNA 3000002G13 gene	P	P	P	P	P	P	P	P	P	P	P	P	P
1453226_at	323	169	189	79	136	73	98	170	91	554	81	46	123		3000004C01Rik	RIKEN cDNA 3000004C01 gene	P	P	P	A	A	A	A	P	P	P	P	A	P
1452134_at	508	279	589	564	596	215	394	903	502	466	394	451	294		3010001K23Rik	RIKEN cDNA 3010001K23 gene	P	A	P	P	P	A	P	P	P	P	P	P	P
1453620_at	23	111	68	46	38	302	153	116	112	314	119	15	37		3010022N24Rik	RIKEN cDNA 3010022N24 gene	A	A	A	A	A	P	A	A	A	P	A	A	A
1448930_at	77	57	144	53	26	130	289	276	170	230	119	150	114		3010026O09Rik	RIKEN cDNA 3010026O09 gene	A	A	A	A	A	A	P	P	A	P	A	A	A
1453782_at	9	11	7	16	15	12	23	302	243	3	5	9	467		3021401C12Rik	RIKEN cDNA 3021401C12 gene	A	A	A	A	A	A	P	A	P	A	A	A	P
1427174_at	351	626	553	450	1030	131	206	706	405	251	178	49	549		3100002L24Rik /// 9230108I15Rik /// LOC329575 /// LOC626832 /// LOC627914 /// LOC628147 /// LOC665043 /// LOC665078 /// LOC665211 /// LOC668030 /// LOC668039 /// LOC668066	RIKEN cDNA 3100002L24 gene /// RIKEN cDNA 9230108I15 gene /// hypothetical LOC329575 /// similar to gonadotropin inducible ovarian transcription factor 1 /// similar to zinc finger protein 709 /// similar to zinc finger protein 709 /// similar to zinc finger protein 709 /// similar to zinc finger protein 709 /// similar to zinc finger protein 709 /// similar to gonadotropin inducible ovarian tran…	P	P	P	P	P	P	P	P	P	P	P	A	P
1447977_x_at	170	151	133	132	257	286	177	449	403	221	135	59	391		3100002L24Rik /// 9230108I15Rik /// LOC626832 /// LOC627914 /// LOC628147 /// LOC665043 /// LOC665078 /// LOC668030 /// LOC668039 /// LOC668066	RIKEN cDNA 3100002L24 gene /// RIKEN cDNA 9230108I15 gene /// similar to gonadotropin inducible ovarian transcription factor 1 /// similar to zinc finger protein 709 /// similar to zinc finger protein 709 /// similar to zinc finger protein 709 /// similar to zinc finger protein 709 /// similar to gonadotropin inducible ovarian transcription factor 1 /// similar to zinc finger protein 97 /// simil…	P	P	P	P	P	P	P	P	P	P	P	A	P
1438299_at	178	426	184	335	439	138	174	265	161	446	333	235	235		3100002L24Rik /// 9230108I15Rik /// LOC626832 /// LOC628147 /// LOC665043 /// LOC665078 /// LOC668039	RIKEN cDNA 3100002L24 gene /// RIKEN cDNA 9230108I15 gene /// similar to gonadotropin inducible ovarian transcription factor 1 /// similar to zinc finger protein 709 /// similar to zinc finger protein 709 /// similar to zinc finger protein 709 /// similar to zinc finger protein 97	A	P	P	P	P	P	A	P	A	P	P	A	P
1426558_x_at	6592	6281	7143	6383	8546	4234	4635	7560	4329	3761	4230	3128	6856		3100002L24Rik /// LOC627901 /// 0610010B08Rik /// LOC628084 /// LOC628147 /// LOC668030 /// LOC668039 /// LOC668066	RIKEN cDNA 3100002L24 gene /// similar to zinc finger protein 14 /// RIKEN cDNA 0610010B08 gene /// similar to zinc finger protein 91 /// similar to zinc finger protein 709 /// similar to gonadotropin inducible ovarian transcription factor 1 /// similar to zinc finger protein 97 /// similar to gonadotropin inducible ovarian transcription factor 1	P	P	P	P	P	P	P	P	P	P	P	P	P
1415739_at	2307	1442	2258	2620	1861	1947	3693	1980	2272	3475	3231	3347	1505		3100004P22Rik	RIKEN cDNA 3100004P22 gene	P	P	P	P	P	P	P	P	P	P	P	P	P
1460641_a_at	388	250	278	246	242	276	506	387	412	449	457	410	171		3100004P22Rik /// 2310022K01Rik	RIKEN cDNA 3100004P22 gene /// RIKEN cDNA 2310022K01 gene	P	A	P	P	A	A	A	P	P	P	P	P	A
1416892_s_at	5522	7640	5127	4967	4936	1913	1225	443	1170	399	10948	9589	1789		3110001A13Rik	RIKEN cDNA 3110001A13 gene	P	P	P	P	P	P	P	P	P	P	P	P	P
1416893_at	118	122	195	168	122	18	84	8	53	44	564	304	36		3110001A13Rik	RIKEN cDNA 3110001A13 gene	P	P	P	P	P	A	A	P	A	A	P	P	A
1448509_at	1291	1946	1364	1092	1100	362	497	122	359	168	4096	2506	308		3110001A13Rik	RIKEN cDNA 3110001A13 gene	P	P	P	P	P	P	A	P	P	A	P	P	P
1423317_at	4189	1684	2666	2593	2684	3221	3272	3852	3593	3892	3353	3175	2635		3110001D03Rik	RIKEN cDNA 3110001D03 gene	P	P	P	P	P	P	P	P	P	P	P	P	P
1450642_at	2778	2949	2484	2055	3088	3789	2481	3213	1961	2284	13372	19454	4953		3110001I20Rik	RIKEN cDNA 3110001I20 gene	P	P	P	P	P	P	P	P	P	P	P	P	P
1456120_at	204	315	152	285	286	316	154	194	160	222	2354	4023	402		3110001I20Rik	RIKEN cDNA 3110001I20 gene	P	P	P	P	P	P	P	P	P	P	P	P	P
1429165_at	209	212	141	259	254	191	138	186	294	370	185	183	186		3110001I22Rik	RIKEN cDNA 3110001I22 gene	P	P	P	P	P	P	P	P	A	P	P	A	P
1437654_at	207	193	177	219	206	85	102	125	100	165	210	246	206		3110001K24Rik	RIKEN cDNA 3110001K24 gene	A	A	A	P	A	P	A	A	A	A	A	P	A
1456716_s_at	369	302	350	455	595	303	349	426	298	275	427	568	341		3110002H16Rik	RIKEN cDNA 3110002H16 gene	P	P	P	P	P	P	P	P	P	P	P	P	P
1426964_at	1657	1004	526	256	142	2190	2055	1192	1431	1109	665	189	1102		3110003A17Rik	RIKEN cDNA 3110003A17 gene	P	P	P	P	A	P	P	P	P	P	P	P	P
1439932_at	209	213	220	192	253	360	323	616	323	276	158	152	585		3110003A22Rik	RIKEN cDNA 3110003A22 gene	P	P	P	P	P	P	P	P	P	P	P	P	P
1449122_at	184	170	236	202	250	142	164	207	164	357	213	106	231		3110003A22Rik	RIKEN cDNA 3110003A22 gene	P	P	P	P	P	P	P	P	P	P	P	P	P
1453004_at	2525	2170	2261	1968	1891	1058	1604	906	984	3183	7922	7023	947		3110004L20Rik	RIKEN cDNA 3110004L20 gene	P	P	P	P	P	P	P	P	P	P	P	P	P
1424732_s_at	411	170	261	274	252	241	282	369	317	255	380	703	206		3110005G23Rik	RIKEN cDNA 3110005G23 gene	P	P	P	P	P	P	P	P	P	P	P	P	P
1453052_at	751	276	406	395	298	442	406	532	441	372	498	1078	391		3110005G23Rik	RIKEN cDNA 3110005G23 gene	P	A	P	P	A	P	P	P	P	P	P	P	P
1452779_at	87	141	200	327	456	5277	4133	4731	4203	1284	443	62	2937		3110006E14Rik	RIKEN cDNA 3110006E14 gene	A	A	P	P	P	P	P	P	P	P	P	A	P
1439279_at	395	1470	934	746	710	780	566	194	297	1018	1147	1874	296		3110007F17Rik	RIKEN cDNA 3110007F17 gene	P	P	P	P	P	P	P	P	A	P	P	P	P
1428023_at	143	123	132	123	151	163	146	104	82	344	268	261	142		3110009E18Rik	RIKEN cDNA 3110009E18 gene	P	P	P	P	P	P	P	P	P	P	P	P	P
1445708_x_at	307	871	312	441	588	207	63	333	116	263	215	348	469		3110021A11Rik	RIKEN cDNA 3110021A11 gene	P	P	P	P	P	A	A	A	A	A	A	P	P
1424533_a_at	770	656	560	642	735	470	435	561	420	670	716	464	474		3110023B02Rik	RIKEN cDNA 3110023B02 gene	P	P	P	P	P	P	P	P	P	P	P	P	P
1418902_at	861	309	790	767	481	730	878	1074	847	510	552	286	712		3110023E09Rik	RIKEN cDNA 3110023E09 gene	P	P	P	P	P	P	P	P	P	P	P	P	P
1449267_at	1069	178	748	904	566	539	844	859	792	475	452	265	447		3110023E09Rik	RIKEN cDNA 3110023E09 gene	P	P	P	P	P	P	P	P	P	P	P	P	P
1447703_x_at	504	426	328	248	255	410	627	682	454	262	421	315	344		3110024A21Rik	RIKEN cDNA 3110024A21 gene	P	P	P	P	P	P	P	P	P	P	P	P	P
1449946_a_at	201	249	165	146	125	154	174	140	116	243	272	204	81		3110024A21Rik	RIKEN cDNA 3110024A21 gene	P	P	P	P	P	P	P	P	P	P	P	P	A
1430252_at	69	375	147	95	90	493	372	325	247	171	409	477	256		3110027N22Rik	RIKEN cDNA 3110027N22 gene	A	P	P	P	P	P	P	P	P	P	P	P	P
1420507_a_at	666	344	351	380	492	168	135	249	261	197	164	181	193		3110031B13Rik	RIKEN cDNA 3110031B13 gene	P	P	P	P	P	P	P	P	P	P	P	P	P
1435696_s_at	716	746	617	772	859	320	308	315	321	470	275	198	428		3110031B13Rik	RIKEN cDNA 3110031B13 gene	P	P	P	P	P	P	P	P	P	P	P	P	P
1441881_x_at	353	158	148	60	207	180	228	333	512	101	114	110	269		3110032G18Rik	RIKEN cDNA 3110032G18 gene	P	A	P	A	P	P	P	P	P	A	A	A	P
1428184_at	1001	217	551	650	150	2312	2332	10222	7362	18091	14549	677	8451		3110035E14Rik	RIKEN cDNA 3110035E14 gene	P	P	P	P	P	P	P	P	P	P	P	P	P
1428903_at	461	266	347	329	283	348	347	264	312	869	561	275	514		3110037I16Rik	RIKEN cDNA 3110037I16 gene	P	P	P	P	P	P	P	P	P	P	P	P	P
1440204_at	412	354	156	190	161	492	325	272	177	116	42	15	269		3110039M20Rik	RIKEN cDNA 3110039M20 gene	P	P	P	P	A	P	P	P	P	P	A	A	P
1450972_at	419	235	180	171	235	410	440	405	345	237	223	209	399		3110040N11Rik	RIKEN cDNA 3110040N11 gene	P	P	P	P	P	P	P	P	P	P	P	P	P
1430478_at	42	46	39	61	27	27	21	17	6	1681	311	60	24		3110043A19Rik	RIKEN cDNA 3110043A19 gene	A	A	P	P	A	A	A	A	A	P	P	A	A
1428468_at	906	1521	1354	1308	1371	2636	2032	1483	1516	1149	1886	2199	1707		3110043O21Rik	RIKEN cDNA 3110043O21 gene	P	P	P	P	P	P	P	P	P	P	P	P	P
1425267_a_at	174	15	75	81	100	20	162	24	524	39	27	15	106		3110045G13Rik	RIKEN cDNA 3110045G13 gene	P	A	A	A	A	A	A	P	P	A	A	A	A
1425268_a_at	116	83	42	77	65	9	140	75	283	34	32	72	87		3110045G13Rik	RIKEN cDNA 3110045G13 gene	A	A	A	A	A	A	A	A	P	A	A	A	A
1460482_at	4	12	17	39	25	4033	3224	2188	1623	179	30	16	1890		3110047P20Rik	RIKEN cDNA 3110047P20 gene	A	A	A	A	A	P	P	P	P	P	A	A	P
1448678_at	511	1319	460	346	228	794	999	711	1051	659	500	383	538		3110048E14Rik	RIKEN cDNA 3110048E14 gene	P	P	P	P	P	P	P	P	P	P	P	P	P
1430568_at	275	457	482	361	399	776	741	383	613	379	294	238	534		3110050K21Rik	RIKEN cDNA 3110050K21 gene	P	P	P	P	P	P	P	P	P	P	P	P	P
1434894_at	285	231	217	211	218	381	438	290	344	284	217	267	346		3110050K21Rik	RIKEN cDNA 3110050K21 gene	P	P	P	P	P	P	P	P	P	P	P	P	P
1445499_at	409	855	477	521	606	611	819	503	769	599	531	489	947		3110050K21Rik	RIKEN cDNA 3110050K21 gene	P	P	P	P	P	P	P	P	P	P	P	P	P
1428416_at	2781	951	901	634	595	7581	4294	3726	2735	794	479	444	4065		3110050N22Rik	RIKEN cDNA 3110050N22 gene	P	P	P	P	P	P	P	P	P	P	P	P	P
1428417_at	862	280	216	194	80	1458	487	254	327	356	339	179	351		3110050N22Rik	RIKEN cDNA 3110050N22 gene	P	P	P	P	P	P	P	P	P	P	P	P	P
1428418_s_at	1331	471	373	401	250	2102	826	602	665	746	629	435	684		3110050N22Rik	RIKEN cDNA 3110050N22 gene	P	P	P	P	P	P	P	P	P	P	P	P	P
1440992_at	149	275	302	293	277	653	343	261	217	249	182	196	198		3110052M02Rik	RIKEN cDNA 3110052M02 gene	P	P	P	P	P	P	P	P	P	P	P	P	P
1434658_at	598	1024	1657	1180	798	894	1480	841	799	3012	2197	2548	625		3110056O03Rik	RIKEN cDNA 3110056O03 gene	P	P	P	P	A	P	P	P	P	P	P	P	A
1429966_at	85	99	130	252	211	226	189	271	223	491	253	252	235		3110057O12Rik	RIKEN cDNA 3110057O12 gene	A	P	P	P	P	P	P	P	P	P	P	P	P
1455475_at	65	89	117	303	365	133	98	158	138	219	182	338	118		3110057O12Rik	RIKEN cDNA 3110057O12 gene	A	A	P	P	P	P	P	P	A	P	P	P	P
1428600_at	359	723	644	545	467	580	561	517	682	1297	1002	494	602		3110068G20Rik	RIKEN cDNA 3110068G20 gene	P	P	P	P	P	P	P	P	P	P	P	P	P
1429771_at	2767	2892	1633	1939	1905	7123	3907	4807	4174	3169	3128	3356	5281		3110073H01Rik	RIKEN cDNA 3110073H01 gene	P	P	P	P	P	P	P	P	P	P	P	P	P
1453007_at	907	686	784	334	305	1028	671	594	509	451	356	284	663		3110082I17Rik	RIKEN cDNA 3110082I17 gene	P	P	P	P	P	P	P	P	P	P	P	A	P
1435391_at	262	741	363	294	302	704	397	278	327	958	570	241	171		3200001K10Rik	RIKEN cDNA 3200001K10 gene	P	P	P	P	P	P	P	P	P	P	P	P	P
1455430_at	446	939	871	595	564	713	944	485	614	1051	642	650	421		3200001K10Rik	RIKEN cDNA 3200001K10 gene	P	P	P	P	P	P	P	P	P	P	P	P	P
1424327_at	668	609	576	365	360	306	364	229	226	260	397	411	290		3200002M19Rik	RIKEN cDNA 3200002M19 gene	P	P	P	P	P	P	P	P	P	P	P	P	P
1428734_at	186	176	215	118	175	175	204	264	149	125	185	160	159		3200002M19Rik	RIKEN cDNA 3200002M19 gene	P	P	P	P	P	P	P	P	P	P	P	P	P
1428895_at	324	1633	2666	2867	2169	10	37	30	130	1119	555	200	410		3222401M22Rik	RIKEN cDNA 3222401M22 gene	P	P	P	P	P	A	A	A	P	P	P	P	P
1452946_a_at	427	968	1917	1797	1574	40	83	86	167	905	445	528	325		3222401M22Rik	RIKEN cDNA 3222401M22 gene	P	P	P	P	P	A	A	A	A	P	P	P	P
1437869_at	286	584	345	674	933	302	262	178	221	717	1845	2355	340		3222402P14Rik	RIKEN cDNA 3222402P14 gene	P	P	P	P	P	P	P	P	P	P	P	P	P
1455091_at	281	478	560	663	869	286	345	160	169	569	1619	1732	271		3222402P14Rik	RIKEN cDNA 3222402P14 gene	P	P	P	P	P	P	P	P	P	P	P	P	P
1416856_at	1719	1498	1176	1574	1725	1192	1223	1400	1629	1224	1769	3735	1758		3230401D17Rik	RIKEN cDNA 3230401D17 gene	P	P	P	P	P	P	P	P	P	P	P	P	P
1426767_at	294	966	364	183	144	566	366	438	295	388	146	134	163		3230401M21Rik	RIKEN cDNA 3230401M21 gene	P	P	P	P	P	P	P	P	P	P	P	A	P
1453326_at	62	25	526	588	330	119	176	540	298	60	58	44	391		3300001A09Rik /// LOC244911	RIKEN cDNA 3300001A09 gene /// similar to 3300001A09Rik protein	A	A	P	P	A	A	A	A	A	A	A	A	A
1428004_at	1053	885	1227	1194	887	550	1253	1241	1080	879	1046	1094	1357		3300001G02Rik	RIKEN cDNA 3300001G02 gene	P	P	P	P	P	P	P	P	P	P	P	P	P
1429355_at	13	69	220	106	106	55	175	258	190	13	6	8	154		3300001K11Rik	RIKEN cDNA 3300001K11 gene	A	P	P	A	A	A	P	P	P	A	A	A	P
1428754_at	3099	1558	1208	1097	1142	1558	1232	1396	1419	1804	1832	2050	1150		3300001M20Rik	RIKEN cDNA 3300001M20 gene	P	P	P	P	P	P	P	P	P	P	P	P	P
1424802_a_at	3693	8291	5153	6581	6612	7849	5138	5963	4834	6270	6608	5511	4152		3300001P08Rik	RIKEN cDNA 3300001P08 gene	P	P	P	P	P	P	P	P	P	P	P	P	P
1451485_at	955	1879	1606	1948	1814	2394	1577	1481	1534	2124	1968	1403	1474		3300001P08Rik	RIKEN cDNA 3300001P08 gene	P	P	P	P	P	P	P	P	P	P	P	P	P
1445154_at	164	202	147	117	119	63	71	101	48	255	145	112	107		3300002I08Rik	RIKEN cDNA 3300002I08 gene	P	P	P	P	P	P	P	P	A	P	P	P	P
1428540_at	710	1096	1231	809	850	2564	2667	2216	2064	1659	1009	895	1594		3321401G04Rik	RIKEN cDNA 3321401G04 gene	P	P	P	P	P	P	P	P	P	P	P	P	P
1428541_at	133	187	196	152	188	871	646	435	419	200	162	189	331		3321401G04Rik	RIKEN cDNA 3321401G04 gene	P	P	P	P	P	P	P	P	P	P	P	P	P
1437639_at	189	320	314	210	328	830	991	1080	796	265	191	196	677		3321401G04Rik	RIKEN cDNA 3321401G04 gene	P	P	P	P	P	P	P	P	P	P	P	P	P
1431717_at	73	163	191	125	103	1401	1364	1688	1056	275	147	53	1437		3526401B18Rik	RIKEN cDNA 3526401B18 gene	P	P	P	P	A	P	P	P	P	P	P	A	P
1436142_at	91	208	207	124	104	1831	1178	2491	1600	353	156	58	2797		3526401B18Rik	RIKEN cDNA 3526401B18 gene	P	P	P	P	P	P	P	P	P	P	P	A	P
1450770_at	314	171	109	65	32	690	495	625	407	5148	3182	634	867		3632451O06Rik	RIKEN cDNA 3632451O06 gene	P	P	P	P	A	P	P	P	P	P	P	P	P
1435106_at	6831	7708	7314	7122	7137	2261	2522	1344	1895	1366	2540	6726	2517		3732412D22Rik	RIKEN cDNA 3732412D22 gene	P	P	P	P	P	P	P	P	P	P	P	P	P
1435321_at	9425	12710	8312	11246	10802	3569	2656	1133	2391	1896	3891	9924	3186		3732412D22Rik	RIKEN cDNA 3732412D22 gene	P	P	P	P	P	P	P	P	P	P	P	P	P
1452769_at	4332	2800	4464	4068	4405	4326	5912	4648	4042	4984	4934	4692	4537		3732413I11Rik	RIKEN cDNA 3732413I11 gene	P	P	P	P	P	P	P	P	P	P	P	P	P
1434550_at	234	149	330	384	361	398	453	311	264	319	285	164	268		3830406C13Rik	RIKEN cDNA 3830406C13 gene	P	P	P	P	P	P	P	P	P	P	P	P	P
1436388_a_at	939	369	600	793	798	824	834	623	620	487	542	601	475		3830406C13Rik	RIKEN cDNA 3830406C13 gene	P	P	P	P	P	P	P	P	P	P	P	P	P
1429018_at	103	37	36	15	70	27	66	80	325	57	32	40	65		3830408D24Rik	RIKEN cDNA 3830408D24 gene	A	A	A	A	A	A	A	A	A	A	A	A	A
1453259_at	57	26	18	32	24	63	83	92	30	84	527	1961	198		3830422K02Rik	RIKEN cDNA 3830422K02 gene	A	A	A	A	A	A	A	A	A	A	P	P	A
1435672_at	356	3141	2127	1631	1752	722	437	735	510	8728	2855	236	1234		3830612M24	hypothetical protein 3830612M24	P	P	P	P	P	P	P	P	P	P	P	P	P
1453238_s_at	1083	564	418	394	631	1236	459	354	783	370	445	306	832		3930401B19Rik /// 1200016E24Rik /// A130040M12Rik /// E430024C06Rik	RIKEN cDNA 3930401B19 gene /// RIKEN cDNA 1200016E24 gene /// RIKEN cDNA A130040M12 gene /// RIKEN cDNA E430024C06 gene	P	P	P	P	P	P	P	P	P	P	P	P	P
1451994_s_at	1700	3459	3105	2011	2599	2368	4073	3375	2973	2801	2575	2054	2783		3930401K13Rik	RIKEN cDNA 3930401K13 gene	P	P	P	P	P	P	P	P	P	P	P	P	P
1428871_at	1242	2712	1746	2035	2008	5307	2596	2460	2391	2200	2823	3483	3659		4121402D02Rik	RIKEN cDNA 4121402D02 gene	P	P	P	P	P	P	P	P	P	P	P	P	P
1428872_at	286	654	717	684	714	1381	824	654	812	766	961	1032	1033		4121402D02Rik	RIKEN cDNA 4121402D02 gene	P	P	P	P	P	P	P	P	P	P	P	P	P
1434481_at	592	541	470	580	551	530	704	1304	685	760	564	587	524		4121402D02Rik	RIKEN cDNA 4121402D02 gene	P	P	P	P	P	P	P	P	P	P	P	P	P
1429530_a_at	96	179	134	39	85	588	241	113	139	208	139	81	36		4122402O22Rik	RIKEN cDNA 4122402O22 gene	P	P	P	A	P	P	P	P	P	P	P	A	A
1429531_at	123	230	126	154	150	224	163	223	149	208	93	111	151		4122402O22Rik	RIKEN cDNA 4122402O22 gene	P	P	P	P	A	P	P	P	P	P	A	A	A
1437024_at	134	275	146	116	92	492	264	134	144	203	190	91	60		4122402O22Rik	RIKEN cDNA 4122402O22 gene	P	P	P	P	P	P	P	P	P	P	P	P	P
1453182_a_at	408	278	651	396	405	395	549	532	360	596	383	354	156		4122402O22Rik	RIKEN cDNA 4122402O22 gene	P	P	P	P	P	P	P	P	P	P	P	P	A
1423224_at	923	309	563	404	274	333	539	622	488	191	195	227	368		4432405B04Rik	RIKEN cDNA 4432405B04 gene	P	P	P	P	P	P	P	P	P	P	P	P	P
1418040_at	240	127	199	246	253	163	226	130	144	236	113	162	157		4432406C05Rik	RIKEN cDNA 4432406C05 gene	P	P	P	P	P	P	P	P	P	P	P	P	P
1453976_at	66	651	255	225	140	207	178	19	102	293	355	214	63		4432414F05Rik	RIKEN cDNA 4432414F05 gene	A	P	P	P	P	P	A	P	A	P	P	P	A
1434147_at	125	186	132	207	212	1285	1940	2057	1395	282	230	254	1488		4631403P03Rik	RIKEN cDNA 4631403P03 gene	A	A	A	A	A	P	P	P	P	P	A	P	P
1429159_at	1604	2771	4275	10663	8984	77	1654	229	5412	151	143	627	2142		4631408O11Rik	RIKEN cDNA 4631408O11 gene	P	P	P	P	P	P	P	P	P	P	P	P	P
1429185_at	3923	8465	8569	9626	8374	823	896	400	302	1922	487	123	1014		4631416L12Rik	RIKEN cDNA 4631416L12 gene	P	P	P	P	P	P	P	P	P	P	P	P	P
1428727_at	351	389	293	213	224	127	98	35	137	382	232	115	104		4631422C13Rik	RIKEN cDNA 4631422C13 gene	P	P	P	P	P	P	A	P	P	P	P	P	P
1428861_at	178	105	90	100	19	39	97	86	405	43	52	47	214		4631422O05Rik /// LOC667770 /// LOC676704	RIKEN cDNA 4631422O05 gene /// similar to downregulated in ovarian cancer 1 isoform 2 /// similar to downregulated in ovarian cancer 1 isoform 2	P	P	P	P	A	A	P	P	P	A	A	A	P
1435633_at	127	370	223	226	258	377	363	343	505	789	632	457	437		4631424J17Rik	RIKEN cDNA 4631424J17 gene	P	P	P	P	P	P	P	P	P	P	P	P	P
1453028_at	103	496	262	160	214	845	350	247	275	312	358	241	389		4631424J17Rik	RIKEN cDNA 4631424J17 gene	P	P	P	P	P	P	P	P	P	P	P	P	P
1426514_at	94	113	74	6	9	375	238	206	226	266	108	13	238		4631426J05Rik	RIKEN cDNA 4631426J05 gene	A	A	A	A	A	P	P	P	P	P	A	A	P
1452092_at	520	339	331	103	17	2106	1214	1189	1316	1362	431	7	1085		4631426J05Rik	RIKEN cDNA 4631426J05 gene	P	P	P	A	A	P	P	P	P	P	P	A	P
1419730_at	93	501	211	257	271	332	112	230	122	306	202	125	97		4631427C17Rik	RIKEN cDNA 4631427C17 gene	A	P	P	A	P	P	A	A	A	A	A	A	A
1428195_at	182	129	108	126	223	107	81	219	116	71	66	79	207		4631427C17Rik	RIKEN cDNA 4631427C17 gene	P	A	A	A	P	P	P	P	P	A	A	A	P
1452703_at	4014	2963	2239	4571	5220	1712	1219	2751	2222	1655	1312	1582	3403		4631427C17Rik	RIKEN cDNA 4631427C17 gene	P	P	P	P	P	P	P	P	P	P	P	P	P
1431820_at	33	144	123	194	295	308	213	151	139	174	190	146	379		4632404H12Rik	RIKEN cDNA 4632404H12 gene	A	P	P	P	P	P	P	P	P	P	P	P	P
1452682_at	278	230	131	112	125	100	49	119	101	717	686	746	150		4632404H22Rik	RIKEN cDNA 4632404H22 gene	P	P	P	P	P	P	P	P	P	P	P	P	P
1428803_at	259	314	305	549	515	92	186	252	233	378	164	374	320		4632408A20Rik	RIKEN cDNA 4632408A20 gene	P	P	P	P	P	A	A	P	A	P	A	A	P
1438400_at	1322	937	1202	1629	1642	917	1188	1105	1300	1138	642	418	811		4632411B12Rik	RIKEN cDNA 4632411B12 gene	P	P	P	P	P	P	P	P	P	P	P	P	P
1429567_at	40	262	357	89	37	10	21	27	12	58	219	112	111		4632411J06Rik	RIKEN cDNA 4632411J06 gene	A	A	P	A	A	A	A	A	A	A	P	A	P
1453201_at	87	305	240	64	113	93	58	76	86	113	736	319	97		4632411J06Rik	RIKEN cDNA 4632411J06 gene	P	P	P	A	P	P	A	P	A	P	P	P	P
1457140_s_at	21	639	455	26	72	2	2	2	2	79	1674	553	54		4632411J06Rik	RIKEN cDNA 4632411J06 gene	A	P	P	A	A	A	A	A	A	A	P	P	P
1426974_at	1687	1306	2243	2712	1800	1203	1528	2057	1819	3711	3010	2081	990		4632413K17Rik	RIKEN cDNA 4632413K17 gene	P	P	P	P	P	P	P	P	P	P	P	P	P
1426975_at	143	134	330	328	204	186	204	207	249	437	481	310	189		4632413K17Rik	RIKEN cDNA 4632413K17 gene	P	P	P	P	A	P	P	P	P	P	P	P	P
1430614_at	458	214	566	749	523	487	465	362	326	444	480	348	372		4632415K11Rik	RIKEN cDNA 4632415K11 gene	P	P	P	P	P	P	P	P	P	P	P	P	P
1419612_at	123	99	207	330	293	94	184	97	117	251	201	151	187		4632415L05Rik	RIKEN cDNA 4632415L05 gene	P	P	P	P	P	P	P	P	P	P	P	P	P
1439886_at	594	789	541	1572	1655	789	803	1047	579	1134	755	465	1031		4632415L05Rik	RIKEN cDNA 4632415L05 gene	P	P	P	P	P	P	P	P	P	P	P	P	P
1422628_at	464	112	103	42	33	120	145	101	114	367	93	42	146		4632417K18Rik	RIKEN cDNA 4632417K18 gene	P	P	P	P	A	P	P	P	P	P	P	A	P
1427082_at	163	20	81	278	149	102	136	174	168	408	118	183	56		4632417N05Rik	RIKEN cDNA 4632417N05 gene	P	A	P	P	A	A	A	A	P	P	P	P	A
1433954_at	1908	1821	1633	1291	1066	495	355	210	324	2047	1437	1426	451		4632419I22Rik	RIKEN cDNA 4632419I22 gene	P	P	P	P	P	P	P	P	P	P	P	P	P
1426701_at	405	567	580	409	566	626	646	834	746	507	351	173	641		4632419K20Rik	RIKEN cDNA 4632419K20 gene	P	P	P	P	P	P	P	P	P	P	P	P	P
1418419_at	991	972	830	1041	1097	570	519	848	669	612	758	1100	806		4632423N09Rik	RIKEN cDNA 4632423N09 gene	P	P	P	P	P	A	P	P	P	P	P	P	P
1429331_at	45	385	68	53	129	59	16	43	58	439	355	142	21		4632427E13Rik	RIKEN cDNA 4632427E13 gene	A	P	P	A	P	P	A	A	A	P	P	P	A
1456201_at	188	1384	338	285	404	143	140	141	132	487	423	235	75		4632427E13Rik	RIKEN cDNA 4632427E13 gene	P	P	P	P	P	P	P	P	A	P	P	P	P
1416619_at	558	174	207	699	1373	34	112	101	683	985	330	214	603		4632428N05Rik	RIKEN cDNA 4632428N05 gene	P	P	P	P	P	P	P	P	P	P	P	P	P
1448407_at	584	183	240	390	787	7	73	113	201	540	136	112	237		4632428N05Rik	RIKEN cDNA 4632428N05 gene	P	A	P	P	P	A	A	A	P	P	A	A	P
1435261_at	473	348	275	338	295	1108	1037	1140	1396	273	848	1619	1431		4732416N19Rik	RIKEN cDNA 4732416N19 gene	P	P	P	P	P	P	P	P	P	P	P	P	P
1427978_at	617	464	609	1587	1573	61	113	183	330	566	1908	1935	402		4732418C07Rik	RIKEN cDNA 4732418C07 gene	P	P	P	P	P	A	A	A	P	P	P	P	P
1433875_at	2470	1881	2574	4502	5340	307	356	689	909	1657	6292	7277	1700		4732418C07Rik	RIKEN cDNA 4732418C07 gene	P	P	P	P	P	P	P	P	P	P	P	P	P
1452365_at	43	292	324	378	266	135	73	143	133	182	227	72	161		4732435N03Rik	RIKEN cDNA 4732435N03 gene	A	P	P	P	P	P	P	P	P	P	P	A	P
1452366_at	285	1846	2007	2257	1907	855	611	864	763	871	1606	215	780		4732435N03Rik	RIKEN cDNA 4732435N03 gene	P	P	P	P	P	P	P	P	P	P	P	P	P
1434591_at	229	335	381	544	463	285	249	168	193	797	333	310	141		4732460K03Rik	RIKEN cDNA 4732460K03 gene	P	P	P	P	P	P	P	P	P	P	P	P	P
1426876_at	118	82	91	240	269	9	11	12	11	14	26	10	9		4732466D17Rik	RIKEN cDNA 4732466D17 gene	P	A	P	P	P	A	A	A	A	A	A	A	A
1438980_x_at	167	90	163	304	454	9	5	8	7	27	4	4	34		4732466D17Rik	RIKEN cDNA 4732466D17 gene	P	A	P	P	P	A	A	A	A	A	A	A	P
1427326_at	125	123	89	143	175	159	220	176	164	165	53	87	132		4732471D19Rik	RIKEN cDNA 4732471D19 gene	A	A	A	A	A	A	A	P	P	P	A	A	A
1436234_at	158	234	161	107	216	213	289	312	260	269	161	102	249		4732471D19Rik	RIKEN cDNA 4732471D19 gene	P	P	P	P	P	P	P	P	P	P	P	P	P
1436235_x_at	204	330	135	163	184	363	347	371	304	242	157	81	303		4732471D19Rik	RIKEN cDNA 4732471D19 gene	P	P	P	P	P	P	P	P	P	P	P	P	P
1433672_at	525	521	639	931	1005	107	134	274	413	627	631	790	630		4732479N06Rik	RIKEN cDNA 4732479N06 gene	P	P	P	P	P	P	P	P	P	P	P	P	P
1427059_at	510	185	501	584	574	181	436	616	768	719	314	337	219		4732495E13Rik	RIKEN cDNA 4732495E13 gene	P	P	P	P	P	A	P	P	P	P	P	P	A
1457884_at	35	122	39	55	58	163	195	198	89	90	44	33	57		4732496C06Rik	RIKEN cDNA 4732496C06 gene	A	P	A	A	A	P	P	P	P	P	A	A	P
1434566_a_at	624	704	360	352	342	425	293	373	303	317	251	266	459		4732496O08Rik	RIKEN cDNA 4732496O08 gene	P	P	P	P	P	P	P	P	P	P	P	P	P
1434567_at	632	469	294	367	373	321	273	350	366	396	227	262	420		4732496O08Rik	RIKEN cDNA 4732496O08 gene	P	P	P	P	P	P	P	P	P	P	P	P	P
1418185_at	876	625	891	786	781	734	1469	1344	1169	884	931	939	1059		4733401H18Rik	RIKEN cDNA 4733401H18 gene	P	P	P	P	P	P	P	P	P	P	P	P	P
1456946_at	101	175	178	129	100	687	1117	572	463	338	112	64	495		4831416G18Rik	RIKEN cDNA 4831416G18 gene	A	A	P	A	A	P	P	P	P	P	A	A	P
1442369_at	141	232	166	147	228	340	273	320	259	251	221	341	323		4832406H04Rik	RIKEN cDNA 4832406H04 gene	A	P	P	P	P	P	P	P	P	P	P	P	P
1458584_at	141	234	114	307	398	570	288	383	239	412	230	214	274		4832406H04Rik	RIKEN cDNA 4832406H04 gene	P	P	P	P	P	P	P	P	P	P	P	P	P
1438062_at	181	532	265	398	616	201	180	238	253	351	328	268	211		4832420A03Rik	RIKEN cDNA 4832420A03 gene	P	P	P	P	P	P	P	P	P	P	P	P	P
1457751_at	107	308	122	52	471	330	69	216	275	560	534	407	32		4832420A03Rik	RIKEN cDNA 4832420A03 gene	A	P	A	A	P	P	P	P	P	P	P	P	A
1433537_at	2901	7484	4585	3854	3603	9800	7085	5361	5772	3402	3735	2524	5303		4833408C14Rik	RIKEN cDNA 4833408C14 gene	P	P	P	P	P	P	P	P	P	P	P	P	P
1429031_at	295	345	257	194	249	196	194	228	233	314	255	208	408		4833408D11Rik	RIKEN cDNA 4833408D11 gene	P	P	P	P	P	P	P	P	P	P	P	P	P
1437089_at	93	304	323	304	202	65	83	96	68	162	107	66	71		4833409A17Rik	RIKEN cDNA 4833409A17 gene	A	P	P	P	P	A	A	P	A	A	A	A	A
1429909_at	78	450	223	25	8	24	44	36	237	32	290	3635	180		4833411O04Rik	RIKEN cDNA 4833411O04 gene	A	P	P	A	A	A	A	A	P	A	P	P	P
1447914_x_at	51	335	95	21	13	4	5	1	138	21	167	2015	90		4833411O04Rik	RIKEN cDNA 4833411O04 gene	A	P	P	A	A	A	A	A	P	A	P	P	P
1430382_at	214	315	293	475	475	111	115	51	124	129	115	197	158		4833413G10Rik	RIKEN cDNA 4833413G10 gene	P	P	P	P	P	P	A	A	P	A	P	P	P
1440339_at	189	48	40	59	11	58	248	43	229	141	41	297	138		4833416E15Rik	RIKEN cDNA 4833416E15 gene	P	P	P	P	A	P	A	P	P	P	A	P	P
1430404_at	49	588	114	70	60	78	25	54	85	270	147	53	50		4833416J08Rik	RIKEN cDNA 4833416J08 gene	A	P	P	P	A	P	A	P	A	P	P	P	P
1453303_at	387	1331	892	547	708	2	49	14	153	284	464	632	78		4833417J20Rik	RIKEN cDNA 4833417J20 gene	P	P	P	P	P	A	A	A	A	P	P	P	A
1429847_a_at	155	265	201	206	220	213	167	115	141	253	341	404	184		4833418A01Rik	RIKEN cDNA 4833418A01 gene	P	P	P	P	P	P	P	P	P	P	P	P	P
1433831_at	165	182	238	217	183	279	332	188	183	307	515	588	233		4833418A01Rik	RIKEN cDNA 4833418A01 gene	P	P	P	P	P	P	P	P	P	P	P	P	P
1455254_at	995	1046	1567	1281	1088	1040	1184	984	801	1243	871	870	592		4833420G11Rik	RIKEN cDNA 4833420G11 gene	P	P	P	P	P	P	P	P	P	P	P	P	P
1455255_at	197	297	377	217	202	244	265	320	175	181	140	156	169		4833420G11Rik	RIKEN cDNA 4833420G11 gene	P	P	P	P	P	P	P	P	P	P	P	P	P
1419635_at	35	53	40	40	41	39	52	42	72	216	170	206	30		4833420G17Rik	RIKEN cDNA 4833420G17 gene	A	P	P	A	A	P	P	P	P	A	P	P	A
1419636_at	48	139	171	78	80	192	174	103	132	692	339	269	107		4833420G17Rik	RIKEN cDNA 4833420G17 gene	A	P	P	A	A	P	P	P	P	P	P	P	P
1419637_s_at	298	687	483	375	501	714	577	494	584	2163	1480	1239	539		4833420G17Rik	RIKEN cDNA 4833420G17 gene	P	P	P	P	P	P	P	P	P	P	P	P	P
1429119_at	1714	768	1187	647	529	612	730	825	867	942	1405	1387	828		4833421E05Rik	RIKEN cDNA 4833421E05 gene	P	P	P	P	P	P	P	P	P	P	P	P	P
1454898_s_at	833	615	710	232	263	495	507	699	412	437	744	604	628		4833421E05Rik	RIKEN cDNA 4833421E05 gene	P	P	P	P	P	P	P	P	P	P	P	P	P
1429249_at	55	254	296	153	116	261	438	456	327	1982	958	274	342		4833424O15Rik	RIKEN cDNA 4833424O15 gene	A	P	P	P	P	P	P	P	P	P	P	P	P
1434925_at	12	252	413	131	59	641	1334	1168	738	3003	1048	117	753		4833424O15Rik	RIKEN cDNA 4833424O15 gene	A	P	P	P	A	P	P	P	P	P	P	P	P
1438344_at	24	218	133	85	44	506	360	509	188	1025	495	101	450		4833424O15Rik	RIKEN cDNA 4833424O15 gene	A	P	P	P	A	P	P	P	P	P	P	P	P
1428996_at	220	515	467	601	613	254	171	144	130	207	197	183	175		4833426J09Rik	RIKEN cDNA 4833426J09 gene	P	P	P	P	P	A	P	P	A	P	P	P	P
1441285_at	123	174	166	202	225	166	71	76	46	86	121	125	94		4833426J09Rik	RIKEN cDNA 4833426J09 gene	P	P	P	P	P	P	P	P	A	A	A	A	P
1428713_s_at	597	592	460	110	44	78	109	30	21	182	110	53	30		4833427B12Rik	RIKEN cDNA 4833427B12 gene	P	A	P	A	A	A	A	A	A	A	A	A	A
1435717_at	1131	1272	1469	1730	1408	644	681	633	779	1965	1497	1047	636		4833428C12Rik	RIKEN cDNA 4833428C12 gene	P	P	P	P	P	P	P	P	P	P	P	P	P
1448100_at	12477	13766	13443	14525	12884	9161	6349	6623	6323	8161	12953	11720	9513		4833439L19Rik	RIKEN cDNA 4833439L19 gene	P	P	P	P	P	P	P	P	P	P	P	P	P
1456706_at	38	479	150	144	44	224	80	70	48	331	179	122	42		4833441D16Rik	RIKEN cDNA 4833441D16 gene	A	P	P	A	A	P	A	P	A	P	P	P	A
1427202_at	1456	200	264	565	437	128	136	162	172	135	59	44	173		4833442J19Rik	RIKEN cDNA 4833442J19 gene	P	P	P	P	P	P	P	P	P	P	A	A	P
1429417_at	8	44	26	7	7	299	132	400	197	43	84	61	244		4833446K15Rik	RIKEN cDNA 4833446K15 gene	A	P	A	A	A	P	P	P	P	A	P	A	P
1429810_at	27	839	179	182	159	273	55	93	109	271	616	216	76		4921505C17Rik	RIKEN cDNA 4921505C17 gene	A	P	P	P	P	P	A	A	A	P	P	P	P
1435698_at	534	638	304	372	347	782	296	426	525	637	2466	1626	879		4921505C17Rik	RIKEN cDNA 4921505C17 gene	P	P	P	P	P	P	P	P	P	P	P	P	P
1441753_at	37	370	80	64	63	171	59	42	130	180	522	258	25		4921505C17Rik	RIKEN cDNA 4921505C17 gene	A	P	A	A	A	P	A	A	P	P	P	P	A
1453775_at	63	178	117	160	169	106	67	64	136	160	1066	385	52		4921505C17Rik	RIKEN cDNA 4921505C17 gene	P	P	P	P	P	P	A	P	P	P	P	P	A
1430133_at	1745	1000	370	280	371	153	104	563	471	605	581	505	473		4921505D17Rik	RIKEN cDNA 4921505D17 gene	P	P	P	P	P	P	P	P	P	P	P	P	P
1452112_a_at	87	205	268	202	149	161	249	175	179	310	254	352	149		4921506I22Rik	RIKEN cDNA 4921506I22 gene	A	P	P	P	A	P	P	P	P	P	P	P	A
1428125_at	2856	3969	5061	5399	4383	8354	6168	6476	5522	5881	7685	9266	5502		4921506J03Rik	RIKEN cDNA 4921506J03 gene	P	P	P	P	P	P	P	P	P	P	P	P	P
1428126_a_at	1320	3830	3145	3425	2719	3809	3829	2547	3192	4259	6535	6975	4291		4921506J03Rik	RIKEN cDNA 4921506J03 gene	P	P	P	P	P	P	P	P	P	P	P	P	P
1428127_at	1757	3968	4079	3760	3082	4994	5774	4422	4858	5539	7140	7193	5041		4921506J03Rik	RIKEN cDNA 4921506J03 gene	P	P	P	P	P	P	P	P	P	P	P	P	P
1428128_at	5255	13967	8250	10122	8124	13554	11783	10251	8664	9760	15941	16488	13157		4921506J03Rik	RIKEN cDNA 4921506J03 gene	P	P	P	P	P	P	P	P	P	P	P	P	P
1429106_at	1835	968	744	1198	1146	787	456	1562	1116	450	472	647	2318		4921509J17Rik	RIKEN cDNA 4921509J17 gene	P	P	P	P	P	P	P	P	P	P	P	P	P
1424699_at	762	1600	2091	1270	989	1391	1194	1700	1297	122	96	116	977		4921511K06Rik	RIKEN cDNA 4921511K06 gene	P	P	P	P	P	P	P	P	P	A	A	A	P
1455063_at	124	238	236	324	333	80	125	48	81	382	387	415	128		4921513D11Rik /// AW061290	RIKEN cDNA 4921513D11 gene /// expressed sequence AW061290	P	P	P	P	P	P	A	P	P	P	P	P	P
1445862_at	102	257	186	313	244	142	117	119	146	382	244	217	87		4921513D23Rik	RIKEN cDNA 4921513D23 gene	P	P	P	P	P	P	P	P	P	P	P	P	P
1455381_at	232	60	178	226	197	404	226	267	304	317	264	294	300		4921513D23Rik	RIKEN cDNA 4921513D23 gene	P	A	P	P	P	P	P	P	P	P	P	P	P
1455377_at	457	231	220	292	436	2602	2682	6062	4805	1029	3360	14080	7873		4921517B04Rik	RIKEN cDNA 4921517B04 gene	P	P	P	P	P	P	P	P	P	P	P	P	P
1425047_a_at	104	92	83	191	211	63	51	113	102	173	115	84	76		4921517L17Rik	RIKEN cDNA 4921517L17 gene	P	P	P	P	P	A	A	A	A	P	P	A	P
1429121_at	212	181	156	124	202	151	124	135	161	155	286	484	232		4921517N04Rik	RIKEN cDNA 4921517N04 gene	P	P	P	P	P	P	P	P	P	P	P	P	P
1435274_at	321	847	366	248	247	479	362	385	337	564	435	153	547		4921517N04Rik	RIKEN cDNA 4921517N04 gene	P	P	P	P	P	P	P	P	P	P	P	P	P
1429573_at	156	119	124	75	17	202	164	461	247	170	250	379	222		4921520P21Rik	RIKEN cDNA 4921520P21 gene	P	A	A	A	A	A	P	P	P	P	P	P	P
1439496_at	1443	363	283	276	342	113	146	56	165	85	47	38	168		4921524J06Rik	RIKEN cDNA 4921524J06 gene	P	P	P	P	P	P	P	P	P	P	A	A	P
1454136_a_at	940	738	514	599	590	2111	1695	1439	1780	1137	1063	811	1542		4921524J17Rik	RIKEN cDNA 4921524J17 gene	P	P	P	P	P	P	P	P	P	P	P	P	P
1436086_at	40	137	151	129	117	19	66	17	42	240	123	15	45		4921526F01Rik	RIKEN cDNA 4921526F01 gene	A	P	P	P	A	A	A	P	A	P	A	A	A
1428762_at	774	1006	608	565	540	2804	1824	934	1075	1128	707	512	968		4921526G09Rik	RIKEN cDNA 4921526G09 gene	P	P	P	P	P	P	P	P	P	P	P	P	P
1416668_at	8997	6403	6965	10192	10321	5884	4246	5074	5632	5688	7311	8196	8482		4921531G14Rik	RIKEN cDNA 4921531G14 gene	P	P	P	P	P	P	P	P	P	P	P	P	P
1453122_at	2022	2459	2358	2827	2940	1382	1193	802	1199	2699	2571	1729	1049		4921533L14Rik	RIKEN cDNA 4921533L14 gene	P	P	P	P	P	P	P	P	P	P	P	P	P
1430303_at	172	277	165	171	181	486	287	360	339	284	246	438	467		4921537D05Rik	RIKEN cDNA 4921537D05 gene	P	P	P	P	P	P	P	P	P	P	P	P	P
1453045_at	389	1136	978	801	861	495	441	755	537	384	151	181	746		4921537D05Rik	RIKEN cDNA 4921537D05 gene	P	P	P	P	P	P	P	P	P	P	P	P	P
1431581_at	17	196	52	55	40	241	237	205	157	159	64	21	88		4922502B01Rik	RIKEN cDNA 4922502B01 gene	A	A	A	A	A	P	A	P	A	P	A	A	A
1434480_at	463	603	482	815	689	467	237	222	249	365	320	272	313		4930402E16Rik	RIKEN cDNA 4930402E16 gene	P	P	P	P	P	P	P	P	P	P	P	P	P
1454980_at	1442	1415	1439	1977	1784	652	729	651	700	1413	1078	1128	813		4930402E16Rik	RIKEN cDNA 4930402E16 gene	P	P	P	P	P	P	P	P	P	P	P	P	P
1459869_x_at	1490	1112	1219	1638	1455	1321	777	718	760	1101	1165	1066	1179		4930402E16Rik	RIKEN cDNA 4930402E16 gene	P	P	P	P	P	P	P	P	P	P	P	P	P
1429694_at	102	504	381	391	293	194	159	148	99	146	331	244	90		4930402H24Rik	RIKEN cDNA 4930402H24 gene	P	P	P	P	P	P	P	P	P	P	P	P	P
1430285_at	36	289	371	243	175	388	319	134	111	127	535	282	22		4930402H24Rik	RIKEN cDNA 4930402H24 gene	A	A	P	P	A	P	A	P	A	A	P	P	A
1434126_at	678	1648	1928	2238	2468	530	717	506	480	447	3698	4933	768		4930402H24Rik	RIKEN cDNA 4930402H24 gene	P	P	P	P	P	P	P	P	P	P	P	P	P
1453465_x_at	88	324	459	305	206	384	324	199	178	198	647	392	118		4930402H24Rik	RIKEN cDNA 4930402H24 gene	A	P	P	P	P	P	A	P	P	P	P	P	P
1438038_at	571	1069	2011	3115	3343	753	545	504	461	672	4596	5640	673		4930402H24Rik	RIKEN cDNA 4930402H24 gene	P	P	P	P	P	P	P	P	P	P	P	P	P
1439812_at	59	158	125	76	82	118	130	77	73	58	199	162	64		4930402H24Rik	RIKEN cDNA 4930402H24 gene	P	P	P	P	A	P	A	P	A	P	P	P	A
1428833_at	73	84	49	61	49	79	71	114	128	106	472	1245	86		4930406D14Rik	RIKEN cDNA 4930406D14 gene	A	P	A	A	A	P	P	A	A	P	P	P	A
1443790_x_at	110	424	384	230	258	1229	833	764	526	291	208	134	754		4930414L22Rik	RIKEN cDNA 4930414L22 gene	P	P	P	P	P	P	P	P	P	P	P	A	P
1439541_at	100	342	416	277	232	1018	793	698	631	453	242	132	366		4930414L22Rik	RIKEN cDNA 4930414L22 gene	P	P	P	P	P	P	P	P	P	P	P	P	P
1447114_x_at	64	119	82	24	46	242	227	260	144	87	91	35	106		4930414L22Rik	RIKEN cDNA 4930414L22 gene	A	A	A	A	A	P	P	P	P	A	A	A	A
1456779_a_at	78	324	294	155	226	881	598	610	407	262	114	63	452		4930414L22Rik	RIKEN cDNA 4930414L22 gene	P	P	P	P	P	P	P	P	P	P	P	A	P
1456518_at	163	527	415	533	625	264	326	374	375	473	155	152	127		4930422I07Rik	RIKEN cDNA 4930422I07 gene	P	P	P	P	P	P	P	P	P	P	P	P	P
1458491_at	288	1288	602	676	529	891	648	512	591	635	189	153	442		4930422I07Rik	RIKEN cDNA 4930422I07 gene	P	P	P	P	P	P	P	P	P	P	P	P	P
1455818_at	317	374	266	85	42	165	146	73	76	445	130	147	41		4930427A07Rik	RIKEN cDNA 4930427A07 gene	P	P	P	A	A	P	A	P	A	P	P	A	A
1430516_at	130	211	123	109	121	276	265	247	218	204	87	118	453		4930428B01Rik	RIKEN cDNA 4930428B01 gene	P	P	P	P	P	P	P	P	P	P	P	P	P
1434090_at	31	99	104	83	17	174	173	97	151	171	156	263	50		4930429A22Rik	RIKEN cDNA 4930429A22 gene	A	A	P	A	A	P	P	P	P	P	A	P	A
1420580_at	115	108	89	106	119	193	192	507	315	150	92	76	417		4930429B21Rik	RIKEN cDNA 4930429B21 gene	P	P	P	P	P	P	P	P	P	P	P	A	P
1429728_at	433	386	315	314	622	206	237	357	183	397	345	383	545		4930429M06Rik	RIKEN cDNA 4930429M06Rik	P	P	P	P	P	P	P	P	P	P	P	P	P
1451653_a_at	124	122	131	136	179	82	102	103	130	123	117	242	90		4930430E16Rik	RIKEN cDNA 4930430E16 gene	P	P	P	P	P	A	A	P	P	P	P	P	A
1433978_at	375	794	516	766	989	296	236	465	326	525	574	766	522		4930430F08Rik	RIKEN cDNA 4930430F08 gene	P	P	P	P	P	P	P	P	P	P	P	P	P
1428799_at	365	567	458	324	385	621	318	264	174	193	159	213	235		4930431B11Rik	RIKEN cDNA 4930431B11 gene	P	P	P	P	P	P	P	P	P	P	P	P	P
1439484_at	291	731	526	439	336	1163	618	348	279	707	803	505	470		4930431H11Rik	RIKEN cDNA 4930431H11 gene	P	P	P	P	P	P	P	P	P	P	P	P	P
1434625_at	463	702	474	460	713	643	484	848	549	589	565	622	1138		4930432O21Rik	RIKEN cDNA 4930432O21 gene	P	P	P	P	P	P	P	P	P	P	P	P	P
1424003_at	520	313	574	393	365	1224	1258	863	731	834	740	391	917		4930444A02Rik	RIKEN cDNA 4930444A02 gene	P	P	P	P	P	P	P	P	P	P	P	P	P
1424004_x_at	603	346	720	536	548	1573	1333	1118	1046	1155	1114	510	1128		4930444A02Rik	RIKEN cDNA 4930444A02 gene	P	P	P	P	P	P	P	P	P	P	P	P	P
1453475_at	301	544	340	310	387	248	199	346	259	339	309	223	220		4930445K14Rik	RIKEN cDNA 4930445K14 gene	P	P	P	P	A	A	P	P	P	P	P	P	P
1438228_at	183	57	84	63	66	240	310	218	144	89	23	10	156		4930452B06Rik	RIKEN cDNA 4930452B06 gene	P	A	A	A	A	P	P	P	P	A	A	A	P
1430755_at	8	36	21	17	19	47	44	9	24	82	1713	1696	130		4930452G13Rik	RIKEN cDNA 4930452G13 gene	A	A	A	A	A	A	A	A	A	A	P	P	P
1423976_at	1182	756	837	966	1121	445	597	623	477	666	670	818	739		4930453N24Rik	RIKEN cDNA 4930453N24 gene	P	P	P	P	P	P	P	P	P	P	P	P	P
1438553_x_at	323	473	218	167	190	168	141	263	197	345	377	526	272		4930453N24Rik	RIKEN cDNA 4930453N24 gene	P	P	P	P	P	P	P	P	P	P	P	P	P
1449718_s_at	543	265	231	307	360	94	58	136	147	201	217	247	301		4930453N24Rik	RIKEN cDNA 4930453N24 gene	P	P	P	P	P	P	P	P	P	P	P	P	P
1420329_at	376	281	407	183	374	361	349	531	303	331	293	303	282		4930455C21Rik	RIKEN cDNA 4930455C21 gene	P	P	P	P	P	P	P	P	P	P	P	P	P
1435052_at	312	162	272	298	214	199	427	265	275	373	217	308	194		4930455F23Rik	RIKEN cDNA 4930455F23 gene	P	P	P	P	P	P	P	P	P	P	P	P	P
1460711_at	337	328	213	211	222	206	238	312	376	293	342	503	490		4930461P20Rik	RIKEN cDNA 4930461P20 gene	P	A	P	P	A	P	P	P	P	P	P	P	P
1439671_at	234	335	237	281	267	141	190	99	172	370	232	143	182		4930466K18Rik	RIKEN cDNA 4930466K18 gene	P	P	P	P	P	P	P	P	P	P	P	P	P
1418996_a_at	3816	2055	1515	2444	2901	544	487	1249	996	1140	1753	2323	1402		4930469P12Rik	RIKEN cDNA 4930469P12 gene	P	P	P	P	P	P	P	P	P	P	P	P	P
1418997_at	148	318	194	211	318	73	78	235	90	66	134	182	107		4930469P12Rik	RIKEN cDNA 4930469P12 gene	P	P	P	P	P	P	P	P	P	P	P	P	P
1459793_s_at	928	1803	1777	2670	2420	242	675	716	603	1081	1073	1571	616		4930469P12Rik	RIKEN cDNA 4930469P12 gene	P	P	P	P	P	P	P	P	P	P	P	P	P
1426220_at	516	267	685	750	822	100	167	408	251	321	319	474	242		4930471M23Rik	RIKEN cDNA 4930471M23 gene	P	P	P	P	P	P	P	P	P	P	P	P	P
1434048_at	320	278	572	607	842	89	186	204	267	375	423	562	150		4930471M23Rik	RIKEN cDNA 4930471M23 gene	P	P	P	P	P	A	A	P	P	P	P	P	A
1428525_at	134	334	513	966	1820	6287	4616	7468	5499	3035	603	520	6262		4930488B01Rik	RIKEN cDNA 4930488B01 gene	P	P	P	P	P	P	P	P	P	P	P	P	P
1455213_at	435	247	348	182	173	499	709	609	403	360	358	288	335		4930488E11Rik	RIKEN cDNA 4930488E11 gene	P	P	P	P	P	P	P	P	P	P	P	P	P
1439969_at	505	791	1099	905	544	1822	1091	1273	1411	1290	1215	475	1372		4930500O05Rik	RIKEN cDNA 4930500O05 gene	P	P	P	P	P	P	P	P	P	P	P	P	P
1454701_at	299	1325	398	193	365	344	154	185	262	499	351	301	190		4930503L19Rik	RIKEN cDNA 4930503L19 gene	P	P	P	P	P	P	P	P	P	P	P	P	P
1426655_a_at	384	450	407	528	405	254	375	179	753	964	1548	1655	212		4930504E06Rik	RIKEN cDNA 4930504E06 gene	P	P	P	P	P	P	P	P	P	P	P	P	P
1426656_at	731	682	548	1107	778	377	635	407	1099	1406	2221	2364	357		4930504E06Rik	RIKEN cDNA 4930504E06 gene	P	P	P	P	P	P	P	P	P	P	P	P	P
1437046_x_at	1592	1886	1231	2050	1689	794	1235	796	2088	2875	4962	5368	1020		4930504E06Rik	RIKEN cDNA 4930504E06 gene	P	P	P	P	P	A	A	P	P	P	P	P	P
1438321_x_at	1497	1590	1344	1725	1501	667	1304	826	2317	2816	5873	6583	848		4930504E06Rik	RIKEN cDNA 4930504E06 gene	P	P	P	P	P	P	P	P	P	P	P	P	P
1439634_at	6	47	5	21	7	510	252	365	336	50	25	19	170		4930505D03Rik	RIKEN cDNA 4930505D03 gene	A	A	A	A	A	P	P	P	P	A	A	A	P
1424012_at	558	229	298	184	210	139	162	242	197	118	82	115	261		4930506L13Rik	RIKEN cDNA 4930506L13 gene	P	P	P	P	P	P	P	P	P	P	P	P	P
1429055_at	248	62	72	10	19	3683	4841	1943	979	150	224	1485	868		4930506M07Rik	RIKEN cDNA 4930506M07 gene	P	P	P	A	A	P	P	P	P	P	P	P	P
1417478_a_at	1102	1092	949	897	1209	1361	1297	1121	1025	1039	1302	1595	1549		4930511A21Rik	RIKEN cDNA 4930511A21 gene	P	P	P	P	P	P	P	P	P	P	P	P	P
1429133_at	17	25	26	50	50	289	302	56	41	6	31	38	53		4930519N16Rik	RIKEN cDNA 4930519N16 gene	A	A	A	A	A	P	A	P	A	A	A	A	A
1424535_at	354	721	663	623	622	543	687	774	601	423	290	214	413		4930521E07Rik	RIKEN cDNA 4930521E07 gene	P	P	P	P	P	P	P	P	P	P	P	P	P
1456446_at	28	419	271	137	99	4	17	2	27	2	3	5	1		4930523C07Rik	RIKEN cDNA 4930523C07 gene	A	P	P	A	A	A	A	A	A	A	A	A	A
1431228_s_at	590	917	963	681	309	1153	991	499	616	884	759	653	544		4930526I15Rik	RIKEN cDNA 4930526I15 gene	P	P	P	P	P	P	P	P	P	P	P	P	P
1436029_at	1060	210	185	200	245	138	433	193	310	213	322	646	261		4930533K18Rik /// Bicc1	RIKEN cDNA 4930533K18 gene /// bicaudal C homolog 1 (Drosophila)	P	P	P	P	P	P	A	P	P	P	P	P	P
1429228_at	73	35	67	289	550	26	33	8	20	39	6	15	15		4930534B04Rik	RIKEN cDNA 4930534B04 gene	P	A	P	P	P	P	A	A	A	A	A	A	A
1429229_s_at	197	117	176	1033	1950	115	57	31	31	113	71	70	111		4930534B04Rik	RIKEN cDNA 4930534B04 gene	P	A	P	P	P	P	A	A	A	A	A	A	P
1441867_x_at	529	465	696	3729	6078	226	195	161	149	334	192	224	535		4930534B04Rik	RIKEN cDNA 4930534B04 gene	P	P	P	P	P	P	A	P	P	P	P	P	P
1438028_at	252	387	186	251	273	436	253	304	376	239	197	228	357		4930535B03Rik	RIKEN cDNA 4930535B03 gene	P	P	P	P	P	P	P	P	P	P	P	P	P
1438029_at	337	306	229	274	393	579	286	500	370	380	313	259	576		4930535B03Rik	RIKEN cDNA 4930535B03 gene	P	P	P	P	P	P	P	P	P	P	P	P	P
1438561_x_at	637	460	1085	1200	984	466	550	900	735	1247	903	1351	430		4930538D17Rik	RIKEN cDNA 4930538D17 gene	P	P	P	P	P	P	P	P	P	P	P	P	P
1437918_at	9	14	19	77	29	762	354	484	473	91	42	29	450		4930539E08Rik	RIKEN cDNA 4930539E08 gene	A	A	A	A	A	P	P	P	P	A	A	A	P
1430154_at	153	347	174	231	184	683	693	1260	1033	351	290	112	1237		4930543C13Rik	RIKEN cDNA 4930543C13 gene	P	P	P	P	P	P	P	P	P	P	P	P	P
1454926_at	189	142	86	62	53	5481	4742	6238	4687	299	125	59	4707		4930544G21Rik	RIKEN cDNA 4930544G21 gene	P	P	P	A	A	P	P	P	P	P	P	A	P
1418387_at	893	1001	585	798	697	930	902	1289	1110	666	633	604	1258		4930548G07Rik	RIKEN cDNA 4930548G07 gene	P	P	P	P	P	P	P	P	P	P	P	P	P
1418388_s_at	2263	1915	1281	1769	1611	3034	2586	2901	2881	1916	1531	1683	2766		4930548G07Rik	RIKEN cDNA 4930548G07 gene	P	P	P	P	P	P	P	P	P	P	P	P	P
1455055_at	1067	1603	1432	1163	1152	388	363	499	373	273	162	212	419		4930562D19Rik	RIKEN cDNA 4930562D19 gene	P	P	P	P	P	P	P	P	P	P	A	A	P
1430763_at	230	427	272	196	340	409	297	436	260	361	306	265	388		4930563E22Rik	RIKEN cDNA 4930563E22 gene	P	P	P	P	P	P	P	P	P	P	P	P	P
1447028_at	170	460	277	285	289	420	362	373	288	311	243	221	462		4930563E22Rik	RIKEN cDNA 4930563E22 gene	A	P	P	P	P	P	P	P	P	P	P	P	P
1429066_at	209	507	278	280	243	190	227	157	138	286	203	136	102		4930565B19Rik	RIKEN cDNA 4930565B19 gene	P	P	P	P	P	P	P	P	P	P	P	A	P
1426889_at	196	464	401	289	137	1214	1093	499	575	786	376	305	433		4930566A11Rik	RIKEN cDNA 4930566A11 gene	P	P	P	P	A	P	P	P	P	P	P	P	P
1450409_a_at	2739	509	2411	4919	5150	782	1629	1954	1842	1348	2802	12199	1633		4930570C03Rik	RIKEN cDNA 4930570C03 gene	P	P	P	P	P	P	P	P	P	P	P	P	P
1450410_a_at	1151	859	1120	2151	1997	117	290	217	314	638	1179	3880	321		4930570C03Rik	RIKEN cDNA 4930570C03 gene	P	P	P	P	P	P	P	P	P	P	P	P	P
1439502_at	585	614	553	752	820	443	661	1059	714	513	880	1302	715		4930573I19Rik	RIKEN cDNA 4930573I19 gene	P	P	P	P	P	P	P	P	P	P	P	P	P
1431204_at	198	126	148	235	126	83	86	109	67	117	79	83	131		4930578N16Rik	RIKEN cDNA 4930578N16 gene	P	P	P	P	P	P	P	P	P	P	P	A	P
1430316_at	355	321	311	308	338	450	369	497	470	696	484	421	478		4930579E17Rik	RIKEN cDNA 4930579E17 gene	P	P	P	P	P	P	P	P	P	P	P	P	P
1429364_at	542	389	390	142	187	327	201	103	154	660	221	319	116		4930579G24Rik	RIKEN cDNA 4930579G24 gene	P	P	P	P	P	P	P	P	P	P	P	P	P
1430066_at	633	1544	1252	2834	3955	604	472	601	475	1632	1238	833	718		4930589M24Rik	RIKEN cDNA 4930589M24 gene	P	P	P	P	P	P	P	P	P	P	P	P	P
1453510_s_at	139	430	392	779	948	153	125	96	103	411	379	219	137		4930589M24Rik	RIKEN cDNA 4930589M24 gene	P	P	P	P	P	P	P	P	P	P	P	P	P
1416607_at	2921	3285	2852	4805	6107	884	836	448	474	1292	1911	2032	1273		4931406C07Rik	RIKEN cDNA 4931406C07 gene	P	P	P	P	P	P	P	P	P	P	P	P	P
1454067_a_at	606	460	518	928	1437	174	167	79	134	275	369	387	174		4931406C07Rik	RIKEN cDNA 4931406C07 gene	P	P	P	P	P	P	P	P	P	P	P	P	P
1415717_at	430	615	683	689	599	1333	1326	1459	1209	900	876	1707	847		4931406I20Rik	RIKEN cDNA 4931406I20 gene	P	P	P	P	P	P	P	P	P	P	P	P	P
1440297_at	42	74	40	51	48	66	38	44	53	46	308	543	96		4931406I20Rik	RIKEN cDNA 4931406I20 gene	A	P	A	A	A	P	A	A	P	A	P	P	A
1433993_at	1178	2002	1300	1277	1106	590	889	676	2596	2018	2574	4968	1003		4931406P16Rik	RIKEN cDNA 4931406P16 gene	P	P	P	P	P	P	P	P	P	P	P	P	P
1433994_at	155	242	191	132	190	57	135	102	434	271	359	673	135		4931406P16Rik	RIKEN cDNA 4931406P16 gene	P	P	P	P	P	A	A	P	P	P	P	P	P
1460619_at	649	166	341	391	399	366	343	214	176	250	203	268	169		4931419K03Rik	RIKEN cDNA 4931419K03 gene	P	P	P	P	P	P	P	P	P	P	P	P	P
1418749_at	1320	1311	1950	2520	2521	6124	4028	6262	4962	1789	1976	4000	8231		4931420C21Rik	RIKEN cDNA 4931420C21 gene	P	P	P	P	P	P	P	P	P	P	P	P	P
1429756_at	8	9	22	20	21	148	247	168	141	110	120	97	116		4931428F04Rik	RIKEN cDNA 4931428F04 gene	A	A	A	A	A	A	A	P	A	A	A	A	A
1435024_at	35	169	52	39	68	1013	784	353	203	231	235	123	242		4931428F04Rik	RIKEN cDNA 4931428F04 gene	A	P	A	A	A	P	P	P	P	P	P	P	P
1443344_at	27	123	55	74	85	475	254	265	271	167	105	97	191		4932409I22Rik	RIKEN cDNA 4932409I22 gene	A	A	A	P	P	P	P	P	P	P	A	P	P
1454730_at	1828	2448	2528	2399	2875	2116	1348	1324	1448	1648	3047	3939	1694		4932414K18Rik	RIKEN cDNA 4932414K18 gene	P	P	P	P	P	P	P	P	P	P	P	P	P
1455775_at	260	135	195	178	275	206	206	366	246	165	218	275	388		4932415D10Rik	RIKEN cDNA 4932415D10 gene	P	P	P	P	P	P	P	P	P	P	P	P	P
1428375_at	234	105	227	233	172	168	254	321	311	385	293	362	312		4932415G12Rik	RIKEN cDNA 4932415G12 gene	P	P	P	P	P	P	P	P	P	P	P	P	P
1455326_at	391	345	336	440	420	543	456	617	500	479	246	128	621		4932416N17Rik	RIKEN cDNA 4932416N17 gene	A	A	A	P	A	P	P	P	P	P	A	A	P
1456602_at	252	250	175	183	138	261	254	337	253	275	168	167	175		4932417I16Rik	RIKEN cDNA 4932417I16 gene	P	P	P	P	A	P	P	P	P	P	P	A	P
1424738_at	370	406	302	419	566	375	224	354	416	451	483	688	440		4932432K03Rik	RIKEN cDNA 4932432K03 gene	P	P	P	P	P	P	P	P	P	P	P	P	P
1438418_at	528	599	504	857	735	417	338	404	437	703	703	807	547		4932432K03Rik	RIKEN cDNA 4932432K03 gene	P	P	P	P	P	P	P	P	P	P	P	P	P
1428625_a_at	830	1129	1112	1096	1159	979	505	368	359	514	497	806	713		4932432N11Rik	RIKEN cDNA 4932432N11 gene	P	P	P	P	P	P	P	P	P	P	P	P	P
1430805_s_at	1681	1364	1316	1081	2176	1754	760	802	776	1347	955	1082	1528		4932432N11Rik	RIKEN cDNA 4932432N11 gene	P	P	P	P	P	P	P	P	P	P	P	P	P
1429689_at	80	205	172	88	156	274	286	184	186	178	189	161	204		4932433N03Rik	RIKEN cDNA 4932433N03 gene	P	P	P	P	P	P	P	P	P	P	P	P	P
1427016_at	606	1216	1052	949	994	2426	1920	2947	2163	954	789	765	2059		4932438A13Rik /// LOC665732	RIKEN cDNA 4932438A13 gene /// similar to CG4841-PA	P	P	P	P	P	P	P	P	P	P	P	P	P
1428300_at	1198	1161	1194	1403	1027	1088	965	624	1032	1107	692	790	714		4932439K10Rik	RIKEN cDNA 4932439K10 gene	P	P	P	P	P	P	P	P	P	P	P	P	P
1434681_at	490	407	264	341	422	241	263	244	340	461	344	416	265		4932441K18Rik	RIKEN cDNA 4932441K18 gene	P	P	P	P	P	P	P	P	P	P	P	P	P
1439131_at	348	170	190	180	303	625	393	549	407	198	235	221	720		4932441K18Rik	RIKEN cDNA 4932441K18 gene	P	P	P	P	P	P	P	P	P	P	P	P	P
1417142_at	638	274	513	649	682	618	810	694	684	1016	779	805	568		4932442K08Rik	RIKEN cDNA 4932442K08 gene	P	P	P	P	P	P	P	P	P	P	P	P	P
1435668_at	481	309	377	458	343	1006	1053	1301	931	535	355	242	1186		4932442K08Rik	RIKEN cDNA 4932442K08 gene	P	P	P	P	P	P	P	P	P	P	P	P	P
1438427_at	157	158	257	193	192	186	366	194	182	474	217	146	46		4932442K08Rik	RIKEN cDNA 4932442K08 gene	P	P	P	P	P	P	P	P	P	P	P	P	A
1454079_at	19	207	108	15	15	218	537	463	320	512	141	65	339		4933400F03Rik	RIKEN cDNA 4933400F03 gene	A	P	P	A	A	P	P	P	P	P	P	A	P
1433906_at	81	133	60	46	53	3213	2460	2551	1507	182	834	553	2845		4933402J24Rik	RIKEN cDNA 4933402J24 gene	P	P	A	P	A	P	P	P	P	P	P	P	P
1459941_at	15	10	23	19	21	427	212	133	85	41	11	11	61		4933402J24Rik	RIKEN cDNA 4933402J24 gene	A	A	A	A	A	P	P	P	P	A	A	A	A
1434977_at	330	278	343	313	475	182	152	194	172	263	188	245	316		4933403F05Rik	RIKEN cDNA 4933403F05 gene	P	P	P	P	P	P	P	P	P	P	P	P	P
1434978_at	534	364	312	415	513	368	283	480	314	298	211	260	613		4933403F05Rik	RIKEN cDNA 4933403F05 gene	P	P	P	P	P	P	P	P	P	P	P	P	P
1434979_at	330	166	166	217	335	149	120	274	187	209	154	136	259		4933403F05Rik	RIKEN cDNA 4933403F05 gene	P	P	P	P	P	P	P	P	P	P	P	P	P
1442508_at	21	214	482	658	595	12	42	7	46	48	9	9	126		4933404M19Rik /// RP23-185A18.6 /// LOC216974	RIKEN cDNA 4933404M19 gene /// similar to hypothetical protein MGC39650 /// similar to proline-rich cyclin A1-interacting protein	A	A	P	P	P	A	A	A	A	A	A	A	A
1435827_at	152	188	226	137	131	369	390	550	322	560	267	160	452		4933404O12Rik	RIKEN cDNA 4933404O12 gene	P	P	P	P	P	P	P	P	P	P	P	P	P
1428211_at	453	547	859	811	745	869	1508	2536	2004	1222	1850	2583	1330		4933406E20Rik	RIKEN cDNA 4933406E20 gene	P	P	P	P	P	P	P	P	P	P	P	P	P
1459807_x_at	580	769	712	649	800	1633	1056	4838	1346	761	1232	1284	2037		4933406E20Rik	RIKEN cDNA 4933406E20 gene	P	P	P	P	P	P	P	P	P	P	P	P	P
1427980_at	702	514	948	1243	715	2055	6240	4800	4660	2052	4650	4734	2449		4933407C03Rik	RIKEN cDNA 4933407C03 gene	P	P	P	P	P	P	P	P	P	P	P	P	P
1460032_at	84	571	139	192	278	294	86	129	98	283	589	269	140		4933407C03Rik	RIKEN cDNA 4933407C03 gene	A	P	P	P	P	P	P	P	P	P	P	P	P
1439495_at	135	271	229	174	215	95	177	120	124	219	259	225	88		4933407H18Rik	RIKEN cDNA 4933407H18 gene	P	P	P	P	P	P	P	P	P	P	P	P	P
1424693_at	501	388	505	553	575	331	225	325	371	355	324	370	361		4933407N01Rik	RIKEN cDNA 4933407N01 gene	P	P	P	P	P	P	P	P	P	P	P	P	P
1440851_at	168	972	553	383	377	211	288	298	302	525	479	276	393		4933407N01Rik	RIKEN cDNA 4933407N01 gene	P	P	P	P	P	P	P	P	P	P	P	P	P
1451449_at	5037	3428	4286	4661	4503	1695	2073	2843	2688	3595	2908	4537	2654		4933407N01Rik	RIKEN cDNA 4933407N01 gene	P	P	P	P	P	P	P	P	P	P	P	P	P
1447937_a_at	46	141	97	102	34	140	285	310	223	62	32	11	245		4933409K07Rik /// LOC545605 /// LOC545614 /// LOC622738 /// LOC665744 /// LOC665845	RIKEN cDNA 4933409K07 gene /// similar to 4933409K07Rik protein /// similar to 4933409K07Rik protein /// hypothetical protein LOC622738 /// similar to similar to 4933409K07Rik protein /// hypothetical protein LOC665845	A	P	P	P	A	P	P	P	P	A	A	A	P
1447939_a_at	311	700	321	481	410	915	1146	1357	1102	459	60	61	1373		4933409K07Rik /// LOC545605 /// LOC665845	RIKEN cDNA 4933409K07 gene /// similar to 4933409K07Rik protein /// hypothetical protein LOC665845	P	P	P	P	P	P	P	P	P	A	A	A	P
1429155_at	1117	422	410	656	710	648	601	788	900	875	561	469	1544		4933411K20Rik	RIKEN cDNA 4933411K20 gene	P	P	P	P	P	P	P	P	P	P	P	P	P
1447711_x_at	603	146	114	84	91	199	186	194	163	122	29	61	195		4933412E12Rik	RIKEN cDNA 4933412E12 gene	P	P	A	A	A	P	P	P	P	A	A	A	P
1435796_at	284	146	105	72	119	867	795	891	662	182	58	16	656		4933413A10Rik	RIKEN cDNA 4933413A10 gene	P	A	P	A	A	P	P	P	P	P	A	A	P
1439497_at	89	136	88	186	112	266	216	176	173	66	162	67	237		4933415E08Rik	RIKEN cDNA 4933415E08 gene	P	P	P	P	P	P	P	P	P	A	P	A	P
1459920_at	78	113	48	126	130	209	201	235	169	54	88	34	270		4933415E08Rik	RIKEN cDNA 4933415E08 gene	P	A	A	P	A	P	P	P	P	A	P	A	P
1458438_at	626	199	326	541	487	8	9	67	44	25	81	132	92		4933415L06Rik	RIKEN cDNA 4933415L06 gene	P	P	P	P	P	A	A	A	A	A	A	P	P
1432922_at	18	144	207	281	311	3	5	37	7	13	38	16	78		4933416E14Rik	RIKEN cDNA 4933416E14 gene	A	A	P	P	P	A	A	A	A	A	A	A	A
1439546_at	29	31	20	22	27	1839	1407	1192	1209	31	24	34	729		4933417O08Rik	RIKEN cDNA 4933417O08 gene	A	A	A	A	A	P	P	P	P	A	A	A	A
1453297_at	68	58	30	59	100	532	421	523	396	129	61	97	534		4933417O08Rik	RIKEN cDNA 4933417O08 gene	A	A	A	A	A	P	P	P	P	A	A	A	A
1428162_at	316	253	148	126	155	198	200	647	356	304	302	387	744		4933421E11Rik	RIKEN cDNA 4933421E11 gene	P	P	P	P	P	P	P	P	P	P	P	P	P
1430064_at	67	505	222	227	274	1437	1102	352	281	736	537	272	255		4933424A20Rik	RIKEN cDNA 4933424A20 gene	P	P	P	P	P	P	P	P	P	P	P	P	P
1419211_s_at	355	692	717	597	659	156	192	150	328	666	622	564	371		4933424B01Rik	RIKEN cDNA 4933424B01 gene	P	P	P	P	P	P	P	P	P	P	P	P	P
1429811_at	171	350	229	286	343	119	164	132	190	193	194	145	132		4933424B01Rik	RIKEN cDNA 4933424B01 gene	P	P	P	P	P	P	P	P	P	P	P	P	P
1455076_a_at	285	657	613	453	461	120	174	203	180	564	677	521	355		4933424B01Rik	RIKEN cDNA 4933424B01 gene	P	P	P	P	P	P	P	P	P	P	P	P	P
1436143_at	755	910	1302	1361	1083	1045	1163	874	939	1171	1952	3373	752		4933425L03Rik	RIKEN cDNA 4933425L03 gene	P	P	P	P	P	P	P	P	P	P	P	P	P
1429981_a_at	101	466	430	275	194	270	288	122	83	262	262	80	96		4933426K21Rik	RIKEN cDNA 4933426K21 gene	P	P	P	P	A	P	A	P	P	P	P	A	A
1429982_at	208	3620	2112	1230	896	2544	1374	500	378	1163	1169	393	328		4933426K21Rik	RIKEN cDNA 4933426K21 gene	P	P	P	P	P	P	P	P	P	P	P	P	P
1435532_at	87	96	264	86	60	500	293	124	127	87	130	54	77		4933426K21Rik	RIKEN cDNA 4933426K21 gene	P	P	P	P	A	P	P	P	P	P	P	A	P
1435533_s_at	255	218	340	234	171	737	522	147	163	223	220	141	198		4933426K21Rik	RIKEN cDNA 4933426K21 gene	P	P	P	P	P	P	P	P	P	P	P	A	P
1454606_at	3311	832	597	579	613	219	319	259	540	337	462	449	360		4933426M11Rik	RIKEN cDNA 4933426M11 gene	P	P	P	P	P	A	A	P	P	P	P	P	P
1433998_at	288	326	401	265	321	1222	664	820	514	609	398	425	596		4933427D14Rik	RIKEN cDNA 4933427D14 gene	P	P	P	P	P	P	P	P	P	P	P	P	P
1426253_at	438	399	562	418	472	301	382	527	339	450	340	373	419		4933428G09Rik	RIKEN cDNA 4933428G09 gene	P	P	P	P	P	P	P	P	P	P	P	P	P
1439675_at	32	143	241	474	830	15	9	6	33	44	19	6	93		4933429D07Rik	RIKEN cDNA 4933429D07 gene	A	A	A	P	P	A	A	A	A	A	A	A	A
1456563_at	185	73	30	111	188	72	69	52	56	2	71	445	129		4933429F08Rik	RIKEN cDNA 4933429F08 gene	P	A	A	P	P	A	A	A	A	A	A	P	P
1434868_at	151	562	498	1007	1177	168	203	295	175	190	174	347	226		4933431E20Rik	RIKEN cDNA 4933431E20 gene	P	P	P	P	P	P	A	P	A	P	P	P	P
1433700_at	2369	928	988	1737	1999	715	790	1809	1671	852	1018	1592	2176		4933433P14Rik	RIKEN cDNA 4933433P14 gene	P	P	P	P	P	P	P	P	P	P	P	P	P
1435422_at	310	309	228	308	386	480	216	461	220	219	213	313	438		4933433P14Rik	RIKEN cDNA 4933433P14 gene	P	A	P	P	A	P	P	P	P	P	A	A	P
1435423_x_at	1207	1030	746	1151	1754	3049	721	1504	952	876	850	997	2371		4933433P14Rik	RIKEN cDNA 4933433P14 gene	P	P	P	P	P	P	P	P	P	P	P	P	P
1448463_at	3795	2352	2404	2175	2090	1816	2408	2904	2335	2567	3710	2991	2208		4933434E20Rik	RIKEN cDNA 4933434E20 gene	P	P	P	P	P	P	P	P	P	P	P	P	P
1453733_a_at	569	447	458	381	461	383	458	450	400	555	609	500	399		4933434E20Rik	RIKEN cDNA 4933434E20 gene	P	P	P	P	P	P	P	P	P	P	P	P	P
1452075_at	328	531	311	225	275	304	243	204	221	350	324	268	240		4933435A13Rik	RIKEN cDNA 4933435A13 gene	P	P	P	P	P	P	A	P	P	P	P	A	P
1438437_a_at	155	552	734	707	812	812	610	664	485	789	269	24	208		4933439C10Rik	RIKEN cDNA 4933439C10 gene	P	P	P	P	P	P	P	P	P	P	P	A	A
1452696_a_at	141	522	634	516	602	621	596	411	394	638	184	11	87		4933439C10Rik	RIKEN cDNA 4933439C10 gene	P	P	P	P	P	P	P	P	P	P	P	A	P
1429452_x_at	62	242	272	219	168	30	321	499	160	1076	1599	536	15		4933439C20Rik	RIKEN cDNA 4933439C20 gene	A	A	A	A	A	A	A	A	A	A	P	P	A
1434975_x_at	4435	7180	5792	6667	6692	18650	12809	12397	8649	9857	10993	5062	6734		4933439C20Rik	RIKEN cDNA 4933439C20 gene	P	P	P	P	P	P	P	P	P	P	P	P	P
1435353_a_at	501	567	779	1000	1175	1873	1927	1853	1463	1837	2480	997	331		4933439C20Rik	RIKEN cDNA 4933439C20 gene	P	P	P	P	P	P	P	P	P	P	P	P	P
1436944_x_at	3952	5343	4842	3881	5762	17638	11658	18086	10499	8633	9697	4492	6012		4933439C20Rik	RIKEN cDNA 4933439C20 gene	P	P	P	P	P	P	P	P	P	P	P	P	P
1439069_a_at	1841	2062	2159	2218	3018	5416	4490	5014	4030	4414	3464	1707	1791		4933439C20Rik	RIKEN cDNA 4933439C20 gene	P	P	P	P	P	P	P	P	P	P	P	P	P
1453144_at	38	91	199	108	190	105	124	133	107	622	1054	308	51		4933439C20Rik	RIKEN cDNA 4933439C20 gene	A	P	P	A	A	A	P	P	P	P	P	P	A
1453145_at	449	2012	1055	1125	1786	4676	3641	2592	1867	3036	3683	1547	453		4933439C20Rik	RIKEN cDNA 4933439C20 gene	P	P	P	P	P	P	P	P	P	P	P	P	P
1454566_at	45	74	88	130	164	872	347	330	203	363	477	264	28		4933439C20Rik /// D030013I16Rik	RIKEN cDNA 4933439C20 gene /// RIKEN cDNA D030013I16 gene	A	A	A	A	A	P	A	A	A	A	P	A	A
1439070_x_at	277	265	356	382	391	566	743	638	483	590	588	330	291		4933439C20Rik /// D030013I16Rik	RIKEN cDNA 4933439C20 gene /// RIKEN cDNA D030013I16 gene	P	P	P	P	A	P	P	P	P	P	P	P	P
1426387_x_at	3301	4513	4952	4177	4707	13342	9379	7823	6222	5857	7220	3112	4181		4933439C20Rik /// Pisd	RIKEN cDNA 4933439C20 gene /// phosphatidylserine decarboxylase	P	P	P	P	P	P	P	P	P	P	P	P	P
1435426_s_at	49	32	48	69	42	303	239	247	184	177	136	27	57		4933439C20Rik /// Pisd	RIKEN cDNA 4933439C20 gene /// phosphatidylserine decarboxylase	A	A	A	A	A	P	P	P	P	A	A	A	A
1427065_at	109	131	92	112	136	80	119	32	168	195	161	206	124		4933439F18Rik	RIKEN cDNA 4933439F18 gene	A	A	A	A	A	A	A	P	P	P	A	P	P
1427066_a_at	613	440	550	929	931	722	579	723	628	850	773	1061	692		4933439F18Rik	RIKEN cDNA 4933439F18 gene	P	P	P	P	P	P	P	P	P	P	P	P	P
1438006_at	696	348	529	902	885	939	856	687	688	1060	1082	889	1042		4933439F18Rik	RIKEN cDNA 4933439F18 gene	P	P	P	P	P	P	P	P	P	P	P	P	P
1429070_at	154	83	156	179	251	84	164	214	100	167	155	137	173		4933440H19Rik	RIKEN cDNA 4933440H19 gene	P	A	A	P	P	A	A	P	A	P	P	A	P
1429955_at	111	116	173	217	247	172	136	134	141	272	290	309	63		5031434O11Rik	RIKEN cDNA 5031434O11 gene	A	P	P	A	A	P	P	P	P	P	P	P	A
1435745_at	689	1180	1024	2255	2175	2983	2665	895	1055	2954	12959	20283	3687		5031439G07Rik	RIKEN cDNA 5031439G07 gene	P	P	P	P	P	P	P	P	P	P	P	P	P
1454786_at	341	239	319	865	676	1046	1017	622	594	687	1187	3202	446		5031439G07Rik	RIKEN cDNA 5031439G07 gene	P	A	P	P	P	P	P	P	P	P	P	P	P
1432336_at	52	164	184	196	208	75	58	25	432	42	38	66	108		5033404E19Rik	RIKEN cDNA 5033404E19 gene	A	P	P	P	P	A	A	A	P	A	A	A	A
1452286_at	2189	1573	1020	1762	1934	3009	2163	1130	1867	1773	1941	2511	1399		5033405K12Rik	RIKEN cDNA 5033405K12 gene	P	P	P	P	P	P	P	P	P	P	P	P	P
1457457_at	54	139	103	86	90	266	189	181	100	98	76	44	129		5033405K12Rik	RIKEN cDNA 5033405K12 gene	A	A	P	A	A	P	P	P	P	P	A	A	P
1460361_at	914	673	994	740	653	327	626	376	358	1563	904	426	403		5033414D02Rik	RIKEN cDNA 5033414D02 gene	P	P	P	P	P	P	P	P	P	P	P	P	P
1436999_at	2081	667	1533	1471	1495	1079	1485	1590	1607	7669	1941	158	1106		5033414K04Rik	RIKEN cDNA 5033414K04 gene	P	P	P	P	P	P	P	P	P	P	P	P	P
1440790_x_at	50	142	48	27	68	5	8	41	12	283	125	15	8		5033414K04Rik	RIKEN cDNA 5033414K04 gene	A	P	A	A	A	A	A	A	A	P	P	A	A
1451652_a_at	3227	2762	2622	2414	2721	1629	1462	2282	1585	2348	2624	3183	2188		5033428A16Rik	RIKEN cDNA 5033428A16 gene	P	P	P	P	P	P	P	P	P	P	P	P	P
1452813_a_at	2671	2930	1873	2427	2599	1180	1041	1307	1564	2458	2401	3481	2295		5033428A16Rik	RIKEN cDNA 5033428A16 gene	P	P	P	P	P	P	P	P	P	P	P	P	P
1432509_at	142	131	143	92	35	313	537	412	277	77	11	10	186		5033430I15Rik	RIKEN cDNA 5033430I15 gene	P	P	P	P	A	P	P	P	P	A	A	A	P
1430023_at	284	243	265	271	207	83	134	171	133	135	116	274	180		5133400G04Rik	RIKEN cDNA 5133400G04 gene	P	A	P	P	A	A	A	A	A	A	P	P	P
1428663_at	807	145	66	48	51	6	43	102	627	42	431	363	122		5133401H06Rik	RIKEN cDNA 5133401H06 gene	P	P	P	A	A	A	P	P	P	A	P	P	P
1424496_at	1365	748	990	1308	1107	585	991	1048	973	1116	768	1161	783		5133401N09Rik	RIKEN cDNA 5133401N09 gene	P	P	P	P	P	P	P	P	P	P	P	P	P
1456736_x_at	16118	26603	16282	20500	21225	25569	18284	21170	16213	11179	15767	18096	24214		5230400G24Rik	RIKEN cDNA 5230400G24 gene	P	P	P	P	P	P	P	P	P	P	P	P	P
1451572_a_at	2750	2229	3212	4192	3542	3538	3297	4197	4302	3393	3423	3147	3903		5230400G24Rik /// LOC637796	RIKEN cDNA 5230400G24 gene /// hypothetical protein LOC637796	P	P	P	P	P	P	P	P	P	P	P	P	P
1456582_x_at	392	708	381	287	595	784	379	1547	409	315	404	454	621		5230400G24Rik /// LOC637796	RIKEN cDNA 5230400G24 gene /// hypothetical protein LOC637796	P	P	P	P	P	P	P	P	P	P	P	P	P
1435728_at	112	103	139	138	172	176	169	231	238	206	70	99	217		5230400J09Rik	RIKEN cDNA 5230400J09 gene	P	P	P	P	P	P	P	P	P	P	P	P	P
1441843_s_at	81	617	188	285	327	101	79	81	64	279	687	216	23		5230400M03Rik	RIKEN cDNA 5230400M03 gene	A	P	P	P	P	P	A	A	P	P	P	P	A
1455553_at	75	312	195	102	33	143	99	170	83	396	275	225	17		5330401P04Rik	RIKEN cDNA 5330401P04 gene	A	P	P	A	A	A	A	A	A	P	P	A	A
1429900_at	204	220	122	421	660	162	63	173	151	260	121	66	119		5330406M23Rik	RIKEN cDNA 5330406M23 gene	P	P	P	P	P	P	P	A	P	P	P	A	P
1427342_at	446	325	383	361	633	441	414	488	379	468	351	335	567		5330408N05Rik	RIKEN cDNA 5330408N05 gene	P	P	P	P	P	P	P	P	P	P	P	P	P
1452825_at	261	186	125	138	199	1090	1680	2943	2531	667	376	90	1281		5330410G16Rik	RIKEN cDNA 5330410G16 gene	P	P	P	P	P	P	P	P	P	P	P	P	P
1427063_at	49	110	55	47	68	364	419	626	361	81	33	47	300		5330417C22Rik	RIKEN cDNA 5330417C22 gene	A	P	P	A	A	P	P	P	P	A	A	A	P
1442113_at	9	41	3	14	29	354	158	277	178	5	16	34	142		5330417C22Rik	RIKEN cDNA 5330417C22 gene	A	A	A	A	A	P	P	P	P	A	A	A	P
1439096_at	1729	94	315	702	407	30	35	134	77	22	4	7	223		5330420D20Rik	RIKEN cDNA 5330420D20 gene	P	P	P	P	P	A	P	A	A	A	A	A	P
1451650_at	613	22	118	190	105	5	13	55	36	22	30	23	52		5330420D20Rik	RIKEN cDNA 5330420D20 gene	P	A	P	P	P	A	P	A	A	A	A	A	A
1441353_at	24	46	10	17	16	57	7	2	17	374	392	24	29		5330421F07Rik	RIKEN cDNA 5330421F07 gene	A	A	A	A	A	A	A	A	A	P	P	A	A
1430030_at	384	587	335	281	185	435	308	164	230	9	782	1107	326		5330426P16Rik	RIKEN cDNA 5330426P16 gene	P	P	P	P	P	P	P	P	P	A	P	P	P
1440231_at	940	1203	970	1432	2490	10868	5558	5573	4229	727	338	246	6377		5330427D05Rik	RIKEN cDNA 5330427D05 gene	P	P	P	P	P	P	P	P	P	P	P	P	P
1441961_at	48	109	69	55	87	799	409	193	269	26	30	11	354		5330427D05Rik	RIKEN cDNA 5330427D05 gene	A	P	A	P	P	P	P	P	P	A	A	A	P
1430033_at	55	99	17	18	31	190	217	150	141	25	352	144	78		5330431K02Rik	RIKEN cDNA 5330431K02 gene	A	P	A	A	A	P	P	P	P	A	P	P	A
1452603_at	2353	812	1249	1344	948	1679	2407	3149	2616	1014	1197	1778	2894		5330431N19Rik	RIKEN cDNA 5330431N19 gene	P	P	P	P	P	P	P	P	P	P	P	P	P
1437265_at	112	155	170	124	159	300	316	365	288	203	145	160	248		5330438D12Rik	RIKEN cDNA 5330438D12 gene	P	P	P	P	P	P	P	P	P	P	P	P	P
1427542_at	70	92	58	168	33	545	519	238	437	311	104	43	373		5330439J01Rik	RIKEN cDNA 5330439J01 gene	A	A	A	A	A	P	A	P	A	A	A	A	A
1436250_at	58	130	122	106	143	289	473	253	170	129	70	44	167		5430405G05Rik	RIKEN cDNA 5430405G05 gene	A	A	P	P	A	P	P	P	P	P	A	A	P
1424666_at	390	567	457	607	541	691	403	409	399	724	706	952	235		5430405G24Rik	RIKEN cDNA 5430405G24 gene	P	P	P	P	P	P	P	P	P	P	P	P	P
1451434_s_at	336	331	289	431	477	995	475	552	535	596	617	680	566		5430405G24Rik	RIKEN cDNA 5430405G24 gene	P	P	P	P	P	P	P	P	P	P	P	P	P
1429691_at	94	163	145	78	46	100	95	142	165	3250	1378	87	92		5430405N12Rik	RIKEN cDNA 5430405N12 gene	A	P	P	P	A	P	P	P	P	P	P	A	A
1456070_at	379	1233	966	690	926	735	731	810	1288	2256	1114	83	614		5430405N12Rik	RIKEN cDNA 5430405N12 gene	P	P	P	P	P	P	P	P	P	P	P	A	P
1456210_at	53	88	76	91	108	133	109	100	222	57	71	19	213		5430407P10Rik	RIKEN cDNA 5430407P10 gene	A	P	P	A	P	P	P	P	P	A	P	A	P
1428419_at	519	536	511	673	621	990	654	1034	1145	602	727	863	870		5430411K18Rik	RIKEN cDNA 5430411K18 gene	P	P	P	P	P	P	P	P	P	P	P	P	P
1430489_at	46	13	20	44	35	3	29	1	34	14	125	245	46		5430416G10Rik	RIKEN cDNA 5430416G10 gene	A	A	A	A	A	A	A	A	A	A	P	P	P
1439071_at	147	361	239	186	179	335	432	346	256	278	409	349	325		5430416N02Rik	RIKEN cDNA 5430416N02 gene	A	P	P	P	P	P	P	P	P	P	P	P	P
1426987_at	699	365	255	367	408	195	225	408	227	381	247	251	279		5430417L22Rik	RIKEN cDNA 5430417L22 gene	P	P	P	P	P	P	P	P	P	P	P	A	P
1434756_at	379	235	382	819	1014	91	149	120	863	163	92	39	315		5430421B17	hypothetical protein 5430421B17	P	P	P	P	P	A	P	P	P	P	A	A	P
1431110_at	418	380	405	259	212	267	168	212	315	205	114	270	252		5430431D22Rik	RIKEN cDNA 5430431D22 gene	P	P	P	P	P	P	P	P	P	P	A	P	P
1453768_a_at	177	113	105	22	12	116	133	96	146	224	22	16	60		5430432M24Rik	RIKEN cDNA 5430432M24 gene	P	A	P	A	A	A	A	P	P	P	A	A	A
1436987_at	16	3	3	5	8	31	15	10	233	3	6	13	63		5430433G21Rik	RIKEN cDNA 5430433G21 gene	A	A	A	A	A	A	A	A	P	A	A	A	P
1432850_at	73	623	145	114	125	303	100	16	209	286	165	136	26		5430434G16Rik	RIKEN cDNA 5430434G16 gene	A	P	P	P	A	P	A	P	P	P	P	A	A
1424987_at	459	154	234	325	333	55	57	50	63	48	1370	3548	417		5430435G22Rik	RIKEN cDNA 5430435G22 gene	P	P	P	P	P	A	A	A	A	A	P	P	P
1435830_a_at	147	46	124	120	143	6	6	13	18	18	436	1341	21		5430435G22Rik	RIKEN cDNA 5430435G22 gene	P	A	A	P	P	A	A	A	A	A	P	P	A
1424073_at	1751	1045	1564	1425	1238	967	2010	2082	2192	2052	1613	1670	1414		5430437P03Rik	RIKEN cDNA 5430437P03 gene	P	P	P	P	P	P	P	P	P	P	P	P	P
1453036_at	190	272	237	246	209	161	134	283	170	318	278	131	164		5430439M09Rik	RIKEN cDNA 5430439M09 gene	P	P	P	P	P	P	P	P	P	P	P	P	P
1433174_a_at	84	219	154	204	202	367	196	195	180	392	211	150	149		5430440L12Rik	RIKEN cDNA 5430440L12 gene	P	P	P	P	P	P	P	P	P	P	P	P	P
1428864_at	260	1039	446	389	261	3235	2422	2117	1403	1421	812	1125	1631		5530400B01Rik	RIKEN cDNA 5530400B01 gene	A	P	P	A	A	P	P	P	P	P	P	P	P
1428796_at	736	430	243	231	266	155	114	111	174	218	334	578	237		5530401J07Rik	RIKEN cDNA 5530401J07 gene	P	P	P	P	P	P	P	P	P	P	P	P	P
1436347_a_at	196	292	243	233	193	164	181	187	178	321	279	373	156		5530601H04Rik	RIKEN cDNA 5530601H04 gene	P	P	P	P	P	P	P	P	P	P	P	P	P
1452750_at	342	587	416	593	345	358	515	517	492	805	463	514	471		5530601H04Rik	RIKEN cDNA 5530601H04 gene	P	P	P	P	P	P	P	P	P	P	P	P	P
1428691_at	837	2461	993	856	892	1066	725	448	730	1197	950	624	1013		5630401D06Rik	RIKEN cDNA 5630401D06 gene	P	P	P	P	P	P	P	P	P	P	P	P	P
1460050_x_at	274	190	162	145	230	351	229	259	208	300	239	261	277		5630401D24Rik	RIKEN cDNA 5630401D24 gene	P	P	P	A	A	P	P	P	A	P	P	A	P
1460656_a_at	3001	3074	2486	3904	3131	3115	1707	1533	2469	2934	3779	6012	2186		5630401J11Rik	RIKEN cDNA 5630401J11 gene	P	P	P	P	P	P	P	P	P	P	P	P	P
1447951_at	106	648	347	455	351	343	155	119	163	405	391	363	36		5730403B10Rik	RIKEN cDNA 5730403B10 gene	P	P	P	P	P	P	P	P	P	P	P	P	A
1448193_at	444	555	847	829	927	489	633	1749	1152	735	811	1770	866		5730403B10Rik	RIKEN cDNA 5730403B10 gene	P	P	P	P	P	P	P	P	P	P	P	P	P
1460172_at	2149	2708	3576	4714	4576	1202	1301	1520	1778	2882	3868	7813	1963		5730403B10Rik	RIKEN cDNA 5730403B10 gene	P	P	P	P	P	P	P	P	P	P	P	P	P
1434343_at	199	202	169	148	193	275	349	313	303	291	222	352	337		5730403M16Rik	RIKEN cDNA 5730403M16 gene	P	P	P	P	P	P	P	P	P	P	P	P	P
1428413_at	869	385	673	547	428	555	1092	1345	1051	693	1560	1142	1029		5730405I09Rik	RIKEN cDNA 5730405I09 gene	P	P	P	P	P	P	P	P	P	P	P	P	P
1428971_at	3086	2750	2633	2825	2419	1158	1619	1557	2972	2733	4340	1747	3197		5730405I09Rik	RIKEN cDNA 5730405I09 gene	P	P	P	P	P	P	P	P	P	P	P	P	P
1432352_at	38	212	37	73	70	93	26	25	60	173	228	59	26		5730405I09Rik	RIKEN cDNA 5730405I09 gene	A	P	P	P	P	P	A	P	P	P	P	A	A
1452984_at	699	1009	561	721	802	2107	1457	1313	1485	725	1431	617	1844		5730405I09Rik	RIKEN cDNA 5730405I09 gene	P	P	P	P	P	P	P	P	P	P	P	P	P
1429537_at	176	835	528	758	772	691	233	83	209	614	477	471	172		5730406M06Rik	RIKEN cDNA 5730406M06 gene	A	P	P	P	P	P	A	P	A	P	P	P	A
1429538_a_at	353	3363	3279	2409	3329	588	890	458	676	2815	1829	1411	281		5730406M06Rik	RIKEN cDNA 5730406M06 gene	P	P	P	P	P	P	P	P	P	P	P	P	P
1435079_at	665	4682	3334	3521	4030	1908	912	1207	801	2949	2448	1977	293		5730406M06Rik	RIKEN cDNA 5730406M06 gene	P	P	P	P	P	P	P	P	P	P	P	P	P
1435080_x_at	602	3981	3249	3529	4056	1714	792	888	788	2942	2160	1716	343		5730406M06Rik	RIKEN cDNA 5730406M06 gene	P	P	P	P	P	P	P	P	P	P	P	P	P
1437041_at	577	2988	1677	922	1239	2308	1581	1298	1186	2276	1145	612	1091		5730406M06Rik	RIKEN cDNA 5730406M06 gene	P	P	P	P	P	P	P	P	P	P	P	P	P
1453185_at	189	880	925	706	767	363	216	90	378	839	703	542	243		5730406M06Rik	RIKEN cDNA 5730406M06 gene	A	P	P	P	P	P	A	P	P	P	P	P	P
1453186_at	191	2025	1843	921	1593	248	440	271	339	987	953	717	173		5730406M06Rik	RIKEN cDNA 5730406M06 gene	P	P	P	P	P	P	P	P	P	P	P	P	P
1432916_at	144	41	91	169	199	4	19	7	3	347	110	25	52		5730407I07Rik	RIKEN cDNA 5730407I07 gene	P	A	P	P	P	A	A	A	A	P	P	A	A
1427070_at	197	96	284	310	241	216	639	576	383	213	101	95	212		5730407K14Rik	RIKEN cDNA 5730407K14 gene	P	A	P	P	P	P	P	P	P	P	A	A	P
1432393_a_at	171	151	164	107	108	182	195	148	136	102	83	76	166		5730409G07Rik	RIKEN cDNA 5730409G07 gene	P	A	A	A	A	P	P	P	P	A	A	A	A
1438667_at	1500	4014	2521	2965	3079	7636	8123	5144	3508	1228	466	93	3860		5730410E15Rik	RIKEN cDNA 5730410E15 gene	P	P	P	P	P	P	P	P	P	P	P	A	P
1447609_at	90	3568	658	514	458	804	295	151	120	371	152	41	107		5730410E15Rik	RIKEN cDNA 5730410E15 gene	A	P	P	P	P	P	P	P	A	P	P	A	A
1454616_at	1679	1525	1687	2237	2670	954	1077	911	919	1316	693	835	1112		5730410I19Rik	RIKEN cDNA 5730410I19 gene	P	P	P	P	P	P	P	P	P	P	P	P	P
1428948_at	31	78	148	365	320	399	324	476	298	390	154	63	661		5730414M22Rik	RIKEN cDNA 5730414M22 gene	P	P	P	P	P	P	P	P	P	P	P	P	P
1429899_at	17	153	272	352	332	4	24	53	65	34	94	56	75		5730414N17Rik	RIKEN cDNA 5730414N17 gene	A	P	P	P	P	A	A	A	P	A	P	A	P
1428220_at	287	431	441	377	370	1135	688	927	659	889	431	251	778		5730419I09Rik	RIKEN cDNA 5730419I09 gene	P	P	P	P	P	P	P	P	P	P	P	P	P
1427050_at	926	1468	1753	1886	1435	1016	1133	1581	1181	3213	4433	6583	1931		5730420B22Rik	RIKEN cDNA 5730420B22 gene	P	P	P	P	P	P	P	P	P	P	P	P	P
1423132_a_at	464	312	722	423	316	287	709	378	537	649	619	553	363		5730427N09Rik /// LOC433230 /// LOC636306	RIKEN cDNA 5730427N09 gene /// similar to TGF beta-inducible nuclear protein 1 (L-name-related protein 42) (LNR42) /// similar to TGF beta-inducible nuclear protein 1 (L-name related LNR42)	P	P	P	P	P	P	P	P	P	P	P	P	P
1454460_at	18	120	167	241	242	47	26	17	32	329	118	27	39		5730433N10Rik	RIKEN cDNA 5730433N10 gene	A	P	A	P	P	P	A	A	A	P	P	A	A
1424045_at	1253	778	2051	1654	1467	444	1398	1146	1128	801	861	811	1180		5730437N04Rik	RIKEN cDNA 5730437N04 gene	P	P	P	P	P	P	P	P	P	P	P	P	P
1453591_at	111	565	216	217	224	243	120	185	175	432	357	367	89		5730437N04Rik	RIKEN cDNA 5730437N04 gene	P	P	P	P	P	P	P	P	P	P	P	P	P
1424211_at	1973	828	2256	4647	5960	732	995	1889	1801	351	665	516	1740		5730438N18Rik	RIKEN cDNA 5730438N18 gene	P	P	P	P	P	P	P	P	P	P	P	P	P
1433738_at	1550	3270	1747	1689	1839	4617	2720	2114	2475	2496	1414	885	2990		5730445M16Rik	RIKEN cDNA 5730445M16 gene	P	P	P	P	P	P	P	P	P	P	P	P	P
1433771_at	1047	3362	2303	1668	2611	1660	1189	1456	750	2302	4476	7537	2274		5730446C15Rik	RIKEN cDNA 5730446C15 gene	P	P	P	P	P	P	P	P	P	P	P	P	P
1454724_x_at	2574	7284	4320	4272	5772	3910	2419	2795	2134	5669	9675	15457	5027		5730446C15Rik	RIKEN cDNA 5730446C15 gene	P	P	P	P	P	P	P	P	P	P	P	P	P
1460138_at	37	393	107	111	151	49	43	20	45	114	252	333	49		5730446C15Rik	RIKEN cDNA 5730446C15 gene	A	P	P	P	P	P	A	P	A	P	P	P	A
1449933_a_at	711	577	783	517	584	300	510	570	605	604	189	30	512		5730449L18Rik	RIKEN cDNA 5730449L18 gene	P	P	P	P	P	P	P	P	P	P	P	A	P
1415730_at	993	2551	1603	1651	1536	2027	1361	1298	1346	2555	1702	1438	1233		5730453I16Rik	RIKEN cDNA 5730453I16 gene	P	P	P	P	P	P	P	P	P	P	P	P	P
1435810_at	512	409	483	556	590	661	729	614	600	456	438	454	685		5730455O13Rik	RIKEN cDNA 5730455O13 gene	P	P	P	P	P	P	P	P	P	P	P	P	P
1456419_at	377	532	275	535	530	519	482	537	486	310	325	457	623		5730455P16Rik	RIKEN cDNA 5730455P16 gene	P	P	P	P	P	P	P	P	P	P	P	P	P
1453064_at	130	373	270	140	168	150	101	163	94	105	88	96	116		5730466H23Rik	RIKEN cDNA 5730466H23 gene	P	P	P	P	P	P	P	P	P	P	P	P	P
1438408_at	28	302	23	23	33	171	138	553	398	34	54	10	600		5730467H21Rik	RIKEN cDNA 5730467H21 gene	A	P	A	A	A	P	P	P	P	A	A	A	P
1447774_x_at	1575	3769	3918	4838	4982	3412	1503	2766	1360	1391	1087	1746	2821		5730469M10Rik	RIKEN cDNA 5730469M10 gene	P	P	P	P	P	P	P	P	P	P	P	P	P
1452716_at	4195	7095	11293	19521	12077	7232	4408	4044	3546	4263	3069	4198	6270		5730469M10Rik	RIKEN cDNA 5730469M10 gene	P	P	P	P	P	P	P	P	P	P	P	P	P
1422594_at	693	1001	892	695	641	890	803	594	832	1096	1154	1179	640		5730470L24Rik	RIKEN cDNA 5730470L24 gene	P	P	P	P	P	P	P	P	P	P	P	P	P
1422595_s_at	938	1563	1308	1033	895	794	972	685	997	1459	1645	1681	924		5730470L24Rik	RIKEN cDNA 5730470L24 gene	P	P	P	P	P	P	P	P	P	P	P	P	P
1450679_at	328	324	374	258	257	101	198	167	159	219	170	189	128		5730470L24Rik	RIKEN cDNA 5730470L24 gene	P	P	P	A	A	A	P	P	P	P	A	A	P
1433493_at	535	353	483	806	884	349	475	916	662	501	545	709	448		5730472N09Rik	RIKEN cDNA 5730472N09 gene	P	P	P	P	P	P	P	P	P	P	P	P	P
1449714_at	2257	988	1884	3020	3614	1193	1639	2160	1848	1550	1830	2040	1858		5730472N09Rik	RIKEN cDNA 5730472N09 gene	P	P	P	P	P	P	P	P	P	P	P	P	P
1454621_s_at	804	383	868	1253	1435	606	906	1192	914	563	763	947	828		5730472N09Rik	RIKEN cDNA 5730472N09 gene	P	P	P	P	P	P	P	P	P	P	P	P	P
1430665_at	97	392	174	218	218	115	52	23	75	222	156	93	16		5730480H06Rik	RIKEN cDNA 5730480H06 gene	A	P	P	P	P	A	A	A	A	A	A	A	A
1428189_at	817	926	934	689	790	1170	1314	1135	897	824	721	699	901		5730494M16Rik	RIKEN cDNA 5730494M16 gene	P	P	P	P	P	P	P	P	P	P	P	P	P
1441960_x_at	1146	1544	968	911	1274	1965	1545	1907	1254	856	986	1192	1581		5730494M16Rik	RIKEN cDNA 5730494M16 gene	P	P	P	P	P	P	P	P	P	P	P	P	P
1453079_at	95	113	101	101	104	127	252	255	202	178	81	58	154		5730494M16Rik	RIKEN cDNA 5730494M16 gene	A	A	P	P	A	P	P	P	P	A	A	A	A
1459875_x_at	445	721	399	371	534	943	612	1027	502	320	378	465	752		5730494M16Rik	RIKEN cDNA 5730494M16 gene	P	P	P	P	P	P	P	P	P	P	P	P	P
1452773_at	3789	2344	2046	2381	2659	2232	1983	2657	2241	2367	3757	4218	2273		5730494N06Rik	RIKEN cDNA 5730494N06 gene	P	P	P	P	P	P	P	P	P	P	P	P	P
1429910_at	392	479	557	473	478	685	864	413	439	489	271	179	413		5730499H23Rik	RIKEN cDNA 5730499H23 gene	P	P	P	P	P	P	P	P	P	P	P	P	P
1425161_a_at	285	176	231	181	199	178	186	215	229	324	279	332	210		5730502D15Rik	RIKEN cDNA 5730502D15 gene	P	P	P	P	A	P	A	P	P	P	P	P	A
1428093_at	338	249	305	244	315	220	245	206	296	555	467	348	156		5730502D15Rik	RIKEN cDNA 5730502D15 gene	P	P	P	P	P	A	A	P	P	P	P	P	A
1433945_at	15	26	54	15	5	1600	1336	2066	1568	925	415	138	1118		5730507A09Rik	RIKEN cDNA 5730507A09 gene	A	A	A	A	A	P	P	P	P	P	P	P	P
1457642_at	230	519	304	290	292	135	101	76	60	129	66	68	90		5730507N06Rik	RIKEN cDNA 5730507N06 gene	P	P	P	P	P	P	P	P	A	P	A	A	P
1429678_at	303	1509	577	436	449	1634	1172	501	635	541	1144	1309	583		5730508B09Rik	RIKEN cDNA 5730508B09 gene	P	P	P	P	P	P	P	P	P	P	P	P	P
1437298_at	591	700	440	996	713	546	457	984	780	840	556	695	933		5730509C05Rik	RIKEN cDNA 5730509C05 gene	P	P	P	P	P	P	P	P	P	P	P	P	P
1436426_at	981	968	821	1851	1290	321	238	296	287	1626	598	245	406		5730509K17Rik	RIKEN cDNA 5730509K17 gene	P	P	P	P	P	P	P	P	P	P	P	P	P
1416633_a_at	2390	3087	2558	2216	3294	1277	828	1380	1245	2500	2547	2137	1902		5730536A07Rik	RIKEN cDNA 5730536A07 gene	P	P	P	P	P	P	P	P	P	P	P	P	P
1416634_at	1737	1217	1732	1298	1726	632	620	648	746	1693	1765	1757	1007		5730536A07Rik	RIKEN cDNA 5730536A07 gene	P	P	P	P	P	P	P	P	P	P	P	P	P
1453287_at	64	130	45	43	51	78	94	252	332	51	73	36	191		5730557B15Rik	RIKEN cDNA 5730557B15 gene	A	P	A	A	A	P	P	P	P	A	A	A	P
1434933_at	976	1210	742	1180	978	1106	825	863	993	1660	1957	2240	1177		5730557L09Rik	RIKEN cDNA 5730557L09 gene	P	P	P	P	P	P	P	P	P	P	P	P	P
1436345_at	147	227	98	97	46	83	35	90	19	2674	1033	224	149		5730559C18Rik	RIKEN cDNA 5730559C18 gene	A	P	A	A	A	A	A	A	A	P	P	P	A
1416574_at	833	645	645	478	498	826	1120	1145	1005	1019	1048	1287	906		5730589K01Rik	RIKEN cDNA 5730589K01 gene	P	P	P	P	P	P	P	P	P	P	P	P	P
1436049_at	392	382	368	389	391	299	318	239	377	634	632	564	336		5730589K01Rik	RIKEN cDNA 5730589K01 gene	P	P	P	P	P	P	P	P	P	P	P	P	P
1433639_at	307	383	384	329	321	50	78	129	129	287	158	161	128		5730593F17Rik	RIKEN cDNA 5730593F17 gene	P	P	P	P	P	P	P	P	P	P	P	P	P
1451857_a_at	274	350	261	267	202	59	197	132	645	64	80	77	67		5730593N15Rik	RIKEN cDNA 5730593N15 gene	P	P	P	P	P	A	A	P	P	A	A	A	P
1451376_at	215	91	122	129	149	93	99	153	149	145	211	453	111		5730596K20Rik	RIKEN cDNA 5730596K20 gene	P	P	P	P	A	P	P	A	P	P	P	P	P
1435890_at	1162	562	343	312	350	240	262	179	399	479	1168	1580	400		5730596K20Rik	RIKEN cDNA 5730596K20 gene	P	P	P	P	P	P	P	P	P	P	P	P	P
1434084_at	2493	2872	2177	2104	2094	4479	2290	2002	1490	2682	2641	3332	1915		5730601F06Rik	RIKEN cDNA 5730601F06 gene	P	P	P	P	P	P	P	P	P	P	P	P	P
1454812_at	134	179	138	163	243	101	139	87	108	234	272	354	114		5730601F06Rik	RIKEN cDNA 5730601F06 gene	P	P	P	P	P	P	P	P	P	P	P	P	P
1457913_at	113	313	236	221	257	218	120	95	71	428	300	206	24		5730601F06Rik	RIKEN cDNA 5730601F06 gene	P	P	P	P	P	P	P	P	P	P	P	P	A
1444051_at	120	184	191	388	435	458	296	848	531	658	250	168	661		5830405N20Rik	RIKEN cDNA 5830405N20 gene	P	P	P	P	P	P	P	P	P	P	P	P	P
1453512_at	72	1012	148	147	173	419	129	108	117	303	259	323	8		5830407P18Rik	RIKEN cDNA 5830407P18 gene	P	P	P	P	P	P	A	P	A	P	P	P	A
1429896_at	2112	451	340	275	317	463	342	323	454	162	155	52	408		5830408B19Rik	RIKEN cDNA 5830408B19 gene	P	P	P	P	P	P	P	P	P	P	P	P	P
1452203_at	586	118	94	80	120	775	322	782	396	230	119	147	595		5830411E10Rik	RIKEN cDNA 5830411E10 gene	P	P	P	A	P	P	P	P	P	P	P	P	P
1434659_at	1416	2509	1786	2426	2890	3001	1392	1768	1511	1724	1885	2033	2552		5830411G16Rik	RIKEN cDNA 5830411G16 gene	P	P	P	P	P	P	P	P	P	P	P	P	P
1452873_at	120	209	164	164	223	207	163	329	170	173	110	175	309		5830415F09Rik	RIKEN cDNA 5830415F09 gene	A	P	P	A	P	P	P	P	P	A	A	P	P
1426279_at	1257	1994	1672	1277	1453	1288	1366	1995	1522	1829	1778	1592	1732		5830415L20Rik	RIKEN cDNA 5830415L20 gene	P	P	P	P	P	P	P	P	P	P	P	P	P
1418006_at	330	582	320	280	248	302	322	286	393	408	383	421	262		5830416A07Rik	RIKEN cDNA 5830416A07 gene	P	P	P	P	P	P	P	P	P	P	P	P	P
1425185_at	3917	4472	5991	7394	7477	4158	2162	1506	1862	4888	2260	1139	2346		5830417C01Rik	RIKEN cDNA 5830417C01 gene	P	P	P	P	P	P	P	P	P	P	P	P	P
1451621_at	545	889	911	1451	1622	395	326	230	369	957	521	289	368		5830417C01Rik	RIKEN cDNA 5830417C01 gene	P	P	P	P	P	P	P	P	P	P	P	P	P
1430660_at	38	48	24	25	28	31	30	24	61	148	126	246	36		5830417I10Rik	RIKEN cDNA 5830417I10 gene	A	A	A	A	A	A	A	A	A	A	P	P	A
1430680_a_at	182	398	309	330	376	579	373	365	490	382	394	343	404		5830417I10Rik /// LOC673610 /// LOC677582	RIKEN cDNA 5830417I10 gene /// similar to Dingo protein isoform 2 /// similar to Dingo protein isoform 2	P	P	P	P	P	P	P	P	P	P	P	P	P
1430702_at	312	1080	497	403	500	1130	551	407	478	1136	768	449	162		5830427D03Rik	RIKEN cDNA 5830427D03 gene	P	P	P	P	P	P	P	P	P	P	P	P	A
1428748_at	145	98	99	108	163	55	49	53	102	261	202	128	65		5830428H23Rik	RIKEN cDNA 5830428H23 gene	P	P	P	P	P	A	P	P	P	P	P	P	P
1424591_at	421	581	433	353	532	508	346	703	478	337	298	356	622		5830433M19Rik	RIKEN cDNA 5830433M19 gene	P	P	P	P	P	P	P	P	P	P	P	P	P
1433624_at	2382	4226	3272	2980	2291	6020	6714	4645	5073	4341	2489	1774	4488		5830434P21Rik	RIKEN cDNA 5830434P21 gene	P	P	P	P	P	P	P	P	P	P	P	P	P
1433625_at	373	578	469	309	257	936	769	612	589	635	386	401	398		5830434P21Rik	RIKEN cDNA 5830434P21 gene	P	P	P	P	P	P	P	P	P	P	P	P	P
1419357_at	327	185	267	180	128	295	280	280	281	375	261	174	201		5830446M03Rik	RIKEN cDNA 5830446M03 gene	P	P	P	P	A	P	P	P	P	P	P	P	P
1459728_at	282	641	350	381	370	456	310	398	303	299	257	158	495		5830446M03Rik	RIKEN cDNA 5830446M03 gene	P	P	P	P	P	P	P	P	P	P	P	P	P
1435157_at	1876	3008	1913	3152	3543	644	772	1048	1181	2299	1879	1477	1677		5830454D03Rik	RIKEN cDNA 5830454D03 gene	P	P	P	P	P	P	P	P	P	P	P	P	P
1434161_at	3973	2227	2173	4609	4817	1262	719	1027	988	1038	748	743	1800		5830457H20Rik	RIKEN cDNA 5830457H20 gene	P	P	P	P	P	P	P	P	P	P	P	P	P
1424028_at	417	147	369	323	302	409	433	230	418	616	431	298	249		5830457O10Rik	RIKEN cDNA 5830457O10 gene	P	P	P	P	P	P	P	P	P	P	P	P	P
1453358_s_at	505	223	243	359	611	1074	422	553	421	247	507	698	689		5830467E07Rik /// C730024G19Rik	RIKEN cDNA 5830467E07 gene /// RIKEN cDNA C730024G19 gene	P	P	P	P	P	P	P	P	P	P	P	P	P
1430089_at	80	612	276	285	154	298	123	124	363	516	445	230	56		5830469G19Rik	RIKEN cDNA 5830469G19 gene	P	P	P	P	P	P	P	P	P	P	P	P	P
1453015_at	1757	2546	1713	2940	1928	5931	5958	5743	4524	2887	5949	6018	7778		5830471E12Rik	RIKEN cDNA 5830471E12 gene	P	P	P	P	P	P	P	P	P	P	P	P	P
1428457_at	841	329	349	564	477	713	765	1348	1132	778	763	714	1284		5830472M02Rik	RIKEN cDNA 5830472M02 gene	P	P	P	P	P	P	P	P	P	P	P	P	P
1441338_at	119	181	382	756	908	99	103	141	162	91	84	62	169		5930412G12Rik	RIKEN cDNA 5930412G12 gene	P	P	P	P	P	P	A	P	P	A	A	A	P
1452313_at	628	666	604	456	439	513	899	515	490	1044	745	533	426		5930416I19Rik	RIKEN cDNA 5930416I19 gene	P	P	P	P	P	P	P	P	P	P	P	P	P
1440721_at	59	402	156	171	93	215	117	95	113	510	318	184	69		5930433N17Rik	RIKEN cDNA 5930433N17 gene	A	P	P	P	A	P	A	P	P	P	P	P	A
1424690_at	146	98	210	125	150	250	364	545	357	205	157	235	216		5930434B04Rik	RIKEN cDNA 5930434B04 gene	P	A	P	P	A	P	P	P	P	P	P	P	P
1424691_at	185	219	205	181	143	1841	1594	1251	1048	407	310	313	942		5930434B04Rik	RIKEN cDNA 5930434B04 gene	A	P	P	P	A	P	P	P	P	P	P	P	P
1435018_at	1494	836	1305	1431	1330	1660	1134	712	789	2423	1840	2085	740		5930434B04Rik	RIKEN cDNA 5930434B04 gene	P	P	P	P	P	P	P	P	P	P	P	P	P
1430585_at	57	658	191	210	154	136	142	83	114	387	496	202	51		5930436O19Rik	RIKEN cDNA 5930436O19 gene	A	P	P	P	A	P	A	P	A	P	P	P	A
1444112_at	445	190	395	529	594	69	76	117	69	70	381	1726	202		6 days neonate head cDNA, RIKEN full-length enriched library, clone:5430409O07 product:unclassifiable, full insert sequence	6 days neonate head cDNA, RIKEN full-length enriched library, clone:5430409O07 product:unclassifiable, full insert sequence	P	P	P	P	P	P	P	P	P	A	P	P	P
1436357_at	255	420	332	445	576	284	225	357	275	632	645	630	239		6 days neonate spleen cDNA, RIKEN full-length enriched library, clone:F430010L17 product:hypothetical protein, full insert sequence	6 days neonate spleen cDNA, RIKEN full-length enriched library, clone:F430010L17 product:hypothetical protein, full insert sequence	P	P	P	P	P	P	P	P	P	P	P	P	P
1433203_at	49	162	80	89	123	181	65	63	127	322	268	327	27		6030400A10Rik	RIKEN cDNA 6030400A10 gene	A	P	A	P	A	P	A	A	P	P	P	P	A
1436444_at	102	55	51	27	32	1179	1147	1070	861	692	672	111	1005		6030405A18Rik	RIKEN cDNA 6030405A18 gene	P	A	A	A	A	P	P	P	P	P	P	P	P
1434699_at	424	644	318	304	327	503	234	148	205	1025	614	782	277		6030408C04Rik	RIKEN cDNA 6030408C04 gene	P	P	P	P	P	P	P	P	P	P	P	P	P
1434700_at	435	818	275	272	255	557	279	179	342	765	419	500	330		6030408C04Rik	RIKEN cDNA 6030408C04 gene	P	P	P	P	P	P	P	P	P	P	P	P	P
1455355_at	85	109	52	64	70	74	32	52	46	133	243	256	43		6030408C04Rik	RIKEN cDNA 6030408C04 gene	P	P	P	A	A	P	A	A	A	P	P	P	A
1443722_at	180	225	165	230	250	216	242	601	235	207	131	76	564		6030419C18Rik	RIKEN cDNA 6030419C18 gene	A	P	P	P	A	P	A	P	A	A	P	A	P
1438233_at	10039	1595	701	813	736	697	738	681	701	1829	1177	1117	1079		6030443O07Rik	RIKEN cDNA 6030443O07 gene	P	P	P	P	P	P	P	P	P	P	P	P	P
1455906_at	362	238	301	512	579	90	98	217	140	156	124	178	189		6030446N20Rik	RIKEN cDNA 6030446N20 gene	P	P	P	P	P	P	P	P	P	P	P	P	P
1453698_at	88	214	342	248	390	41	18	14	16	89	59	50	25		6030451C04Rik	RIKEN cDNA 6030451C04 gene	P	P	P	P	P	P	A	A	A	P	A	A	A
1433860_at	616	543	491	601	692	2319	1153	1386	1205	774	1064	723	1209		6030458C11Rik	RIKEN cDNA 6030458C11 gene	P	P	P	P	P	P	P	P	P	P	P	P	P
1434104_at	297	445	306	349	301	488	272	387	243	389	368	346	397		6030458H05	hypothetical protein 6030458H05	P	A	P	P	A	P	P	P	P	P	P	P	P
1426451_at	435	478	642	510	534	306	424	326	385	734	732	1033	244		6030465E24Rik	RIKEN cDNA 6030465E24 gene	P	P	P	P	P	P	P	P	P	P	P	P	P
1440163_at	78	779	203	202	274	876	87	158	69	683	567	247	58		6030490B17Rik	RIKEN cDNA 6030490B17 gene	P	P	P	P	P	P	P	P	P	P	P	P	P
1437873_at	387	884	524	385	628	523	437	459	338	543	527	515	778		6030490I01Rik	RIKEN cDNA 6030490I01 gene	P	P	P	P	P	P	P	P	P	P	P	P	P
1438024_at	4013	6148	5691	9633	15295	847	703	831	1588	3560	2338	1788	3240		6230416A05Rik	RIKEN cDNA 6230416A05 gene	P	P	P	P	P	P	P	P	P	P	P	P	P
1453732_at	87	104	123	212	467	25	19	20	13	147	33	31	18		6230416A05Rik	RIKEN cDNA 6230416A05 gene	A	A	P	P	P	A	A	A	A	A	A	A	A
1429543_at	995	174	94	245	47	13	136	26	924	13	8	7	172		6230424C14Rik	RIKEN cDNA 6230424C14 gene	P	P	P	P	A	A	A	P	P	A	A	A	P
1441972_at	1426	144	206	231	120	26	248	48	1342	39	12	10	204		6230424C14Rik	RIKEN cDNA 6230424C14 gene	P	P	P	P	P	A	P	P	P	A	A	A	P
1453188_at	921	216	124	189	93	4	158	51	910	52	8	12	176		6230424C14Rik	RIKEN cDNA 6230424C14 gene	P	A	A	P	A	A	A	P	P	A	A	A	A
1452903_at	132	114	113	120	85	128	227	118	269	141	123	347	106		6230427J02Rik	RIKEN cDNA 6230427J02 gene	P	A	P	P	P	P	A	P	P	P	P	P	P
1428831_at	852	1045	718	627	634	635	775	656	718	820	1197	1106	978		6230429P13Rik	RIKEN cDNA 6230429P13 gene	P	P	P	P	P	P	P	P	P	P	P	P	P
1426766_at	5832	5659	11307	19813	3013	11030	11768	13116	10402	7445	2638	618	8451		6330403K07Rik	RIKEN cDNA 6330403K07 gene	P	P	P	P	P	P	P	P	P	P	P	P	P
1453087_at	171	96	56	77	80	457	399	471	368	203	529	245	685		6330403L08Rik	RIKEN cDNA 6330403L08 gene	P	P	P	A	P	P	P	P	P	P	P	P	P
1455538_at	1658	1578	1796	3204	4084	4077	2451	6892	4945	2414	2083	2115	9327		6330403M23Rik	RIKEN cDNA 6330403M23 gene	P	P	P	P	P	P	P	P	P	P	P	P	P
1436844_at	1104	1145	1183	2084	2770	2487	1361	3813	2858	1709	1339	1168	5535		6330403M23Rik	RIKEN cDNA 6330403M23 gene	P	P	P	P	P	P	P	P	P	P	P	P	P
1431067_at	99	77	29	19	76	418	174	246	143	122	214	318	177		6330404A07Rik	RIKEN cDNA 6330404A07 gene	P	P	A	A	A	P	P	P	P	P	P	P	P
1429589_at	33	192	108	94	63	2387	1420	3610	3405	58	36	40	3556		6330404F12Rik	RIKEN cDNA 6330404F12 gene	A	P	P	A	A	P	P	P	P	A	A	A	P
1436265_at	70	84	57	56	90	439	500	850	542	279	96	32	787		6330405H19	hypothetical protein 6330405H19	P	A	A	A	A	P	P	P	P	P	A	A	P
1430101_at	35	20	163	67	35	367	265	384	233	80	23	9	194		6330406O05Rik	RIKEN cDNA 6330406O05 gene	A	A	P	A	A	P	P	P	P	A	A	A	P
1434313_at	554	358	307	532	546	213	334	878	636	313	160	155	864		6330407D12Rik	RIKEN cDNA 6330407D12 gene	P	P	P	P	P	P	P	P	P	P	P	A	P
1416911_a_at	2161	3223	1752	1121	2346	2264	1345	2643	1477	1517	2250	1919	2581		6330407G11Rik	RIKEN cDNA 6330407G11 gene	P	P	P	P	P	P	P	P	P	P	P	P	P
1416912_at	7223	5223	4921	5437	6191	5878	4161	4099	4122	6842	8564	6386	4125		6330407G11Rik	RIKEN cDNA 6330407G11 gene	P	P	P	P	P	P	P	P	P	P	P	P	P
1429579_at	273	232	146	222	125	1607	1020	2101	1517	497	155	39	3363		6330407I18Rik	RIKEN cDNA 6330407I18 gene	P	P	P	P	A	P	P	P	P	P	P	A	P
1429628_at	454	937	755	1221	917	1110	2544	477	2100	1232	899	1319	768		6330407J23Rik	RIKEN cDNA 6330407J23 gene	P	P	P	P	P	P	P	P	P	P	P	P	P
1447773_x_at	39	57	22	23	34	197	220	173	127	29	28	82	144		6330409D20Rik	RIKEN cDNA 6330409D20 gene	A	A	A	A	A	A	A	P	A	A	A	A	A
1429723_at	544	807	848	1004	1288	2914	2164	3057	2105	832	1084	1201	2591		6330409N04Rik	RIKEN cDNA 6330409N04 gene	P	P	P	P	P	P	P	P	P	P	P	P	P
1420535_a_at	444	132	187	326	263	850	616	696	633	363	211	411	445		6330412F12Rik	RIKEN cDNA 6330412F12 gene	P	P	P	P	P	P	P	P	P	P	P	P	P
1452776_a_at	465	75	185	293	180	846	394	643	551	384	243	269	195		6330412F12Rik	RIKEN cDNA 6330412F12 gene	P	A	P	P	P	P	P	P	P	P	A	A	A
1452777_a_at	282	244	378	218	201	360	749	425	410	334	233	324	280		6330412F12Rik	RIKEN cDNA 6330412F12 gene	P	P	P	P	A	P	P	P	P	P	P	P	P
1426315_a_at	242	122	183	298	381	118	176	353	247	191	580	2092	278		6330416G13Rik	RIKEN cDNA 6330416G13 gene	P	A	P	P	P	P	P	P	P	P	P	P	P
1426316_at	161	94	127	220	215	114	88	259	125	167	596	1121	174		6330416G13Rik	RIKEN cDNA 6330416G13 gene	P	P	P	P	P	P	P	P	P	P	P	P	P
1452015_at	46	117	76	108	128	56	70	86	52	53	129	399	63		6330416G13Rik	RIKEN cDNA 6330416G13 gene	A	A	A	A	A	A	A	A	A	A	A	P	A
1437911_at	244	247	92	96	190	101	97	218	107	189	195	173	227		6330416L07Rik	RIKEN cDNA 6330416L07 gene	P	P	P	P	P	P	P	P	A	P	P	P	P
1430229_at	20	158	33	24	96	71	55	78	59	210	93	91	30		6330416L11Rik	RIKEN cDNA 6330416L11 gene	A	P	A	A	A	A	A	A	A	P	A	A	A
1435849_at	52	33	16	23	14	688	602	598	545	58	1175	2537	747		6330417G02Rik	RIKEN cDNA 6330417G02 gene	A	A	A	A	A	P	P	P	P	A	P	P	P
1440849_at	169	136	117	145	151	6617	5012	4552	4023	247	333	235	5385		6330417G04Rik	RIKEN cDNA 6330417G04 gene	P	P	P	P	P	P	P	P	P	P	P	P	P
1429225_at	10	20	12	24	22	597	782	3527	2732	141	782	2544	4893		6330417K15Rik	RIKEN cDNA 6330417K15 gene	A	A	A	A	A	P	P	P	P	P	P	P	P
1453529_at	7	1005	322	287	665	109	62	41	41	210	75	22	34		6330418B08Rik	RIKEN cDNA 6330418B08 gene	A	P	P	P	P	P	P	P	A	P	P	A	A
1435200_at	15	61	123	79	79	1280	1137	947	694	258	94	11	594		6330419J24Rik	RIKEN cDNA 6330419J24 gene	A	P	P	P	P	P	P	P	P	P	P	A	P
1439971_at	270	745	536	692	504	2940	2211	5222	4195	784	465	417	5413		6330439K17Rik	RIKEN cDNA 6330439K17 gene	P	P	P	P	P	P	P	P	P	P	P	P	P
1454632_at	258	200	370	203	225	1893	1481	898	948	1412	537	1148	582		6330442E10Rik	RIKEN cDNA 6330442E10 gene	P	P	P	P	P	P	P	P	P	P	P	P	P
1457254_x_at	268	286	422	249	232	1467	1283	1159	774	710	523	919	753		6330442E10Rik	RIKEN cDNA 6330442E10 gene	P	P	P	P	P	P	P	P	P	P	P	P	P
1434359_at	197	93	77	69	107	208	178	376	238	33	54	49	231		6330500D04Rik	RIKEN cDNA 6330500D04 gene	P	P	P	A	A	P	P	P	P	A	A	A	P
1460555_at	2870	551	899	1051	1568	3434	2525	3160	2872	485	139	145	3249		6330500D04Rik	RIKEN cDNA 6330500D04 gene	P	P	P	P	P	P	P	P	P	P	P	P	P
1430685_at	34	107	49	21	17	197	291	483	344	237	230	452	216		6330503C03Rik	RIKEN cDNA 6330503C03 gene	A	A	A	A	A	P	P	P	P	P	P	P	P
1455421_x_at	28	15	27	13	9	495	431	723	398	160	286	391	559		6330503C03Rik	RIKEN cDNA 6330503C03 gene	A	A	A	A	A	P	P	P	P	P	P	P	P
1455218_at	321	601	328	225	250	934	801	626	736	677	3963	12047	1821		6330503K22Rik	RIKEN cDNA 6330503K22 gene	P	P	P	P	P	P	P	P	P	P	P	P	P
1426832_at	217	1726	1149	830	767	661	920	987	953	3281	2063	3078	559		6330505F04Rik	RIKEN cDNA 6330505F04 gene	P	P	P	P	P	P	P	P	P	P	P	P	P
1438496_a_at	58	282	166	128	130	255	165	122	161	527	285	674	90		6330505F04Rik	RIKEN cDNA 6330505F04 gene	P	P	P	P	A	P	P	P	P	P	P	P	P
1439018_at	298	195	204	151	166	88	138	122	92	102	162	353	207		6330505N24Rik	RIKEN cDNA 6330505N24 gene	P	P	P	P	P	A	P	P	P	P	P	P	P
1434535_at	12	68	17	29	44	380	323	579	485	103	69	59	465		6330509G02Rik	RIKEN cDNA 6330509G02 gene	A	A	A	A	A	P	P	P	P	A	A	A	P
1457354_at	8	19	5	8	7	131	127	257	223	79	17	15	255		6330509G02Rik	RIKEN cDNA 6330509G02 gene	A	A	A	A	A	P	P	P	P	P	A	A	P
1437421_at	562	1161	907	765	799	1640	991	1296	1134	1186	609	111	1567		6330509M05Rik	RIKEN cDNA 6330509M05 gene	P	P	P	P	P	P	P	P	P	P	P	A	P
1438797_at	95	327	198	146	142	137	139	182	150	363	153	32	132		6330509M05Rik	RIKEN cDNA 6330509M05 gene	P	P	P	P	P	P	P	P	P	P	P	A	P
1454897_at	308	904	772	355	491	2120	796	1487	677	1026	327	32	1231		6330509M05Rik	RIKEN cDNA 6330509M05 gene	P	P	P	P	P	P	P	P	P	P	P	A	P
1453324_at	247	437	331	247	252	1098	996	982	632	316	427	278	844		6330509M23Rik	RIKEN cDNA 6330509M23 gene	A	P	P	P	A	P	P	P	P	P	P	A	P
1455239_at	1855	12	125	43	25	70	154	379	290	1167	181	11	168		6330512M04Rik	RIKEN cDNA 6330512M04 gene	P	A	A	A	A	A	P	P	P	P	P	A	P
1423853_at	13	81	42	38	88	1155	884	2631	2255	95	36	38	5642		6330527O06Rik	RIKEN cDNA 6330527O06 gene	A	A	A	A	A	P	P	P	P	A	A	A	P
1434094_at	12	8	4	5	9	1	3	10	3	20	6833	12573	474		6330530A05Rik	RIKEN cDNA 6330530A05 gene	A	A	A	A	A	A	A	A	A	A	P	P	P
1442040_at	15	51	17	20	41	44	22	55	38	9	1447	3673	142		6330530A05Rik	RIKEN cDNA 6330530A05 gene	A	A	A	A	A	P	A	A	A	A	P	P	P
1453306_at	146	129	127	189	299	166	183	455	289	198	149	79	335		6330531I01Rik	RIKEN cDNA 6330531I01 gene	P	A	P	P	P	P	A	P	P	P	A	A	P
1453373_at	25	134	119	125	151	359	248	402	231	345	206	151	648		6330532G10Rik	RIKEN cDNA 6330532G10 gene	A	P	P	P	P	P	P	P	P	P	P	P	P
1459714_at	110	119	74	209	180	124	86	148	82	311	123	202	75		6330545A04Rik	RIKEN cDNA 6330545A04 gene	P	P	P	P	P	P	P	P	P	P	P	P	P
1430041_at	422	391	521	178	240	350	625	475	449	477	365	402	470		6330548G22Rik	RIKEN cDNA 6330548G22 gene	P	P	P	P	P	P	P	P	P	P	P	P	P
1433511_at	285	643	605	342	436	404	228	364	230	270	602	842	397		6330549H03Rik	RIKEN cDNA 6330549H03 gene	P	P	P	P	P	P	P	P	P	P	P	P	P
1454631_at	434	332	354	493	384	861	253	352	267	392	600	678	342		6330549H03Rik	RIKEN cDNA 6330549H03 gene	P	P	P	P	P	P	P	P	P	P	P	P	P
1460624_at	414	828	800	571	543	842	892	731	759	1127	1024	799	770		6330564D18Rik	RIKEN cDNA 6330564D18 gene	P	P	P	P	P	P	P	P	P	P	P	P	P
1454644_at	1033	1424	1821	1515	1242	1662	2719	1720	1870	2338	1076	501	990		6330569M22Rik	RIKEN cDNA 6330569M22 gene	P	P	P	P	P	P	P	P	P	P	P	P	P
1425194_a_at	5050	3309	3298	3052	2713	3102	3410	2972	3757	4031	3501	4242	3158		6330577E15Rik	RIKEN cDNA 6330577E15 gene	P	P	P	P	P	P	P	P	P	P	P	P	P
1426355_a_at	4993	3941	3763	5137	5476	2882	1870	2192	2267	2949	2979	2631	3713		6330578E17Rik	RIKEN cDNA 6330578E17 gene	P	P	P	P	P	P	P	P	P	P	P	P	P
1426356_at	174	41	128	84	119	240	187	135	150	90	207	203	141		6330578E17Rik	RIKEN cDNA 6330578E17 gene	P	A	P	P	A	P	P	P	P	P	P	P	P
1426292_at	249	175	142	219	302	219	174	355	289	319	188	211	414		6330581L23Rik	RIKEN cDNA 6330581L23 gene	P	A	A	P	P	P	P	P	P	P	P	P	P
1426293_at	246	285	259	251	367	475	347	224	333	372	494	594	378		6330581L23Rik	RIKEN cDNA 6330581L23 gene	P	P	P	P	P	P	P	P	P	P	P	P	P
1434136_at	164	1868	2853	3738	3866	113	128	134	132	371	244	2014	809		6332401O19Rik	RIKEN cDNA 6332401O19 gene	P	P	P	P	P	P	P	P	P	P	P	P	P
1444135_at	81	284	298	361	406	61	47	104	100	90	46	127	157		6332401O19Rik	RIKEN cDNA 6332401O19 gene	A	P	P	A	P	A	A	A	A	A	A	A	A
1455963_at	248	804	1843	2892	3366	193	132	201	116	389	193	1222	366		6332401O19Rik	RIKEN cDNA 6332401O19 gene	P	P	P	P	P	P	P	P	P	P	P	P	P
1435307_at	12	48	42	84	13	542	389	1437	955	277	96	9	1945		6430502M16Rik	RIKEN cDNA 6430502M16 gene	A	A	P	P	A	P	P	P	P	P	P	A	P
1457218_at	257	909	858	1200	997	3002	2479	2219	2685	1254	665	169	3887		6430510M02Rik	RIKEN cDNA 6430510M02 gene	P	P	P	P	P	P	P	P	P	P	P	P	P
1456765_at	78	75	54	90	92	519	305	574	793	120	625	249	473		6430511F03	hypothetical protein 6430511F03	A	A	A	A	A	P	P	P	P	A	P	A	P
1425213_at	1348	331	426	891	1011	3564	3426	4601	3574	457	227	186	6200		6430514L14Rik	RIKEN cDNA 6430514L14 gene	P	P	P	P	P	P	P	P	P	P	P	P	P
1438706_at	19	66	157	45	41	297	415	491	496	330	35	12	262		6430517E21Rik	RIKEN cDNA 6430517E21 gene	A	A	A	A	A	P	P	P	P	P	A	A	P
1458375_at	532	1875	1499	1030	1131	886	1240	1006	803	2056	917	500	950		6430524H05Rik	RIKEN cDNA 6430524H05 gene	P	P	P	P	P	P	P	P	P	P	P	P	P
[truncated: 18,934 more rows]
